# Supplementary material for: A highly stereocontrolled total synthesis of dysiherbaine
Source: Royal Society of Chemistry journal article supplement (doi:10.1039/b709627e), 2007-01-01

## A Highly Stereocontrolled Total Synthesis of Dysiherbaine

Keisuke Takahashi, Takashi Matsumura, Jun Ishihara and Susumi Hatakeyama\*

*Graduate School of Biomedical Sciences, Nagasaki University, Nagasaki 852-8521, Japan  
susumi@net.nagasaki-u.ac.jp*

### Supporting Information

**General Procedure.** Where appropriate, reactions performed in flame dried glassware under argon atmosphere. All extracts were dried over  $\text{MgSO}_4$  and concentrated by rotary evaporation below 30 °C at 25 Torr. Commercial reagents and solvents were used as supplied with following exceptions. Anhydrous tetrahydrofuran (THF) and diethyl ether ( $\text{Et}_2\text{O}$ ) was purchased from Kanto Chemical Co., Inc. Dichloromethane ( $\text{CH}_2\text{Cl}_2$ ) triethylamine, dimethyl sulfoxide (DMSO), *N,N*-dimethylformamide (DMF), *N,N*-dimethylacetamide (DMA), *N,N,N,N',N',N'*-hexamethylphosphoramide (HMPA), benzene, acetonitrile (MeCN) were distilled from  $\text{CaH}_2$ . Methanol (MeOH) was distilled from sodium. Analytical thin-layer chromatography was performed with Merck F-254 TLC plates. Column chromatography was performed using Kanto Chemical Co., Inc. silica gel 60N (spherical, neutral). Infrared spectra were measured on a JASCO FTIR-230 spectrometer. Optical rotations were recorded on a JASCO DIP-370 polarimeter at ambient temperature.  $^1\text{H}$  and  $^{13}\text{C}$  NMR spectra were measured on a Varian Gemini 300, JEOL JNM-AL 400, or Varian Unity plus 500 spectrometer. For  $^1\text{H}$  spectra, Chemical shifts are reported as  $\delta$  values in ppm and are calibrated according to internal  $\text{CHCl}_3$  (7.26 ppm) or PhH (7.14 ppm). For  $^{13}\text{C}$  spectra, chemical shifts are reported as  $\delta$  values in ppm relative to chloroform or methanol. EI and FAB Mass spectra were measured on a JEOL JMS-700N.

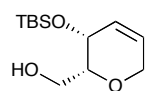

**((2*R*,3*R*)-3-(*tert*-Butyldimethylsilyl)oxy-3,6-dihydro-2*H*-pyran-2-yl)methanol (10).** To a stirred solution of tri-*O*-acetyl-D-galactal (**9**) (30 g, 110 mmol) in  $\text{CH}_2\text{Cl}_2$  (550 ml) at 0 °C were added triethylsilane (25.6 g, 522 mmol) and  $\text{BF}_3 \cdot \text{OEt}_2$  (28.1 g, 198 mmol). After stirring at 0 °C for 2 h, the reaction was quenched with saturated  $\text{NaHCO}_3$ . The reaction mixture was extracted with  $\text{CH}_2\text{Cl}_2$ , washed with brine and concentrated to give the corresponding diacetate (**28**) as a colorless oil, which was used for the next reaction without purification.

Crude diacetate (**28**) was dissolved into MeOH (360 ml) and NaOMe (1.19 g, 22.0 mmol) was added. After being stirred at room temperature for 2 h, the reaction mixture was neutralized with Dowex 50, filtrated, and evaporated to give the corresponding diol (**14**) as a colorless solid, which was used for the next reaction without purification.

Crude diol (**14**) was dissolved into DMF (368 ml) and cooled to 0 °C. Imidazole (22.5 g, 275 mmol) and *tert*-butyldimethylsilyl chloride (41.5 g, 330 mmol) were added and the mixture was stirred at room temperature for 12 h. Saturated  $\text{NH}_4\text{Cl}$  (200 ml) was added and the mixture was stirred at room temperature for 10 min. The reaction mixture was extracted with  $\text{Et}_2\text{O}$ , washed with water and brine, and concentrated to give ((2*R*,3*R*)-3-(*tert*-butyldimethylsilyl)oxy-2-(*tert*-butyldimethylsilyl)oxymethyl-3,6-dihydro-2*H*-pyran (**38.7** g) as a pale yellow oil, which was used for the next reaction without purification. A sample for the characterization data was obtained by column chromatography (hexane/AcOEt = 15/1):  $[\alpha]_D^{22}$   $-90.6^\circ$  (*c* 1.10,  $\text{CHCl}_3$ ); FTIR (neat) 1471, 1254, 1103  $\text{cm}^{-1}$ ;  $^1\text{H}$  NMR (300 MHz,  $\text{CDCl}_3$ )  $\delta$  5.89 (m, 2H), 4.26 (dd,  $J$  = 1.8, 16.2 Hz, 1H), 4.10 (m, 1H), 4.04 (m, 1H), 3.82 (dd,

$J = 5.7, 10.8$  Hz, 1H), 3.74 (dd,  $J = 6.3, 10.8$  Hz, 1H), 3.49 (dt,  $J = 2.6, 6.3$  Hz, 1H), 0.90 (s, 18H), 0.08 (s, 12H);  $^{13}\text{C}$  NMR (100 MHz,  $\text{CDCl}_3$ )  $\delta$  129.3, 126.6, 79.0, 65.5, 63.2, 62.8, 26.0, 25.7, 18.5, 18.3, -3.5, -3.9, -4.5, -5.1; MS (EI)  $m/z$  117, 147, 301 (100), 343 [(M-Me) $^+$ ]; HRMS (EI) calcd for  $\text{C}_{17}\text{H}_{35}\text{O}_3\text{Si}_2$  [(M-Me) $^+$ ] 343.2125, found 343.2125.

Crude di-TBS ether (38.7 g) was dissolved into MeOH (360 ml), and  $\text{NH}_4\text{F}$  (12 g, 324 mmol) was added. After being stirred at 0 °C for 7 days, most of the MeOH was evaporated in vacuo. The residue was extracted with AcOEt, washed with saturated  $\text{NaHCO}_3$ , dried, concentrated, and chromatographed ( $\text{SiO}_2$  800 g, hexane/AcOEt = 5/1) to give **10** (23.1 g, 88 %) as a colorless solid:  $[\alpha]_D^{22} -159.1^\circ$  ( $c$  1.07,  $\text{CHCl}_3$ ); FTIR (neat) 3433, 3037, 1471, 1389, 1257  $\text{cm}^{-1}$ ;  $^1\text{H}$  NMR (400 MHz,  $\text{CDCl}_3$ )  $\delta$  5.94 (m, 1H), 5.86 (m, 1H), 4.30 (m, 1H), 4.11 (m, 2H), 3.90 (ddd,  $J = 2.9, 7.3, 11.2$  Hz, 1H), 3.73 (ddd,  $J = 3.9, 9.3, 11.7$  Hz, 1H), 3.59 (quint,  $J = 3.4$  Hz, 1H), 2.19 (dd,  $J = 2.9, 9.3$  Hz, 1H), 0.90 (s, 9H), 0.10 (s, 6H);  $^{13}\text{C}$  NMR (100 MHz,  $\text{CDCl}_3$ )  $\delta$  129.3, 126.1, 78.2, 65.1, 64.1, 62.8, 25.7, 18.1, -4.1, -4.7; MS (EI)  $m/z$  75 (100), 105, 157, 243 [(M-H) $^+$ ]; HRMS (EI) calcd for  $\text{C}_{12}\text{H}_{23}\text{O}_3\text{Si}$  [(M-H) $^+$ ] 243.1417, found 243.1411.

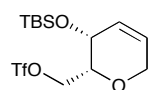

**((2R,3R)-3-(tert-Butyldimethylsilyl)oxy-3,6-dihydro-2H-pyran-2-yl)methyl trifluoromethanesulfonate.** To a stirred solution of **10** (3.06 g, 15.0 mmol) in  $\text{CH}_2\text{Cl}_2$  (125 ml) at -78 °C were added 2,6-lutidine (2.01 g, 18.8 mmol) and trifluoromethanesulfonic anhydride (4.2 g, 15.0 mmol). After being stirred at -78 °C for 90 min, the mixture was diluted with  $\text{CH}_2\text{Cl}_2$  (200 ml), washed with water, 1M HCl, saturated  $\text{NaHCO}_3$  and brine, dried, and concentrated. The residue was purified by column chromatography ( $\text{SiO}_2$  90 g, hexane/AcOEt = 20/1) to give the corresponding triflate (4.6 g, 98 %) as a yellow oil:  $[\alpha]_D^{24} -116.4^\circ$  ( $c$  1.05,  $\text{CHCl}_3$ ); FTIR (neat) 1417, 1248, 1217, 1151, 1007  $\text{cm}^{-1}$ ;  $^1\text{H}$  NMR (300 MHz,  $\text{CDCl}_3$ )  $\delta$  5.95 (m, 1H), 5.87 (m, 1H), 4.65 (m, 2H), 4.29 (m, 1H), 4.14 (m, 1H), 4.11 (m, 1H), 3.86 (dt,  $J = 3.7, 7.5$  Hz, 1H), 0.89 (s, 9H), 0.10 (s, 3H), 0.09 (s, 3H);  $^{13}\text{C}$  NMR (75 MHz,  $\text{CDCl}_3$ )  $\delta$  129.6, 125.5, 118.6 (q,  $^1J_{\text{C,F}} = 317.6$  Hz), 75.8, 75.1, 64.8, 63.12, 25.7, 18.0, -4.0, -4.8; MS (EI)  $m/z$  43 (100), 95, 289, 319, 377 (M) $^+$ ; HRMS (EI) calcd for  $\text{C}_{13}\text{H}_{23}\text{F}_3\text{O}_5\text{SSi}$  (M) $^+$ ] 376.0988, found 376.0900.

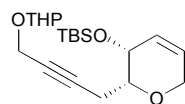

**(2R,3R)-3-(tert-Butyldimethylsilyl)oxy-3,6-dihydro-2-(4-(tetrahydro-2H-pyran-2-yl)oxybut-2-ynyl)-2H-pyran (11).** To a stirred solution of propargyl tetrahydropyranyl ether (55 g, 393 mmol) in THF (220 ml) at -65 °C was added *n*-butyllithium (1.6 M in hexane, 227 ml, 364 mmol), and the mixture was stirred for 1 h. A solution of the triflate (29.1 g, 77.3 mmol) in THF (20 ml) and DMPU (60 ml) was added, and the mixture was stirred at -65 °C for 5 days. The reaction was quenched with saturated  $\text{NaHCO}_3$  and the reaction mixture was extracted with AcOEt, washed with brine, dried, concentrated, and chromatographed ( $\text{SiO}_2$  700g, hexane/AcOEt = 15/1-8/1) to give **11** (23.6 g, 83 %) as a colorless oil: FTIR (neat) 1471, 1360, 1254, 1184, 1119, 1082, 1024  $\text{cm}^{-1}$ ;  $^1\text{H}$  NMR (300 MHz,  $\text{CDCl}_3$ )  $\delta$  5.88 (m, 2H), 4.80 (br, 1H), 4.30 (dt,  $J = 2.4, 15.3$  Hz, 1H), 4.25 (m, 1H), 4.20 (dt,  $J = 15.0, 2.1$  Hz, 1H), 4.11 (m, 1H), 4.07 (m, 1H), 3.84 (m, 1H), 3.63 (dt,  $J = 2.3, 7.5$  Hz, 1H), 3.53 (m, 1H), 2.58 (m, 2H), 1.68-1.40 (m, 6H), 0.90 (s, 9H), 0.10 (s, 3H), 0.95 (s, 3H);  $^{13}\text{C}$  NMR (75 MHz,  $\text{CDCl}_3$ )  $\delta$  129.0, 126.4, 96.5, 96.4, 83.1, 76.9, 76.5, 65.4, 63.4, 61.7, 54.43, 54.39, 30.1, 25.8, 25.3, 25.2, 20.8, 18.9, 18.1, -4.1, -4.8; MS (EI)  $m/z$  85, 159 (100), 184, 225, 309, 366 (M) $^+$ ; HRMS (EI) calcd for  $\text{C}_{20}\text{H}_{34}\text{O}_4\text{Si}$  (M) $^+$ ] 366.2227, found 366.2222.

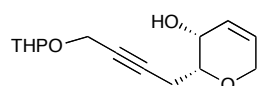

**(2R,3R)-3,6-dihydro-2-(4-(tetrahydro-2H-pyran-2-yloxy)but-2-ynyl)-2H-pyran-3-ol (12):** To a stirred solution of **11** (293 mg, 0.799

mmol) in THF (8 ml) was added TBAF (1M in THF, 0.8 ml, 0.8 mmol) at room temperature. After being stirred at room temperature for 13 h, saturated  $\text{NH}_4\text{Cl}$  was added and the reaction mixture was extracted with AcOEt. The extract was washed with  $\text{NaHCO}_3$  and brine, dried, and concentrated to give **12** (217 mg) as a yellow oil, which was used for the next reaction without purification. A sample for the characterization data was obtained by column chromatography (hexane/AcOEt = 2/1):  $[\alpha]_D^{19} -88.6^\circ$  (*c* 0.99,  $\text{CHCl}_3$ ); FTIR (neat) 3654, 3438, 2225, 1354, 1265, 1084, 1024  $\text{cm}^{-1}$ ;  $^1\text{H}$  NMR (400 MHz,  $\text{CDCl}_3$ )  $\delta$  6.06 (m, 1H), 5.96 (m, 1H), 4.80 (t, *J* = 3.2 Hz, 1H), 4.35-4.10 (m, 2H), 4.21 (m, 2H), 3.96 (br, 1H), 3.84 (m, 1H), 3.63 (dt, *J* = 1.4, 7.8 Hz, 1H), 3.53 (m, 1H), 2.69-2.56 (m, 2H), 1.82-1.53 (m, 6H);  $^{13}\text{C}$  NMR (75 MHz,  $\text{CDCl}_3$ )  $\delta$  129.7, 126.5, 96.4, 82.3, 77.1, 76.5, 66.1, 62.5, 61.6, 54.4, 30.0, 25.1, 21.1, 18.8; MS (EI) *m/z* 85 (100), 150, 183, 198, 228, 251  $[(\text{M}-\text{H})^+]$ ; HRMS (EI) calcd for  $\text{C}_{14}\text{H}_{20}\text{O}_4$  ( $\text{M}^+$ ) 252.1361, found 252.1355.

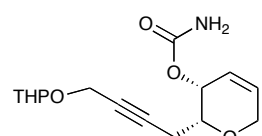 **(2R,3R)-3,6-Dihydro-2-(4-(tetrahydro-2H-pyran-2-yl)oxybut-2-ynyl)-2H-pyran-3-yl Carbamate (13):** To an ice-cooled solution of crude **12** (217 mg) in  $\text{CH}_2\text{Cl}_2$  (4 ml) was added trichloroacetylisocyanate (240 mg, 1.28 mmol), and the mixture was stirred at 0  $^\circ\text{C}$  for 3 h. Most of the  $\text{CH}_2\text{Cl}_2$  was removed in vacuo and the residue was dissolved into MeOH (4 ml). 2 M  $\text{K}_2\text{CO}_3$  (1.2 ml) was added at 0  $^\circ\text{C}$ , and the mixture was stirred at room temperature overnight. The reaction mixture was extracted with  $\text{CH}_2\text{Cl}_2$ , washed with brine, dried, concentrated, and chromatographed ( $\text{SiO}_2$  5 g, hexane/AcOEt = 1/1) to give **13** (237 mg, 100%) as a colorless solid:  $[\alpha]_D^{22} -227.7^\circ$  (*c* 0.92,  $\text{CHCl}_3$ ); FTIR (neat) 3456, 3352, 1716, 1604, 1377, 1309, 1084  $\text{cm}^{-1}$ ;  $^1\text{H}$  NMR (400 MHz,  $\text{CDCl}_3$ )  $\delta$  6.07 (m, 2H), 5.05 (m, 1H), 4.81 (m, 3H), 4.33-4.19 (m, 4H), 3.86-3.77 (m, 2H), 3.54 (m, 1H), 2.59 (brd, *J* = 6.8 Hz, 2H), 1.81-1.54 (m, 6H);  $^{13}\text{C}$  NMR (75 MHz,  $\text{CDCl}_3$ )  $\delta$  156.3, 131.8, 122.9, 96.6, 81.7, 74.8, 66.1, 65.3, 61.9, 54.4, 30.2, 25.3, 21.3, 19.0; MS (EI) *m/z* 85 (100), 105, 133, 183, 294  $[(\text{M}-\text{H})^+]$ ; HRMS (EI) calcd for  $\text{C}_{15}\text{H}_{20}\text{NO}_5$   $[(\text{M}-\text{H})^+]$  294.1341, found 294.1344.

### Aminohydroxylation of 13

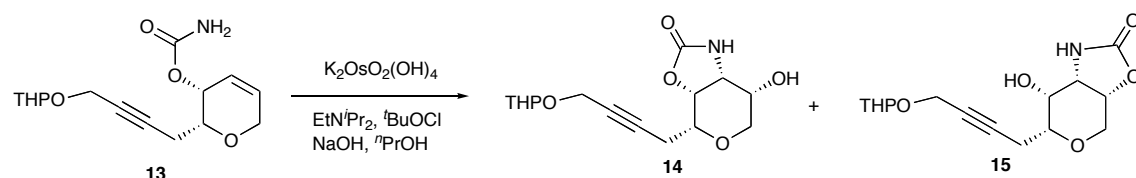

To a stirred solution of **13** (237 mg, 0.828 mmol) in *n*-propanol (9 ml) was added 0.08 M NaOH (9 ml) at room temperature. After stirring at room temperature for 5 min, *tert*-butyl hypochlorite (96 mg, 0.882 mmol) was added, and stirring was continued at room temperature for 25 min. *N,N*-diisopropylethylamine (5.16 mg, 0.04 mmol) was added and, 5 min later,  $\text{K}_2\text{OsO}_2(\text{OH})_4$  (30 mg, 0.08 mmol) was added with a few drops of 0.08 M NaOH. After stirring at room temperature for 80 min, the reaction was quenched with  $\text{Na}_2\text{SO}_3$  (150 mg). Most of the *n*-propanol was evaporated in vacuo and the residue was extracted with AcOEt. The extract was washed with brine, dried over  $\text{Na}_2\text{SO}_4$ , concentrated, and chromatographed ( $\text{SiO}_2$  19 g, AcOEt) to give **14** (142 mg, 57 %) and **15** (20.0 mg, 8%) each as a colorless amorphous solid together with recovered **13** (21.0 mg, 9%).

**Compound 14:**  $[\alpha]_D^{20} -96.8^\circ$  (*c* 1.24,  $\text{CHCl}_3$ ); FTIR (neat) 3392, 1751, 1392, 1265, 1219, 1115, 1018  $\text{cm}^{-1}$ ;  $^1\text{H}$  NMR (400 MHz,  $\text{CDCl}_3$ )  $\delta$  6.63 (s, 1H), 4.78 (d, *J* = 3.4 Hz, 1H), 4.60 (m, 1H), 4.29 (dt, *J* = 15.1, 2.0 Hz, 1H), 4.19 (d, *J* = 15.1 Hz, 1H), 4.07 (dd, *J* = 2.4, 12.2 Hz, 1H), 3.83 (m, 3H), 3.71 (dt, *J* = 2.0, 7.3 Hz, 1H), 3.53 (m, 1H), 3.48 (d, *J* = 12.7 Hz, 1H), 2.70

(d,  $J = 7.2$  Hz, 2H), 1.69-1.50 (m, 6H);  $^{13}\text{C}$  NMR (75 MHz,  $\text{CDCl}_3$ )  $\delta$  161.4, 96.8, 81.1, 78.1, 74.2, 74.1, 68.9, 63.7, 62.1, 62.0, 54.5, 53.3, 30.2, 25.3, 21.6, 19.1, 19.0; MS (EI)  $m/z$  85 (100), 158, 211, 256, 284, 311 ( $\text{M}^+$ ); HRMS (EI) calcd for  $\text{C}_{15}\text{H}_{21}\text{NO}_6$  ( $\text{M}^+$ ) 311.1369, found 311.1346.

**Compound 15:**  $[\alpha]_{\text{D}}^{19} -72.5^\circ$  ( $c$  1.10,  $\text{CHCl}_3$ ); FTIR (neat) 3354, 2243, 1751, 1356, 1215, 1126, 1024  $\text{cm}^{-1}$ ;  $^1\text{H}$  NMR (400 MHz,  $\text{CDCl}_3$ )  $\delta$  6.67 (brd,  $J = 13.6$  Hz, 1H), 4.79 (t,  $J = 3.18$  Hz, 1H), 4.47 (dd,  $J = 2.4, 6.3$  Hz, 1H), 4.39 (d,  $J = 14.2$  Hz, 1H), 4.28 (dt,  $J = 15.6, 2.0$  Hz, 1H), 4.19 (d,  $J = 15.6$  Hz, 1H), 3.92-3.75 (m, 4H), 3.53 (m, 1H), 3.37 (t,  $J = 7.0$  Hz, 1H), 2.65 (m, 2H), 2.00 (br, 1H), 1.81-1.54 (m, 6H);  $^{13}\text{C}$  NMR (75 MHz,  $\text{CDCl}_3$ )  $\delta$  162.0, 96.8, 96.7, 81.9, 77.4, 75.6, 73.3, 66.5, 65.01, 65.0, 62.0, 54.5, 53.9, 30.2, 30.1, 25.3, 21.6, 19.0; MS (EI)  $m/z$  85 (100), 158, 210, 280, 311 ( $\text{M}^+$ ); HRMS (EI) calcd for  $\text{C}_{15}\text{H}_{21}\text{NO}_6$  ( $\text{M}^+$ ) 311.1369, found 311.1348.

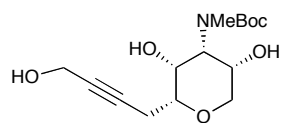

**tert-Butyl (2R,3R,4R,5S)-Tetrahydro-3,5-dihydroxy-2-(4-hydroxybut-2-ynyl)-2H-pyran-4-ylmethylcarbamate (16):** A mixture of **14** and **15** (1.71 g, 5.49 mmol) was dissolved in 4:1 DMF-acetone (34 ml). 2-Methoxypropene (1.2 g, 16.5 mmol) and PPTS (97

mg, 0.38 mmol) were added to this solution at room temperature, and the mixture was stirred at room temperature overnight. The reaction mixture was diluted with AcOEt, washed with saturated  $\text{NaHCO}_3$  and brine, dried, concentrated, and chromatographed ( $\text{SiO}_2$  100 g, hexane/AcOEt = 4/1-2/1) to give a mixture of the corresponding acetonides (1.58 g, 82 %), which was used for the next reaction without separation.

**Major acetonide:** FTIR (neat) 2239, 1759, 1385, 1271, 1234, 1122, 1028  $\text{cm}^{-1}$ ;  $^1\text{H}$  NMR (300 MHz,  $\text{CDCl}_3$ )  $\delta$  4.79 (s, 1H), 4.69 (m, 1H), 4.56 (t,  $J = 7.8$  Hz, 1H), 4.26-4.15 (m, 3H), 4.05 (dd,  $J = 4.0, 8.1$  Hz, 1H), 3.85 (m, 1H), 3.67 (dd,  $J = 13.5, 4.0$  Hz, 1H), 3.50 (m, 1H), 3.41 (dt,  $J = 8.1, 2.0$  Hz, 1H), 2.67 (d,  $J = 7.2$  Hz, 2H), 1.90-1.40 (m, 6H), 1.81 (s, 3H), 1.40 (s, 3H); MS (EI)  $m/z$  85, 192, 251 (100), 336, 351 ( $\text{M}^+$ ); HRMS (EI) calcd for  $\text{C}_{18}\text{H}_{25}\text{NO}_6$  ( $\text{M}^+$ ) 351.1682, found 351.1682.

**Minor acetonide:** FTIR (neat) 2235, 1757, 1683, 1378, 1239, 1117, 1028  $\text{cm}^{-1}$ ;  $^1\text{H}$  NMR (300 MHz,  $\text{CDCl}_3$ )  $\delta$  4.81 (t,  $J = 3.0$  Hz, 1H), 4.56 (d,  $J = 4.5$  Hz, 2H), 4.35-4.10 (m, 3H), 4.12 (m, 1H), 3.84 (m, 1H), 3.60-3.51 (m, 3H), 2.64 (d,  $J = 7.2$  Hz, 2H), 1.90-1.50 (m, 6H), 1.79 (s, 3H), 1.40 (s, 3H); MS (EI)  $m/z$  85 (100), 252, 267, 336, 351 ( $\text{M}^+$ ); HRMS (EI) calcd for  $\text{C}_{18}\text{H}_{25}\text{NO}_6$  ( $\text{M}^+$ ) 351.1682, found 351.1675.

The mixture of acetonides (1.58 g) was dissolved into THF (45 ml) and cooled to  $0^\circ\text{C}$ .  $\text{LiAlH}_4$  (513 mg, 13.5 mmol) was added, and the mixture was stirred overnight. 3 M NaOH (10 ml) was added, and the reaction mixture was filtered through Celite, concentrated, and chromatographed ( $\text{SiO}_2$  100 g, hexane/AcOEt = 1/1) to give a mixture of the corresponding methyl amines (1.25 g, 80%).

The mixture was dissolved into methanol (47 ml). 35% HCl (4.8 ml) was added to the solution. The mixture was refluxed for 23 h and then cooled to  $0^\circ\text{C}$ . NaOH (3 N, 17 ml) and  $\text{Boc}_2\text{O}$  (3.1 g, 14.2 mmol) were added to the mixture and further stirred for 19 h. Saturated  $\text{NH}_4\text{Cl}$  (20 ml) was added to the mixture which was extracted with  $\text{CH}_2\text{Cl}_2$  (100 ml). Organic layer was washed by brine (40 ml) dried and concentrated. The residue (263 mg) was purified by column chromatography ( $\text{SiO}_2$  125 g, hexane/AcOEt = 2/1-1/2) to give **16** (1.19 g, 3.77 mmol, 80%) as white amorphous.

$[\alpha]_{\text{D}}^{25} -21.4^\circ$  ( $c$  1.02,  $\text{CHCl}_3$ ); FTIR (neat) 3392, 2974, 2927, 1668, 1446, 1363, 1153, 1099, 1014  $\text{cm}^{-1}$ ;  $^1\text{H}$  NMR (400 MHz,  $\text{CDCl}_3$ )  $\delta$  4.52 (brd,  $J = 6.8$  Hz, 1H), 4.45 (br, 1H), 4.21 (s, 2H), 4.13 (d,  $J = 8.0$  Hz, 1H), 4.07 (br, 1H), 4.02 (d,  $J = 12.4$  Hz, 1H), 3.87 (s, 1H), 3.65 (d,  $J = 12.0$  Hz, 1H), 3.55 (t,  $J = 7.2$  Hz, 1H), 3.22 (s, 3H), 2.70-2.58 (m, 2H), 1.48 (s, 9H);  $^{13}\text{C}$

NMR (100 MHz, CDCl<sub>3</sub>)  $\delta$  156.6, 81.6, 80.5, 79.2, 77.2, 73.4, 70.6, 70.0, 57.9, 51.0, 33.7, 28.4, 21.5; MS (EI)  $m/z$  57 (100), 104, 172, 228, 315 ( $M^+$ ); HRMS (EI) calcd for C<sub>15</sub>H<sub>25</sub>NO<sub>6</sub> ( $M^+$ ) 315.1681, found 315.1668.

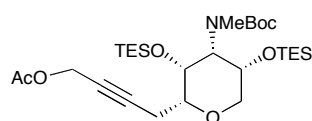

**tert-Butyl (2R,3R,4R,5S)-2-(4-Acetoxybut-2-ynyl)-3,5-bis(triethylsilyloxy)-tetrahydro-2H-pyran-4-ylmethylcarbamate:**

To an ice-cooled solution of **16** (1.18 g, 3.74 mmol) in pyridine (37 ml) was added Ac<sub>2</sub>O (573 mg, 5.61 mmol), and the mixture was stirred at room temperature overnight. The reaction was quenched with MeOH (1 ml) and the reaction mixture was extracted with CH<sub>2</sub>Cl<sub>2</sub>. The extract was washed with brine, dried, and concentrated. The residue (1.81 g) was dissolved into CH<sub>2</sub>Cl<sub>2</sub> (20 ml) and cooled to -78 °C. 2,6-Lutidine (1.52 g, 14.2 mmol) and TESOTf (3.21 g, 12.17 mmol) were added, and the mixture was stirred at -78 °C for 4 h. The reaction was quenched with saturated NH<sub>4</sub>Cl, and the reaction mixture was extracted with AcOEt. The extract was washed with brine, dried, concentrated, and chromatographed (SiO<sub>2</sub> 60 g, hexane/AcOEt = 20/1) to give the acetate (1.74 g, 80 %) as a colorless oil:  $[\alpha]_D^{24}$  -21.7° (*c* 1.15, CHCl<sub>3</sub>); FTIR (neat) 2239, 1232, 1147, 1011 cm<sup>-1</sup>; <sup>1</sup>H NMR (400 MHz, CDCl<sub>3</sub>)  $\delta$  4.66 (s, 2H), 4.10 (s, 2H), 4.00 (s, 1H), 3.93 (d, *J* = 12.2 Hz, 1H), 3.56 (d, *J* = 11.2 Hz, 1H), 3.46 (t, *J* = 6.6 Hz, 1H), 3.16 (s, 3H), 2.51 (br, 2H), 2.08 (s, 3H), 1.48 (s, 9H), 0.99-0.94 (m, 18H), 0.69-0.58 (m, 12H); <sup>13</sup>C NMR (100 MHz, CDCl<sub>3</sub>)  $\delta$  170.2, 156.5, 84.0, 79.6, 77.2, 76.0, 74.0, 71.1, 69.7, 55.9, 52.6, 33.8, 28.3, 21.9, 20.6, 7.0, 6.7, 5.4, 5.1, 5.0; MS (EI)  $m/z$  145, 246, 356, 456, 500 (100), 585 ( $M^+$ ); HRMS (EI) calcd for C<sub>29</sub>H<sub>55</sub>NO<sub>7</sub>Si<sub>2</sub> ( $M^+$ ) 585.3517, found 585.3514.

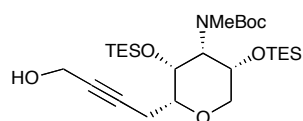

**tert-Butyl (2R,3R,4R,5S)-Tetrahydro-3,5-bis(triethylsilyloxy)-2-(4-hydroxybut-2-ynyl)-2H-pyran-4-ylmethylcarbamate (**17**):**

To an ice-cooled solution of the acetate (1.74 g, 2.97 mmol) in MeOH (30 ml) was added K<sub>2</sub>CO<sub>3</sub> (410 mg, 2.97 mmol), and the mixture was stirred at room temperature for 3 h. NH<sub>4</sub>Cl (20 ml) was added and the reaction mixture was extracted with AcOEt. The extract was washed with brine, dried, concentrated, and chromatographed (SiO<sub>2</sub> 70 g, hexane/AcOEt = 3/1) to give **17** (1.72 g, 100%) as a colorless oil:  $[\alpha]_D^{24}$  -20.5° (*c* 1.02, CHCl<sub>3</sub>); FTIR (neat) 3442, 1684, 1456, 1366, 1307, 1241, 1150, 1006 cm<sup>-1</sup>; <sup>1</sup>H NMR (300 MHz, CDCl<sub>3</sub>)  $\delta$  4.24 (br, 2H), 4.10 (d, *J* = 1.8 Hz, 1H), 4.08 (d, *J* = 2.4 Hz, 1H), 4.01 (s, 1H), 3.94 (d, *J* = 12.0 Hz, 1H), 3.56 (d, *J* = 12.6 Hz, 1H), 3.46 (t, *J* = 7.1 Hz, 1H), 3.16 (s, 3H), 2.48 (m, 2H), 1.48 (s, 9H), 0.96 (m, 18H), 0.62 (m, 12H); <sup>13</sup>C NMR (75 MHz, CDCl<sub>3</sub>)  $\delta$  156.5, 82.5, 80.7, 79.8, 77.2, 74.1, 71.2, 69.7, 56.1, 51.1, 33.7, 28.4, 21.9, 7.0, 6.8, 5.1, 5.0; MS (EI)  $m/z$  246, 319, 349, 414, 458 (100), 543 ( $M^+$ ); HRMS (EI) calcd for C<sub>27</sub>H<sub>53</sub>NO<sub>6</sub>Si<sub>2</sub> ( $M^+$ ) 543.3411, found 543.3406.

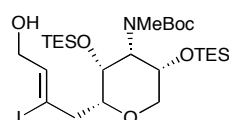

**tert-Butyl (2R,3R,4R,5S)-3,5-Bis(triethylsilyloxy)-tetrahydro-2-((Z)-4-hydroxy-2-iodobut-2-enyl)-2H-pyran-4-ylmethylcarbamate:**

To an ice-cooled solution of **17** (1.35 g, 2.48 mmol) in Et<sub>2</sub>O, was added NaH<sub>2</sub>Al(OCH<sub>2</sub>CH<sub>2</sub>OMe)<sub>2</sub> (Red-Al) (65% in toluene, 5.2 ml, 17.38 mmol). After stirring at 0° C for 2 h, additional Red-Al (65% in toluene, 1.5 ml, 4.96 mmol) was added, and the mixture was stirred at room temperature for 18 h. The reaction mixture was cooled to 0 °C and AcOEt (1.7 ml, 17.4 mmol) was added. After being stirred at 0 °C for 10 min, the mixture was cooled to -40 °C and solid I<sub>2</sub> (945 mg, 3.72 mmol) was added. The reaction mixture was allowed to warm up to room temperature and stirred at room temperature for 2 h. The reaction was quenched with saturated Na<sub>2</sub>S<sub>2</sub>O<sub>3</sub> (5 ml) at 0 °C, and the reaction mixture was diluted with AcOEt, filtrated through Celite, washed with brine, dried, and concentrated. Purification of the residue by column chromatography (SiO<sub>2</sub> 90 g,

hexane/AcOEt = 10/1) gave the title alkenyl iodide (965 mg, 58 %) as colorless oil:  $[\alpha]_D^{24} +3.5^\circ$  ( $c$  0.93,  $\text{CHCl}_3$ ); FTIR (neat) 3436, 1685, 1456, 1364, 1241, 1147, 1009  $\text{cm}^{-1}$ ;  $^1\text{H}$  NMR (400 MHz,  $\text{CDCl}_3$ )  $\delta$  5.93 (t,  $J$  = 5.4 Hz, 1H), 4.22 (br, 2H), 4.10 (s, 1H), 4.02 (s, 1H), 3.97 (s, 1H), 3.93 (d,  $J$  = 12.0 Hz, 1H), 3.63 (d,  $J$  = 9.6 Hz, 1H), 3.51 (d,  $J$  = 12.0 Hz, 1H), 3.15 (s, 3H), 2.92 (dd,  $J$  = 10.4, 14.8 Hz, 1H), 2.36 (d,  $J$  = 14.8 Hz, 1H), 1.48 (s, 9H), 0.97 (m, 18H), 0.61 (q,  $J$  = 7.7 Hz, 12H);  $^{13}\text{C}$  NMR (75 MHz,  $\text{CDCl}_3$ )  $\delta$  156.5, 136.1, 105.9, 79.6, 78.9, 73.9, 72.7, 69.6, 67.3, 56.5, 48.0, 33.7, 28.4, 7.0, 6.8, 5.3, 5.1; MS (EI)  $m/z$  227, 246, 586 (100), 642, 671 ( $\text{M}^+$ ); HRMS (EI) calcd for  $\text{C}_{27}\text{H}_{54}\text{INO}_6\text{Si}_2$  ( $\text{M}^+$ ) 671.2535, found 671.2529.

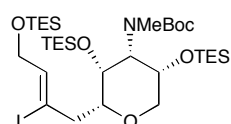

**tert-Butyl (2R,3R,4R,5S)-Tetrahydro-2-((Z)-4-triethylsilyloxy-2-iodobut-2-enyl)-3,5-bis(triethylsilyloxy)-2H-pyran-4-ylmethylcarbamate (18):**

To an ice-cooled solution of the alkenyl iodide (104 mg, 0.155 mmol) in  $\text{CH}_2\text{Cl}_2$  (1.5 ml) were added  $\text{Et}_3\text{N}$  (20 mg, 0.197 mmol), DMAP (2 mg, 0.0155 mmol), and TESCl (28 mg, 0.186 mol). After being stirred at room temperature for 11 h, the reaction mixture was diluted with hexane, washed with water and brine, dried, and concentrated. Purification of the residue by column chromatography ( $\text{SiO}_2$  18 g, hexane/AcOEt = 20/1) gave **18** (122.7 mg, 100%) as a colorless oil:  $[\alpha]_D^{25} +3.6^\circ$  ( $c$  1.04,  $\text{CHCl}_3$ ); FTIR (neat) 1686, 1457, 1345, 1240, 1148  $\text{cm}^{-1}$ ;  $^1\text{H}$  NMR (400 MHz,  $\text{CDCl}_3$ )  $\delta$  5.84 (t,  $J$  = 5.4 Hz, 1H), 4.22 (d,  $J$  = 4.9 Hz, 2H), 4.09 (s, 1H), 4.01 (s, 1H), 3.96 (s, 1H), 3.91 (d,  $J$  = 12.7 Hz, 1H), 3.60 (d,  $J$  = 10.2 Hz, 1H), 3.49 (d,  $J$  = 12.2 Hz, 1H), 3.15 (s, 3H), 2.89 (dd,  $J$  = 10.2, 14.6 Hz, 1H), 2.33 (d,  $J$  = 14.2 Hz, 1H), 1.48 (s, 9H), 0.97 (t,  $J$  = 7.8 Hz, 27H), 0.62 (m, 18H);  $^{13}\text{C}$  NMR (100 MHz,  $\text{CDCl}_3$ )  $\delta$  156.5, 136.9, 103.2, 79.6, 78.9, 73.8, 72.7, 69.7, 68.2, 56.6, 48.0, 33.6, 28.4, 7.0, 6.8, 6.7, 6.5, 5.8, 5.3, 5.2, 4.4; MS (FAB)  $m/z$  154 (100), 307, 686, 786  $[(\text{M}+\text{H})^+]$ ; HRMS (FAB) calcd for  $\text{C}_{33}\text{H}_{69}\text{INO}_6\text{Si}_3$   $[(\text{M}+\text{H})^+]$  786.3478, found 786.3447.

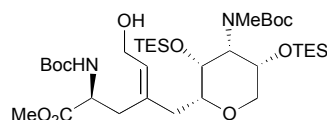

**Compound 19:** A mixture of (*R*)-*N*-Boc-3-iodoalanine methyl ester (1.4 g, 4.26 mmol) and Zn-Cu (2.29 g) in benzene (14 ml) and *N,N'*-dimethylacetamide (DMA) (1.4 ml) was sonicated at 45  $^\circ\text{C}$  until the starting material disappeared on TLC. This mixture of

the organozinc reagent was added to a degassed mixture of **18** (1.11 g, 1.41 mmol) and  $(\text{PPh}_3)_4\text{Pd}$  (326 mg, 0.282 mmol) in benzene (14 ml) and HMPA (1.4 ml), and the mixture was heated at 80  $^\circ\text{C}$  for 2 h. After cooling, the reaction mixture was diluted with AcOEt, filtered through Celite, washed with saturated  $\text{NaHCO}_3$  and brine, dried, concentrated, and chromatographed ( $\text{SiO}_2$  96 g, hexane/AcOEt = 12/1) to give the coupling product accompanied by some decomposed products as a yellow oil (1.59 g).

To a solution of the coupling product (1.59 g) in THF (16 ml) were added AcOH (102 mg, 1.69 mmol) and TBAF (1.0 M in THF 1.27 ml, 1.27 mmol), and the mixture was stirred at room temperature for 1h. The reaction mixture was diluted with AcOEt, washed with saturated  $\text{NaHCO}_3$  and brine, dried, and concentrated. The residue was chromatographed ( $\text{SiO}_2$  64g, hexane/AcOEt = 4/1-2/1) to give **19** (959 mg, 91%) as a colorless oil:  $[\alpha]_D^{23} +5.9^\circ$  ( $c$  0.97,  $\text{CHCl}_3$ ); FTIR (neat) 3357, 1687, 1455, 1365, 1240, 1148, 1049, 1006  $\text{cm}^{-1}$ ;  $^1\text{H}$  NMR (500 MHz,  $\text{CDCl}_3$ )  $\delta$  5.67 (t,  $J$  = 7.5 Hz, 1H), 5.39 (brd,  $J$  = 7.5 Hz, 1H), 4.41 (br, 1H), 4.12 (d,  $J$  = 7.5 Hz, 2H), 4.02 (d,  $J$  = 12.5 Hz, 2H), 3.92 (d,  $J$  = 12.5 Hz, 2H), 3.73 (s, 3H), 3.46 (d,  $J$  = 12.0 Hz, 1H), 3.39 (d,  $J$  = 10.5 Hz, 1H), 3.15 (s, 3H), 2.67 (br, 1H), 2.48 (m, 2H), 1.95 (d,  $J$  = 14.0 Hz, 1H), 1.47 (s, 9H), 1.42 (s, 9H), 0.98 (m, 18H), 0.61 (m, 12H);  $^{13}\text{C}$  NMR (100 MHz,  $\text{CDCl}_3$ )  $\delta$  173.3, 156.4, 155.4, 137.1, 129.1, 80.7, 79.9, 79.5, 73.3, 69.5, 58.3, 56.5, 52.3, 52.1, 40.0, 33.5, 33.3, 28.4, 28.2, 7.0, 6.8, 5.3, 5.1; MS (FAB)  $m/z$  57 (100), 218, 591, 648, 748  $[(\text{M}+\text{H})^+]$ ; HRMS (FAB) calcd for  $\text{C}_{36}\text{H}_{71}\text{N}_2\text{O}_{10}\text{Si}_2$   $[(\text{M}+\text{H})^+]$  747.4648, found

747.4655.

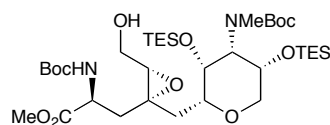

**Compound 20:** To a suspension of powdered 4 Å molecular sieves (930 mg) in  $\text{CH}_2\text{Cl}_2$  were added (+)-diisopropyl L-tartrate (DIPT) (29 mg, 0.126 mmol) and  $\text{Ti}(\text{O}-i\text{-Pr})_4$  (32 mg, 0.113 mmol) at  $-35^\circ\text{C}$ , and the mixture was stirred at  $-35^\circ\text{C}$  for 50 min. *tert*-Butyl hydroperoxide (TBHP) (2.86 M in  $\text{CH}_2\text{Cl}_2$ , 0.88 ml, 2.51 mmol) was added, and then 70 min later, a solution of **19** (938 mg, 1.26 mmol) in  $\text{CH}_2\text{Cl}_2$  (10 ml) was added. After stirring at  $-35^\circ\text{C}$  for 15 h, 17% aqueous acetone (20 ml) was added, and the mixture was stirred at room temperature for 30 min. The reaction mixture was filtered through Celite and concentrated. The residue was dissolved into toluene, evaporated to remove the remaining TBHP by azeotropic distillation, and chromatographed ( $\text{SiO}_2$  30 g, Hexane/AcOEt = 2/1-1/1) to give **20** (755 mg, 79%) as a colorless amorphous solid.  $[\alpha]_D^{23} +3.1^\circ$  ( $c$  1.17,  $\text{CHCl}_3$ ); FTIR (neat) 3442, 1721, 1456, 1366, 1241, 1153, 1050  $\text{cm}^{-1}$ ;  $^1\text{H}$  NMR (300 MHz,  $\text{CDCl}_3$ )  $\delta$  5.29 (brd,  $J$  = 6.9 Hz, 1H), 4.50 (br, 1H), 4.00 (br, 2H), 3.88 (m, 3H), 3.72 (m, 5H), 3.47 (d,  $J$  = 12.0 Hz, 1H), 3.31 (d,  $J$  = 9.9 Hz, 1H), 3.13 (s, 3H), 3.01 (t,  $J$  = 5.7 Hz, 1H), 2.30 (m, 3H), 1.79 (m, 1H), 1.45 (s, 9H), 1.43 (s, 9H), 0.96 (m, 18H), 0.60 (q,  $J$  = 8.1 Hz, 12H);  $^{13}\text{C}$  NMR (100 MHz,  $\text{CDCl}_3$ )  $\delta$  173.2, 156.5, 155.3, 79.9, 79.6, 77.8, 73.6, 73.4, 69.5, 60.9, 60.6, 60.4, 56.4, 52.3, 51.3, 37.4, 34.0, 33.6, 28.4, 28.2, 7.0, 6.8, 5.3, 5.1; MS (FAB)  $m/z$  87, 607 (100), 764  $[(\text{M}+\text{H})^+]$ ; HRMS (FAB) calcd for  $\text{C}_{36}\text{H}_{71}\text{N}_2\text{O}_{11}\text{Si}_2$   $[(\text{M}+\text{H})^+]$  763.4596, found 763.4598.

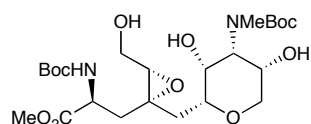

**Compound 21:** To a stirred solution of **20** (33 mg, 0.043 mmol) in THF (0.6 ml) were added AcOH (6.5 mg, 0.108 mmol) and TBAF (1.0 M in THF, 87  $\mu\text{l}$ , 0.087 mmol) at  $0^\circ\text{C}$  and the mixture was stirred at room temperature for 12 h. Additional AcOH (3.3 mg, 0.054 mmol) and TBAF (1.0 M in THF, 43  $\mu\text{l}$ , 0.043 mmol) were added at  $0^\circ\text{C}$  and stirring was continued at room temperature for 11 h. The reaction mixture was concentrated and chromatographed ( $\text{SiO}_2$  4 g, AcOEt) to give **21** (25 mg, 100%) as a colorless oil: FTIR (neat) 3432, 1693, 1367, 1166, 1098  $\text{cm}^{-1}$ ;  $^1\text{H}$  NMR (400 MHz,  $\text{CDCl}_3$ )  $\delta$  5.44 (brd,  $J$  = 7.2 Hz, 1H), 4.55 (br, 1H), 4.39 (br, 2H), 4.04-4.00 (m, 2H), 3.89 (s, 1H), 3.80-3.60 (m, 3H), 3.76 (s, 3H), 3.59 (d,  $J$  = 12.0 Hz, 1H), 3.43 (m, 1H), 3.18 (s, 3H), 3.12 (t,  $J$  = 5.8 Hz, 1H), 2.30-2.15 (m, 2H), 1.81 (m, 2H), 1.49 (s, 9H), 1.44 (s, 9H);  $^{13}\text{C}$  NMR (75 MHz,  $\text{CDCl}_3$ )  $\delta$  172.5, 156.0, 155.3, 79.9, 79.7, 76.4, 72.8, 72.4, 69.7, 60.7, 59.8, 59.4, 56.4, 52.1, 50.8, 35.8, 33.2, 32.8, 27.9; MS (FAB)  $m/z$  154, 379 (100), 435, 535  $[(\text{M}+\text{H})^+]$ ; HRMS (FAB) calcd for  $\text{C}_{24}\text{H}_{43}\text{N}_2\text{O}_{11}$   $[(\text{M}+\text{H})^+]$  535.2867, found 535.2861.

**Compound 23:** To a stirred solution of **21** (450 mg, 0.842 mmol) in  $\text{CH}_2\text{Cl}_2$  (8 ml) was added PPTS (212 mg, 0.842 mmol), and the mixture was stirred at room temperature for 9 h. The reaction was quenched with saturated  $\text{NaHCO}_3$ , and the reaction mixture was extracted with AcOEt. The extract was washed with brine, dried, and concentrated to give **22** (391 mg) as a yellow oil, which was used for the next reaction without purification.

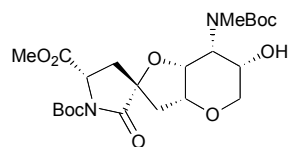

To a solution of crude **26** (391 mg) in 20% aqueous THF (4.5 ml) was added  $\text{NaIO}_4$  (386 mg, 1.85 mmol) at  $0^\circ\text{C}$ . After stirring at room temperature for 10 h, the reaction was quenched with saturated  $\text{Na}_2\text{S}_2\text{O}_3$  (3 ml), and the reaction mixture was extracted with AcOEt. The extract was washed with saturated  $\text{NaHCO}_3$  and brine, dried, concentrated, and chromatographed ( $\text{SiO}_2$  9 g, hexane/AcOEt = 1/4) to give the corresponding aminal (291 mg) as a yellow oil, which was used for next reaction without further purification.

To a solution of crude aminal (291 mg) in MeCN (10 ml) were added 4 Å molecular

sieves (300 mg), *N*-methylmorpholine *N*-oxide (NMO) (136 mg, 1.16 mmol) tetra-*n*-propylammonium perruthenate (TPAP) (41 mg, 0.116 mmol) at room temperature, and stirring was continued for 90 minutes. The reaction mixture was filtered through Celite, concentrated, and chromatographed (SiO<sub>2</sub> 17 g, hexane/AcOEt = 1/2 ~ 0/1) to give **23** (134 mg, 32%) as a colorless solid:  $[\alpha]_D^{22} +29.6^\circ$  (*c* 0.78, CHCl<sub>3</sub>); FTIR (neat) 3429, 1793, 1754, 1680, 1454, 1368, 1291, 1150 cm<sup>-1</sup>; <sup>1</sup>H NMR (500 MHz, CDCl<sub>3</sub>)  $\delta$  4.64 (brd, *J* = 12.4 Hz, 1H), 4.45 (m, 2H), 4.20 (m, 2H), 4.00 (dd, *J* = 2.1, 11.9 Hz, 1H), 3.86 (d, *J* = 12.6 Hz, 1H), 3.77 (s, 3H), 3.58 (d, *J* = 13.3 Hz, 1H), 3.18 (s, 3H), 2.48 (d, *J* = 14.2 Hz, 1H), 2.34 (dd, *J* = 7.1, 12.8 Hz, 1H), 2.30 (dd, *J* = 8.5, 12.8 Hz, 1H), 2.08 (dd, *J* = 4.3, 14.2 Hz, 1H), 1.51 (s, 9H), 1.47 (s, 9H); <sup>13</sup>C NMR (100 MHz, CDCl<sub>3</sub>)  $\delta$  172.4, 170.4, 149.1, 85.0, 84.6, 82.7, 79.8, 78.5, 72.5, 68.9, 55.0, 52.6, 42.8, 37.2, 28.4, 27.8; MS (FAB) *m/z* 154, 301 (100), 501 [(*M*+H)<sup>+</sup>], 523 [(*M*+Na)<sup>+</sup>]; HRMS (FAB) calcd for C<sub>23</sub>H<sub>37</sub>N<sub>2</sub>O<sub>10</sub> [(*M*+H)<sup>+</sup>] 501.2448, found 501.2459.

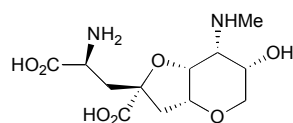

**Dysiherbaine:** A solution of **23** (28 mg, 0.056 mmol) in 6 M HCl (2.8 ml) was heated at 80 °C for 13 h. The reaction mixture was concentrated to give dysiherbaine hydrochloride (21 mg) as a pale yellow solid:  $[\alpha]_D^{23} +7.0^\circ$  (*c* 0.53 H<sub>2</sub>O); <sup>1</sup>H NMR (500 MHz, D<sub>2</sub>O)  $\delta$  4.39 (brt, *J* = 1.9 Hz, 1H), 4.22 (brs, 1H), 3.93 (br, 1H), 3.88 (dd, *J* = 2.8, 5.6 Hz, 1H), 3.86 (t, *J* = 3.0 Hz, 1H), 3.62 (t, *J* = 3.8 Hz, 1H), 3.56 (d, *J* = 13.0 Hz, 1H), 2.75 (dd, *J* = 3.4, 15.4 Hz, 1H), 2.73 (s, 3H), 2.62 (d, *J* = 14.0 Hz, 1H), 2.29 (dd, *J* = 3.5, 14.5 Hz, 1H), 2.12 (dd, *J* = 10.5, 15.4 Hz, 1H); <sup>13</sup>C NMR (100 MHz, D<sub>2</sub>O)  $\delta$  178.3, 171.9, 87.1, 76.9, 76.5, 69.6, 62.9, 56.8, 52.1, 45.4, 38.9, 30.5. These spectral data were identical with those reported for natural dysiherbaine hydrochloride.<sup>1</sup>

Dysiherbaine hydrochloride (21 mg) was treated with 10 M NaOH and subjected to ion-exchange chromatography using IRC-50 to give dysiherbaine (18 mg, 100%) as a colorless solid: HPLC (YMC-Pack ODS-AM, 1x25cm, eluent: distilled water, flow: 2.0 ml/min. detect: UV 210 nm, retention time: 8.7 min);  $[\alpha]_D^{23} -7.5^\circ$  (*c* 0.52, H<sub>2</sub>O) (lit.<sup>2</sup>  $[\alpha]_D^{26} -3.5^\circ$  (*c* 0.4, H<sub>2</sub>O)); <sup>1</sup>H NMR (500 MHz, D<sub>2</sub>O)  $\delta$  4.24 (brs, 1H), 4.08 (brs, 1H), 3.80 (dd, *J* = 2.0, 13.0 Hz, 1H), 3.78 (m, 1H), 3.47-3.44 (m, 2H), 3.43 (dd, *J* = 2.0, 11.8 Hz, 1H), 2.66 (s, 3H), 2.52 (dd, *J* = 2.0, 15.3 Hz, 1H), 2.50 (d, *J* = 14.0 Hz, 1H), 2.08 (dd, *J* = 3.5, 14.0 Hz, 1H), 1.85 (dd, *J* = 15.3, 11.8 Hz, 1H); <sup>13</sup>C NMR (100 MHz, D<sub>2</sub>O)  $\delta$  179.8, 173.4, 88.5, 76.9, 75.9, 69.5, 62.9, 57.1, 53.5, 45.2, 39.5, 30.5; MS (FAB) *m/z* 115 (100), 154, 305 [(*M*+H)<sup>+</sup>]; HRMS (FAB) calcd for C<sub>12</sub>H<sub>21</sub>N<sub>2</sub>O<sub>7</sub> [(*M*+H)<sup>+</sup>] 305.1344, found 305.1351.

## Reference

- (1) H. Masaki, J. Maeyama, K. Kameda, T. Esumi, Y. Iwabuchi and S. Hatakeyama, *J. Am. Chem. Soc.* 2000, **122**, 5216.
- (2) R. Sakai, H. Kamiya, M. Murata and K. Shimamoto, *J. Am. Chem. Soc.*, 1997, **119**, 4112.



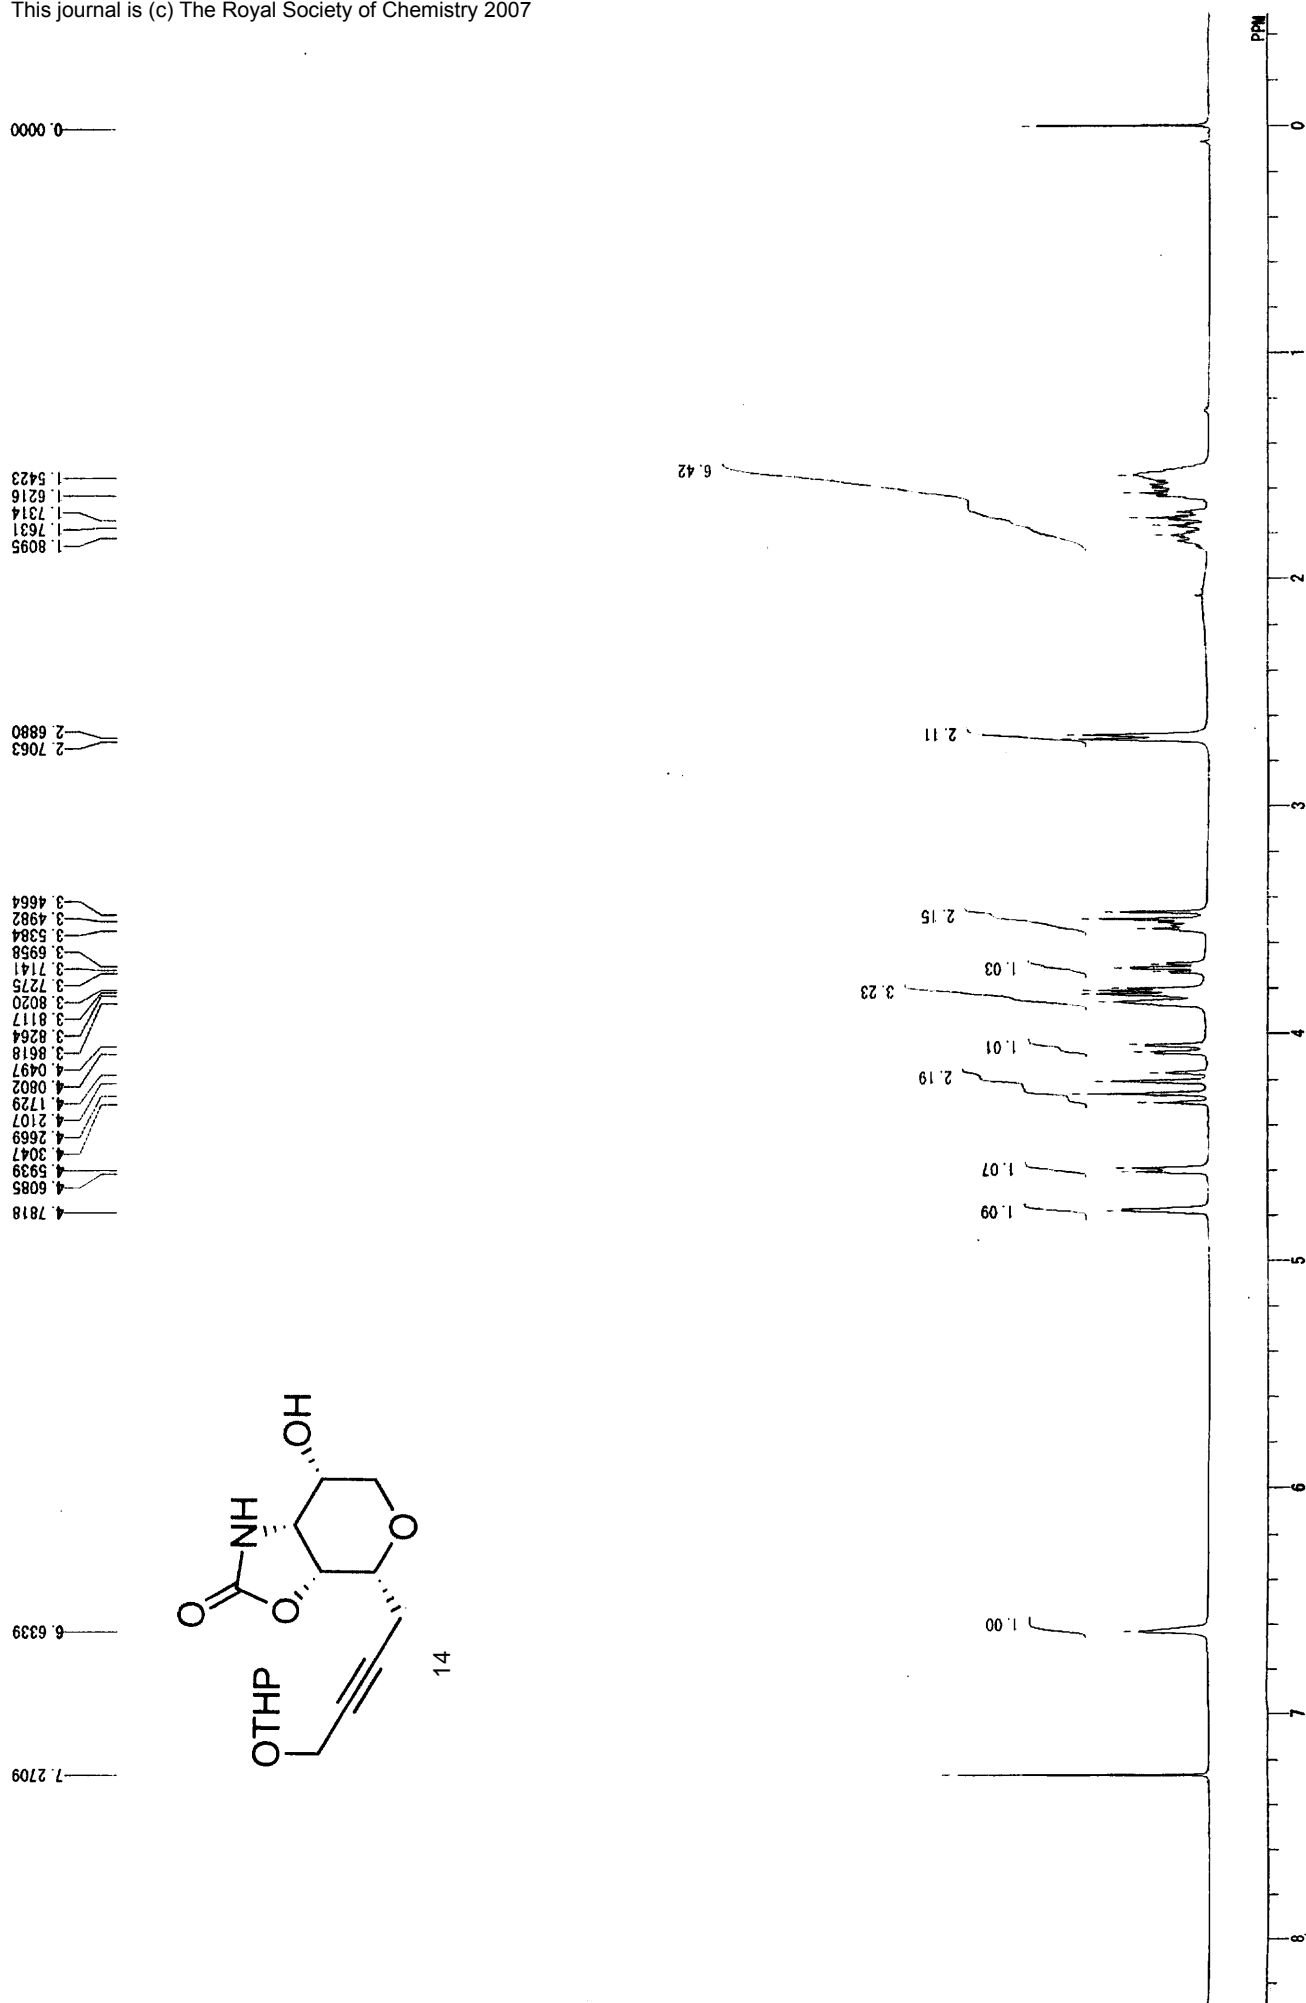

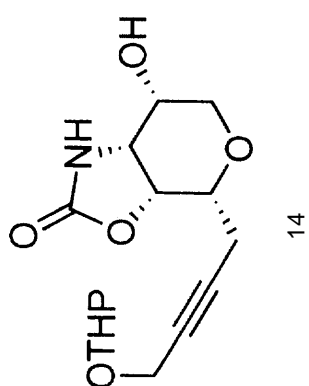

30.192  
25.259  
21.586  
19.051  
19.021

54.461  
53.307

81.098  
78.123  
77.425  
77.000  
76.575  
74.192  
74.056  
68.895  
63.674  
61.989  
62.035

96.853  
96.792

161.434

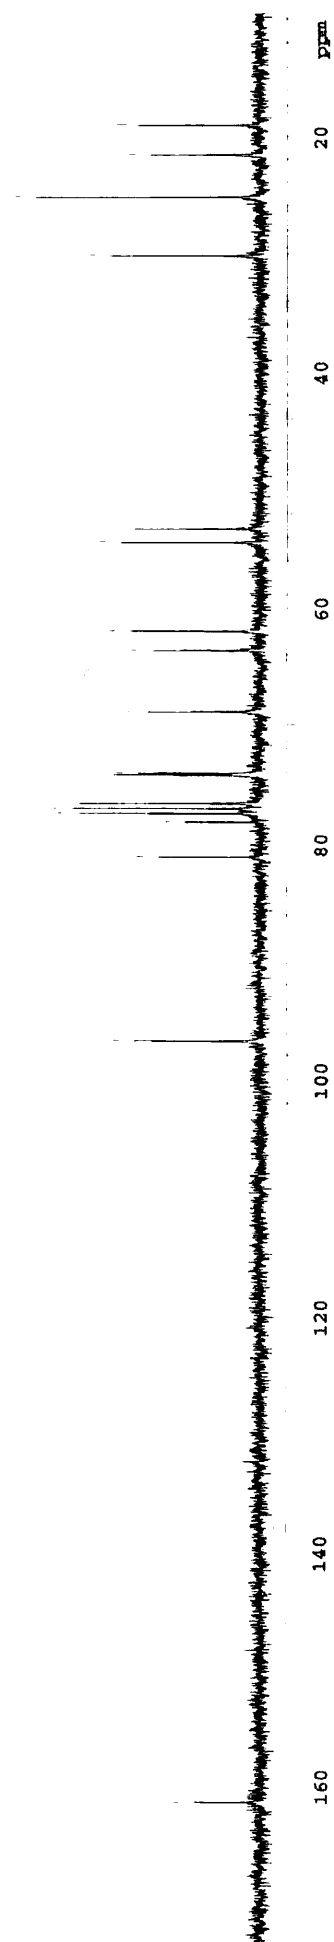

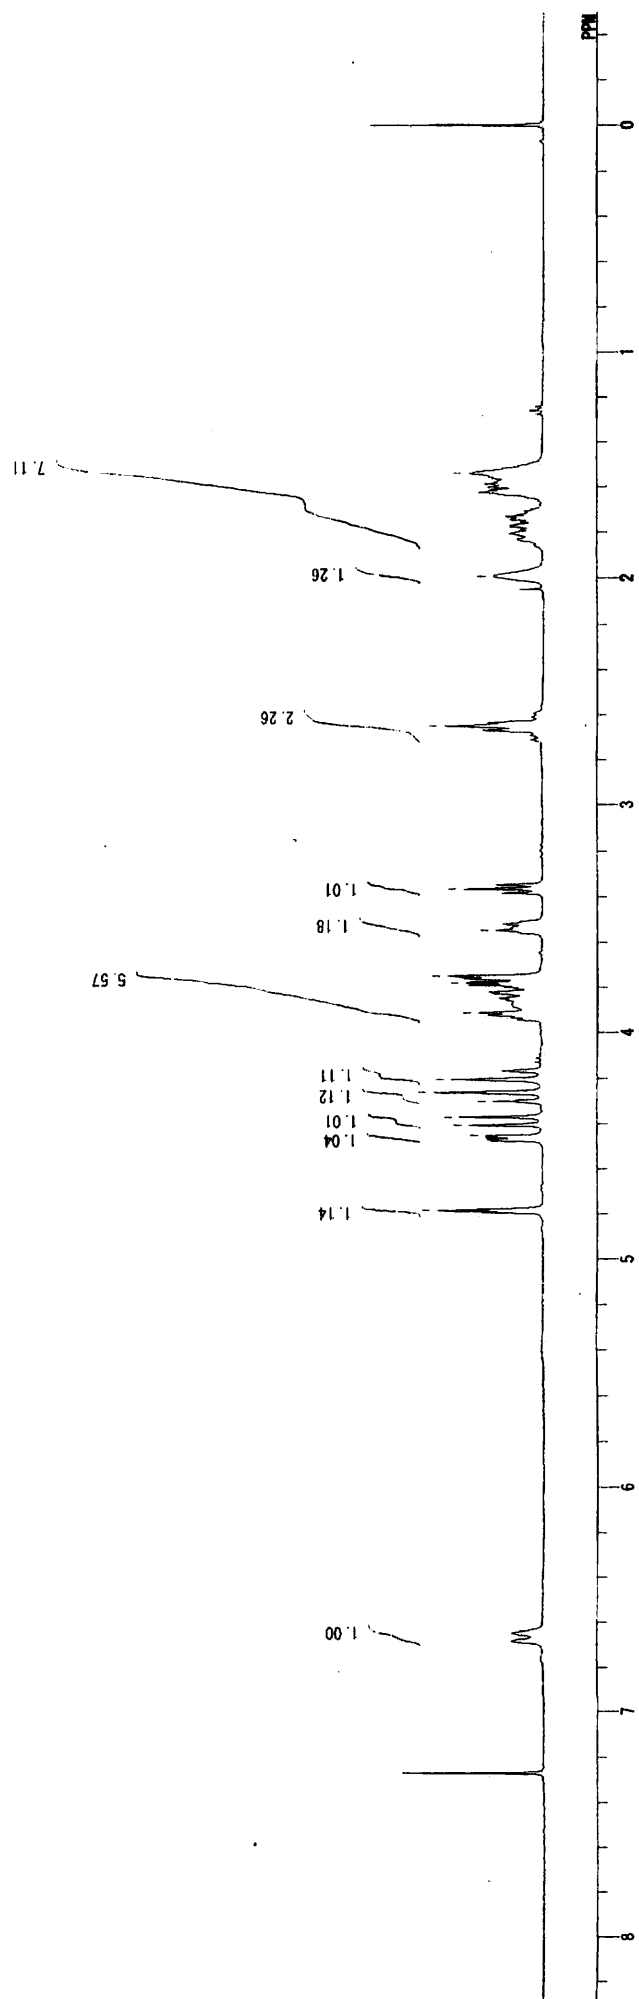

1.5410  
 1.9925  
 2.6502  
 3.3688  
 3.5482  
 3.7837  
 3.7495  
 3.9142  
 4.2083  
 4.2644  
 4.3035  
 4.3730  
 4.4084  
 4.4548  
 4.7866

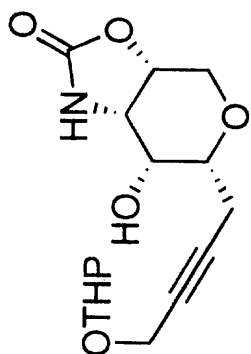

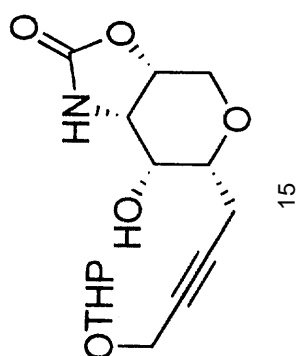

161.950

96.792  
96.716

81.933  
77.425  
77.000  
76.575  
75.649  
73.312

66.512  
65.010  
64.979  
61.989

54.506  
53.854

30.192  
30.161  
25.259  
21.571  
19.021

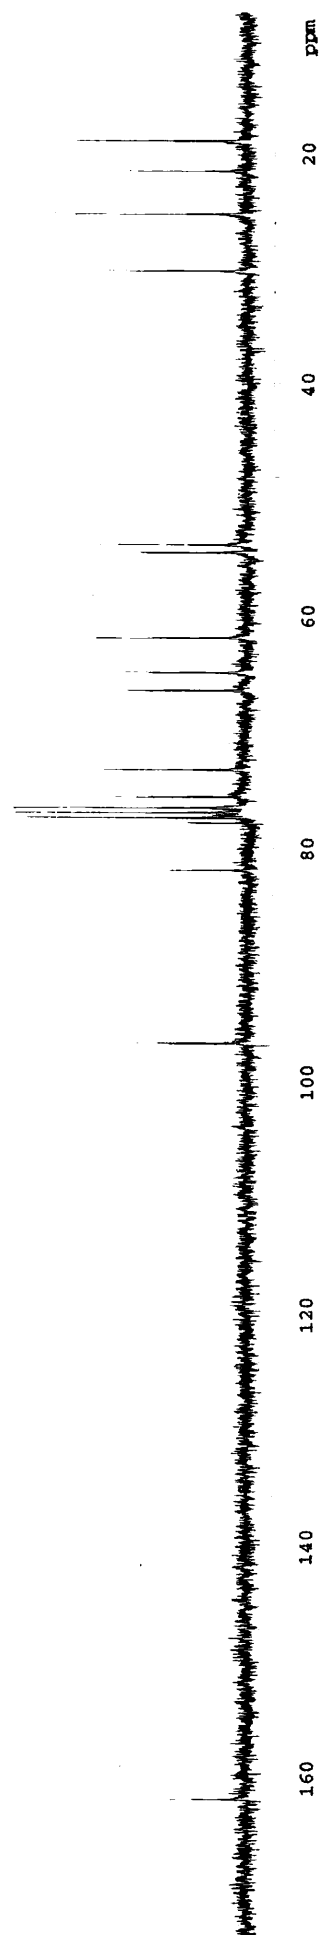

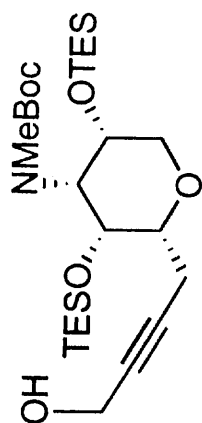

17

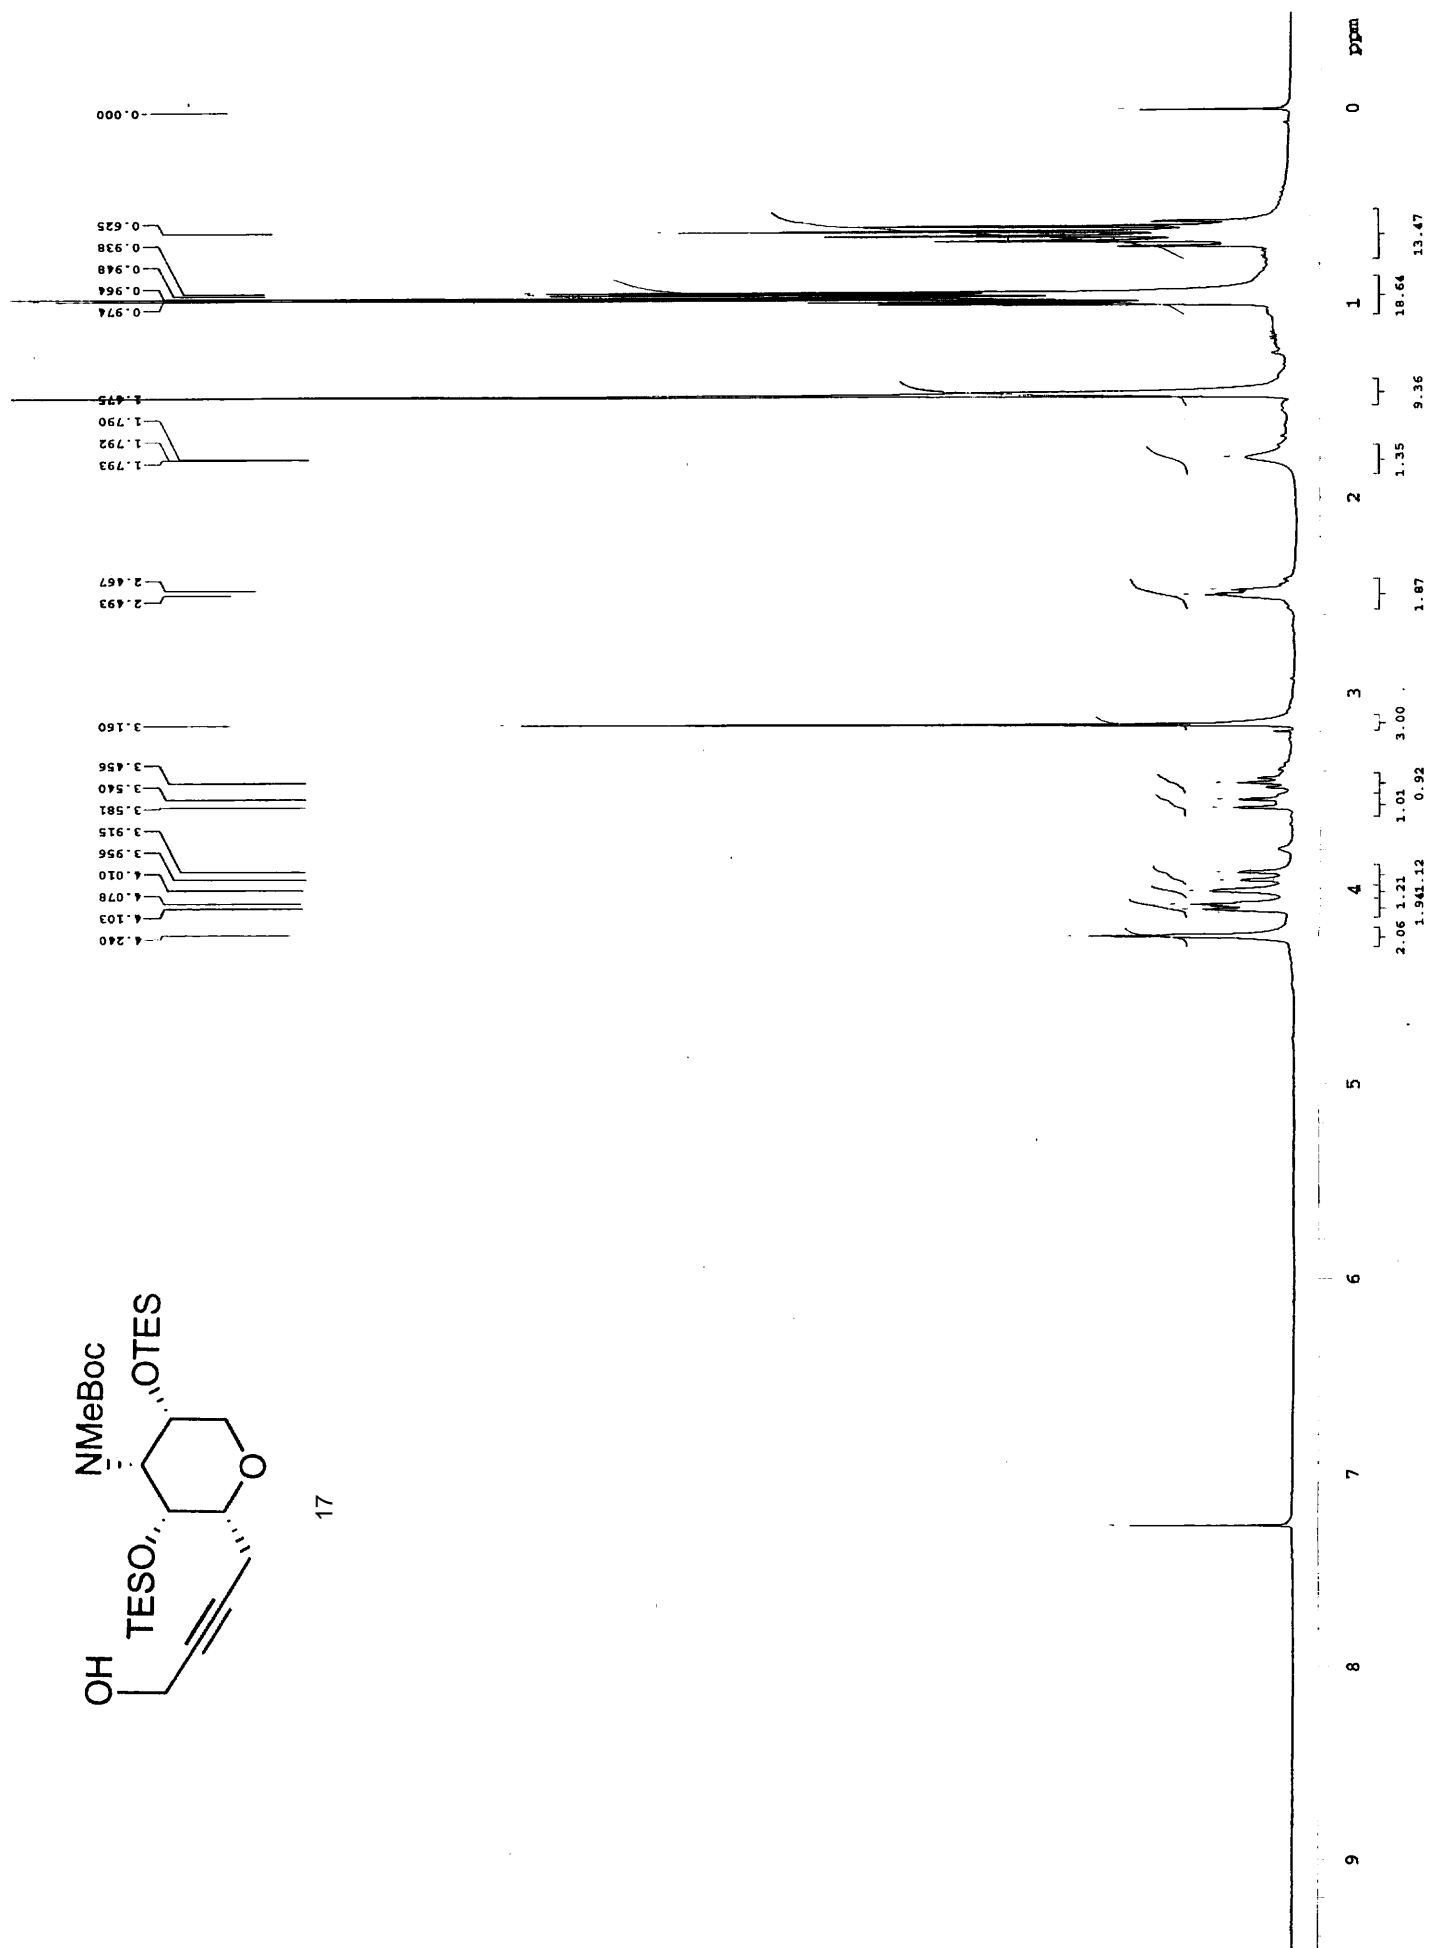

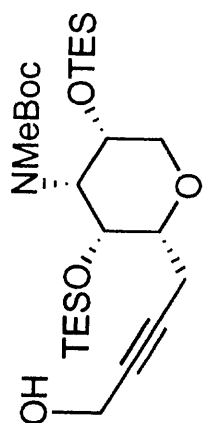

17

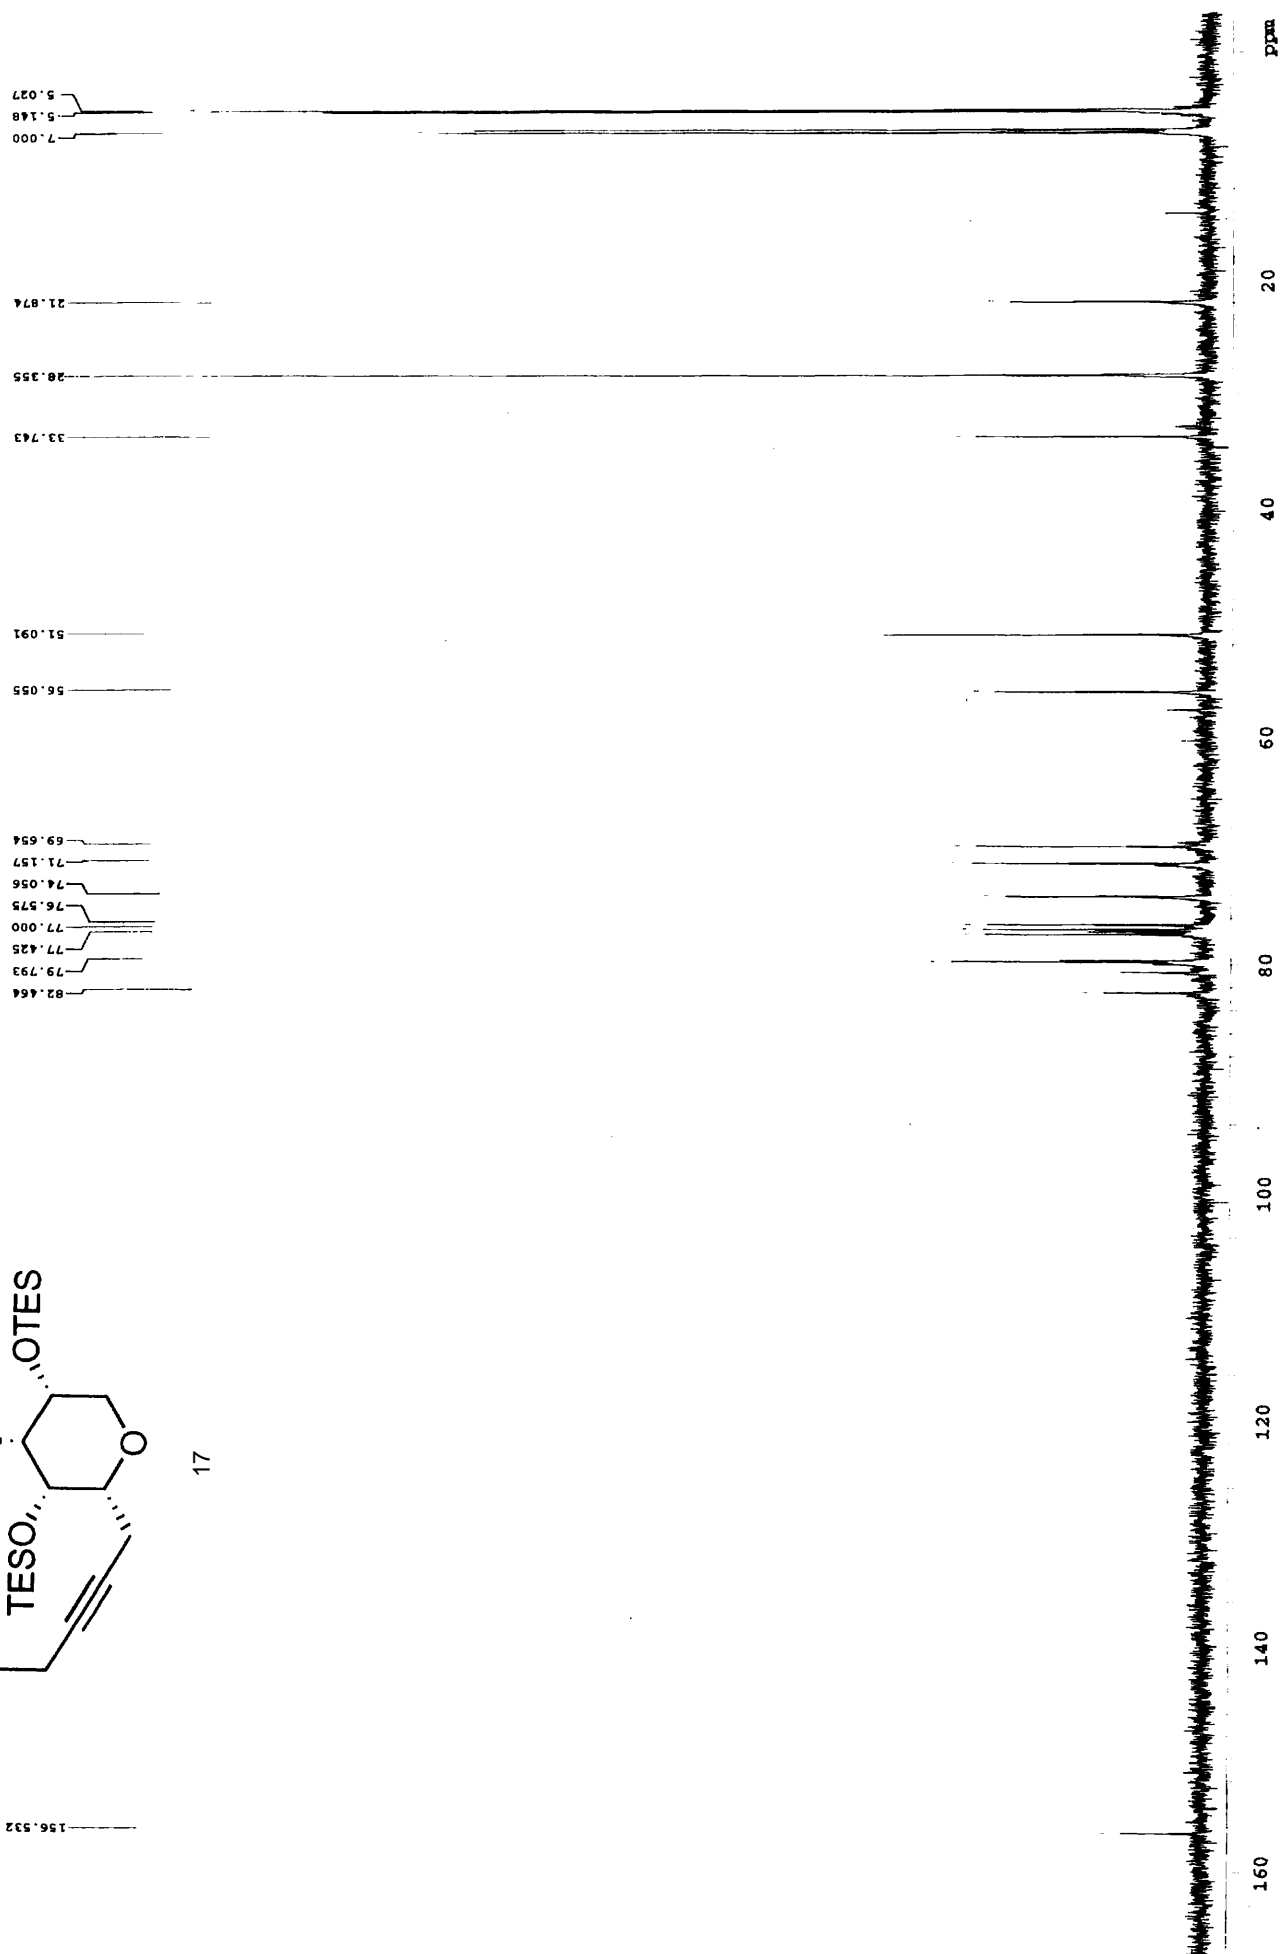

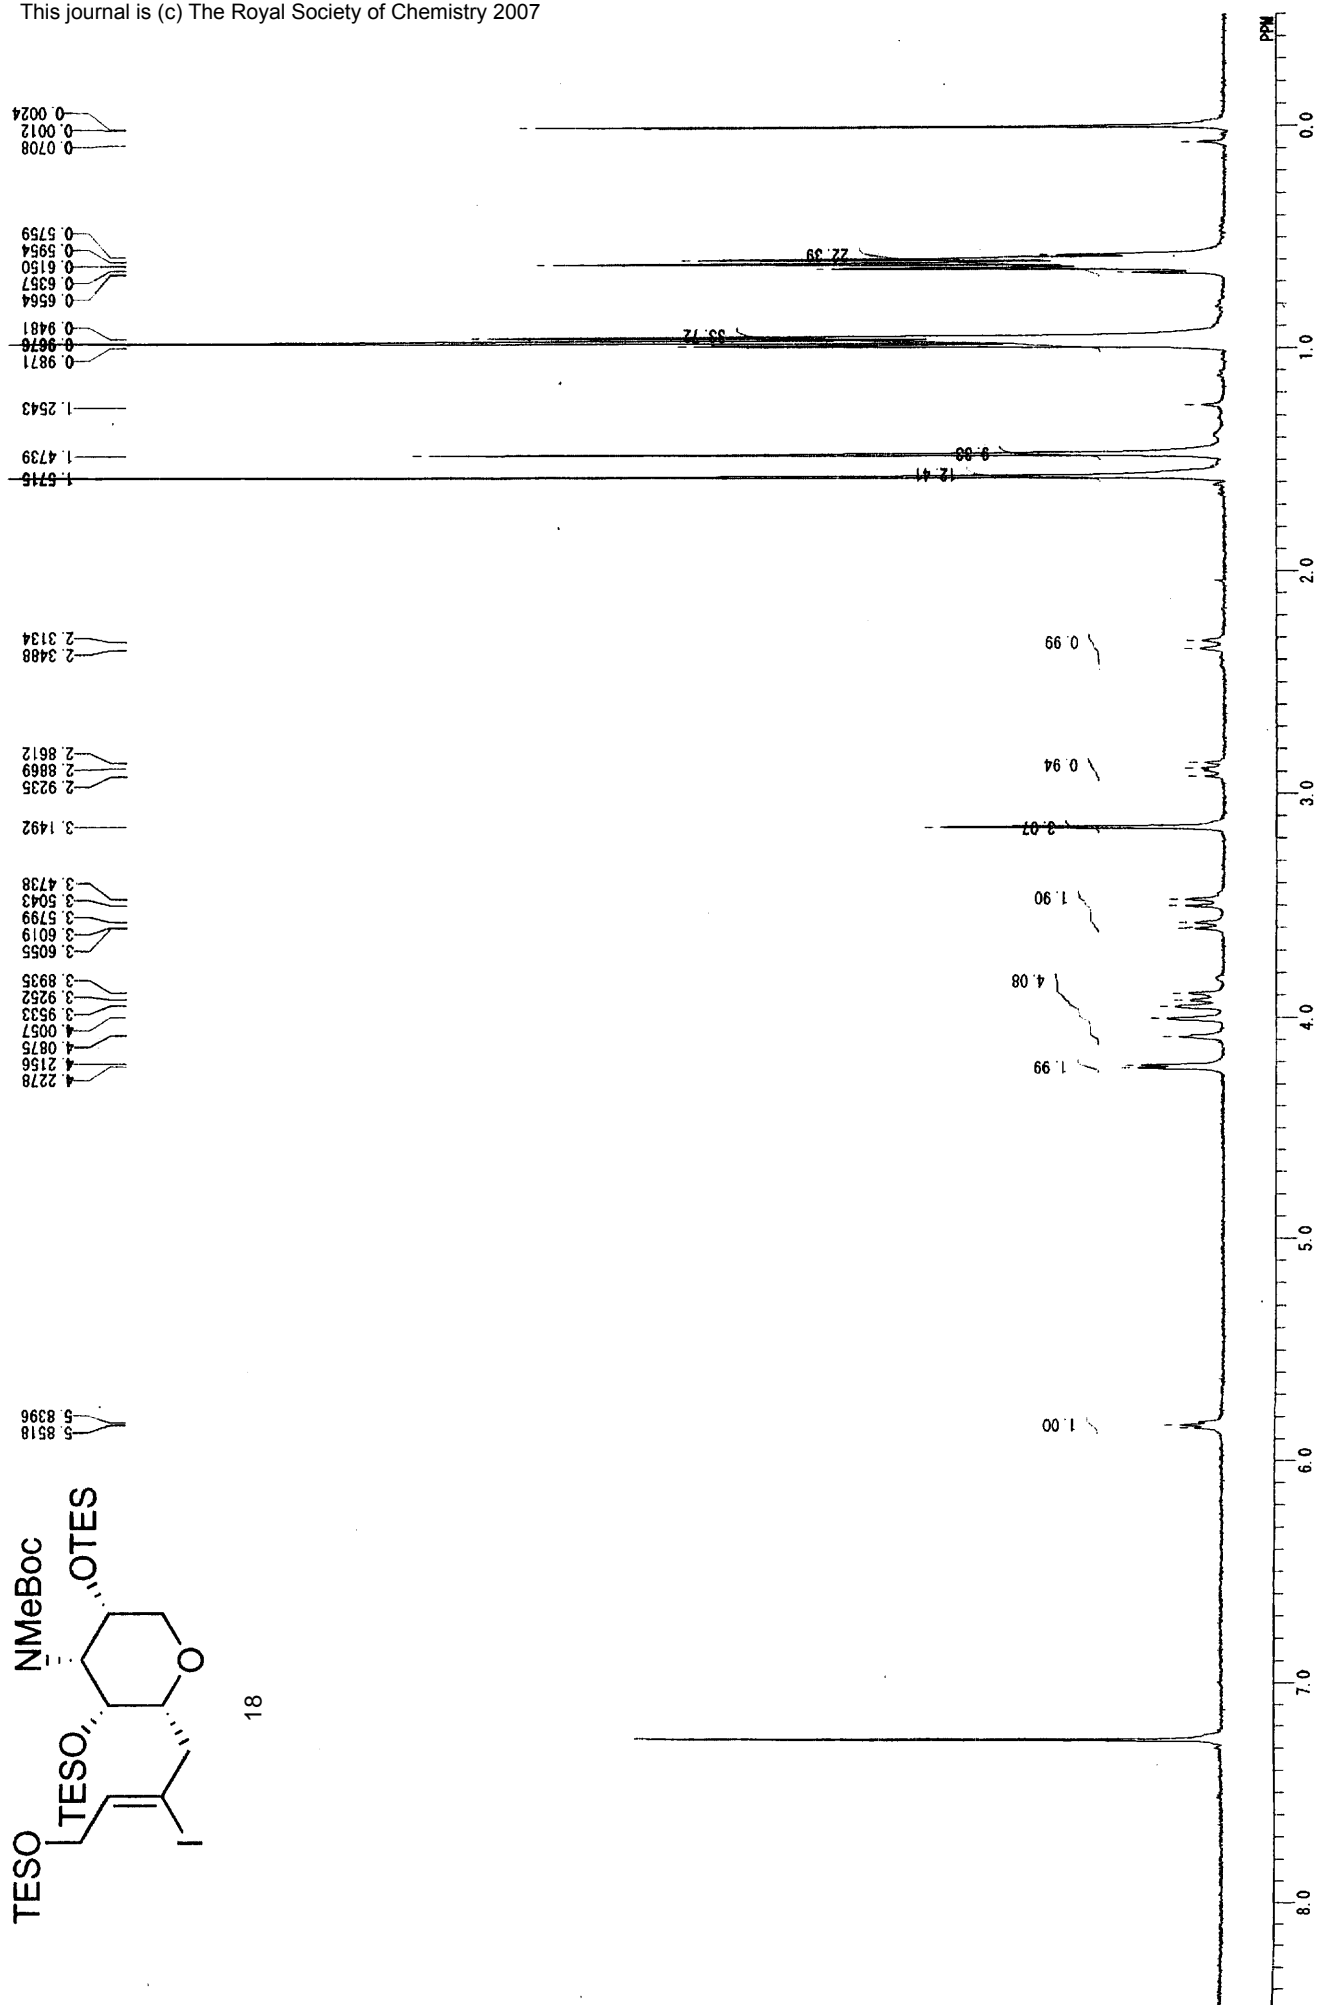

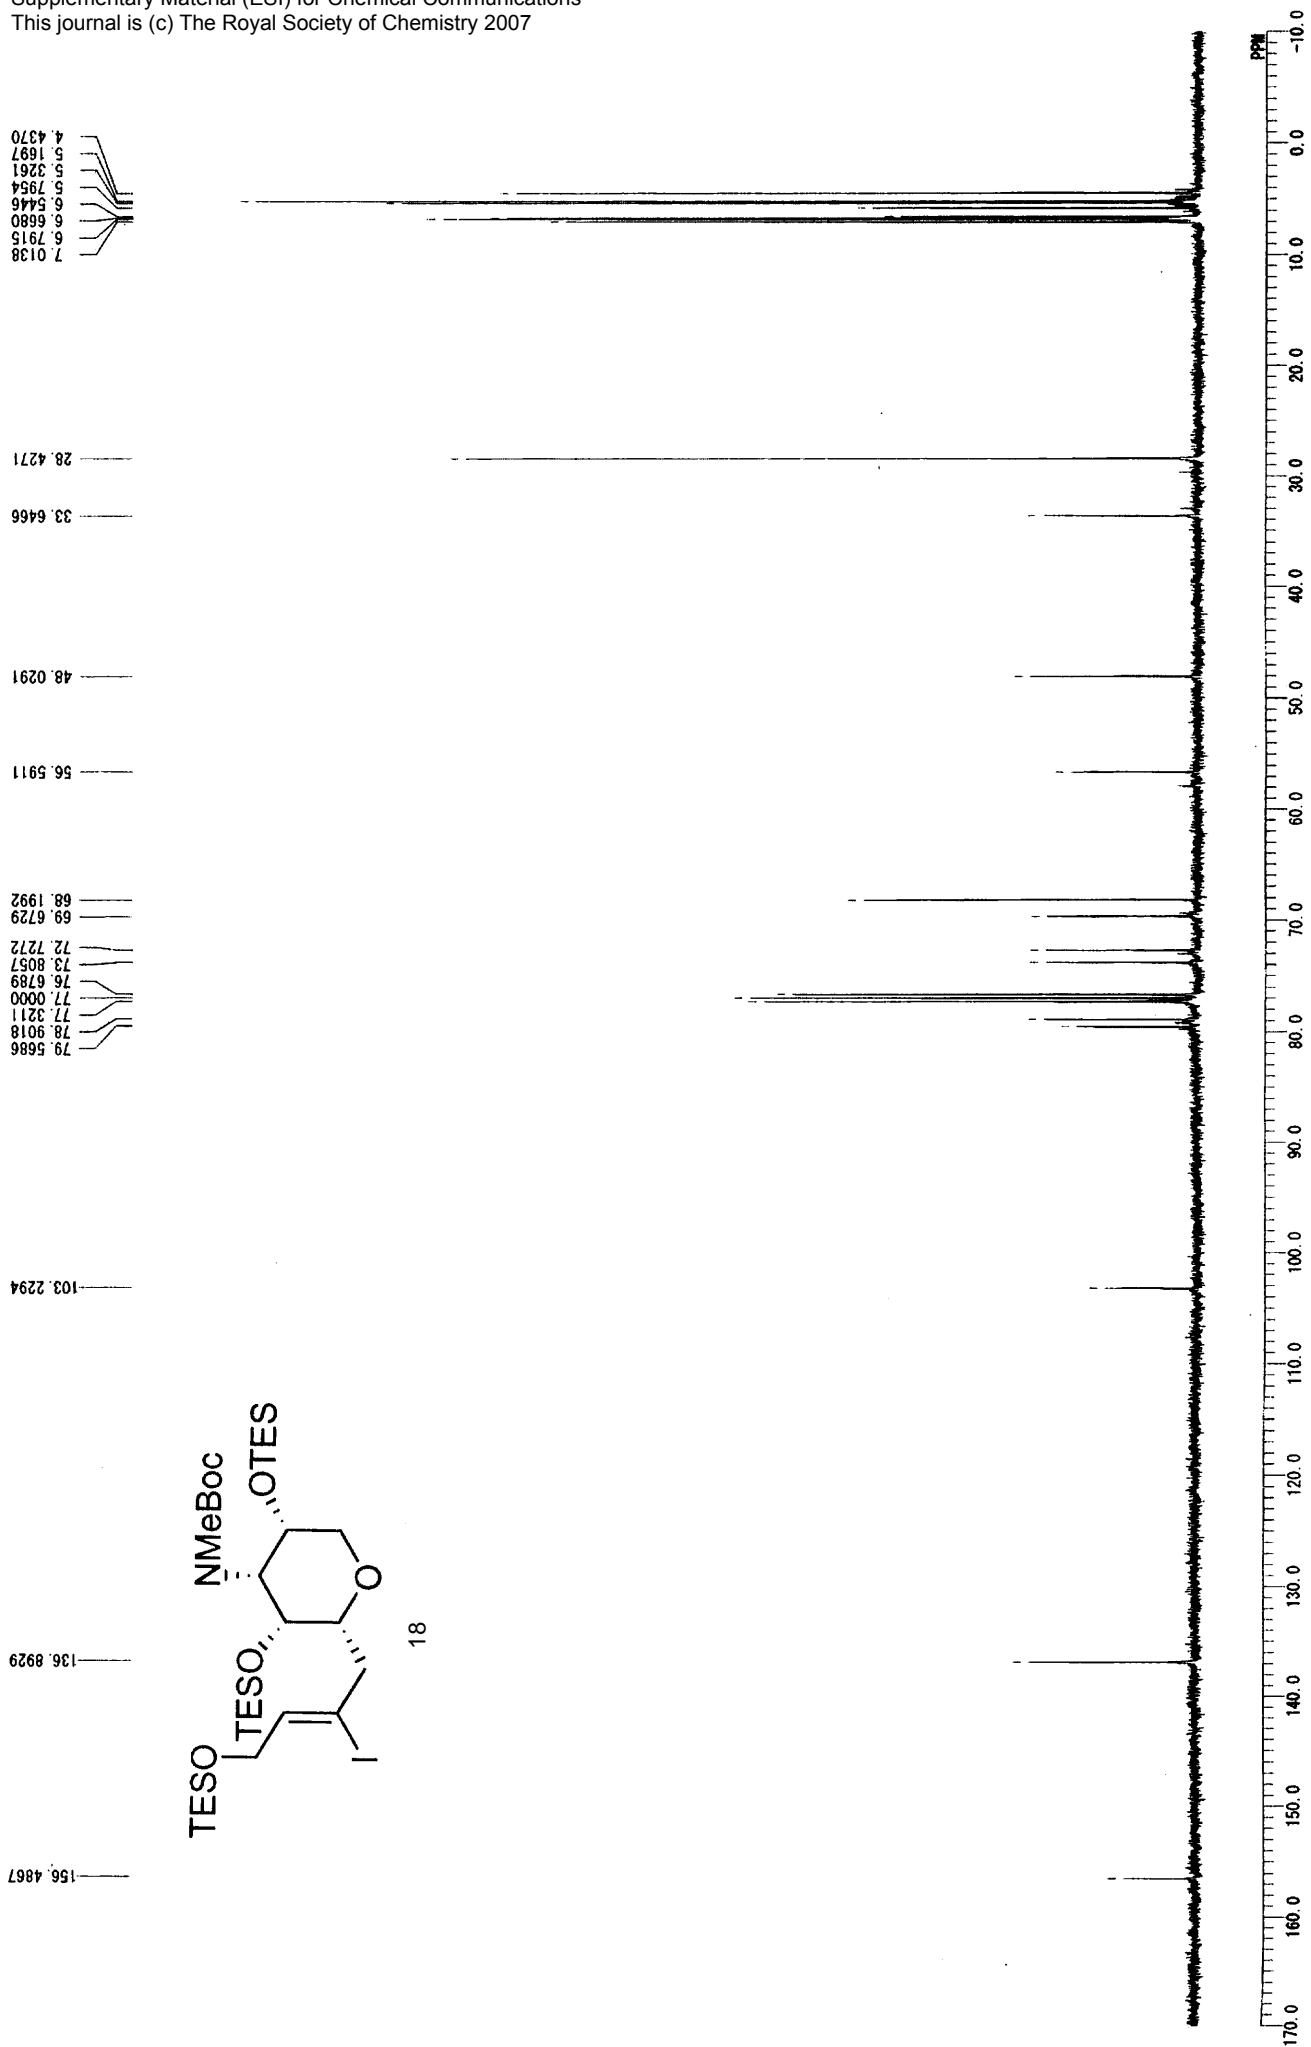



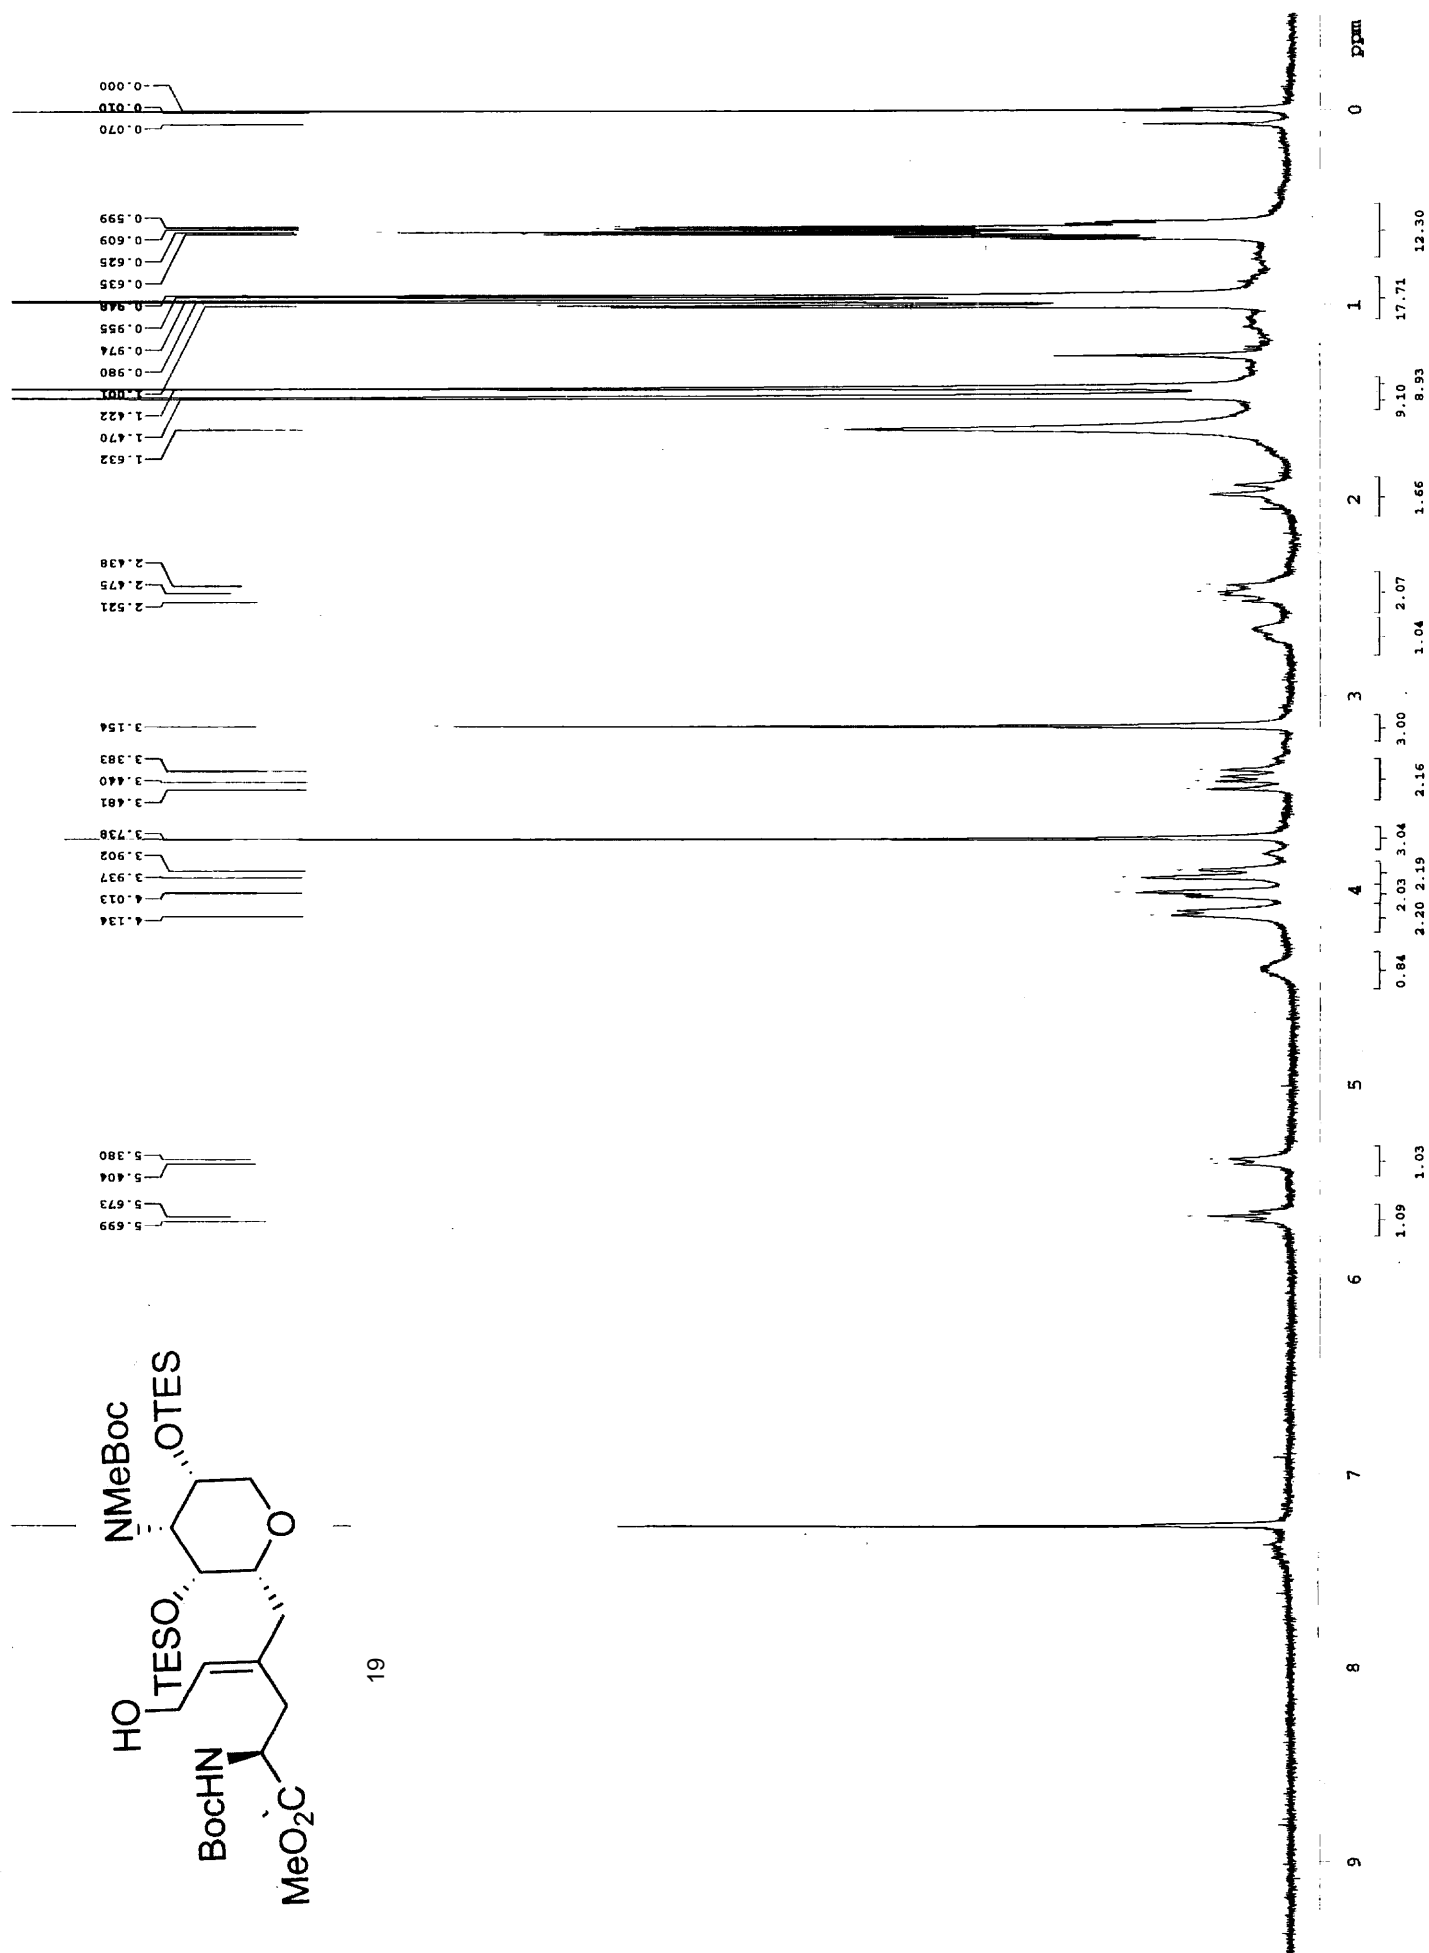

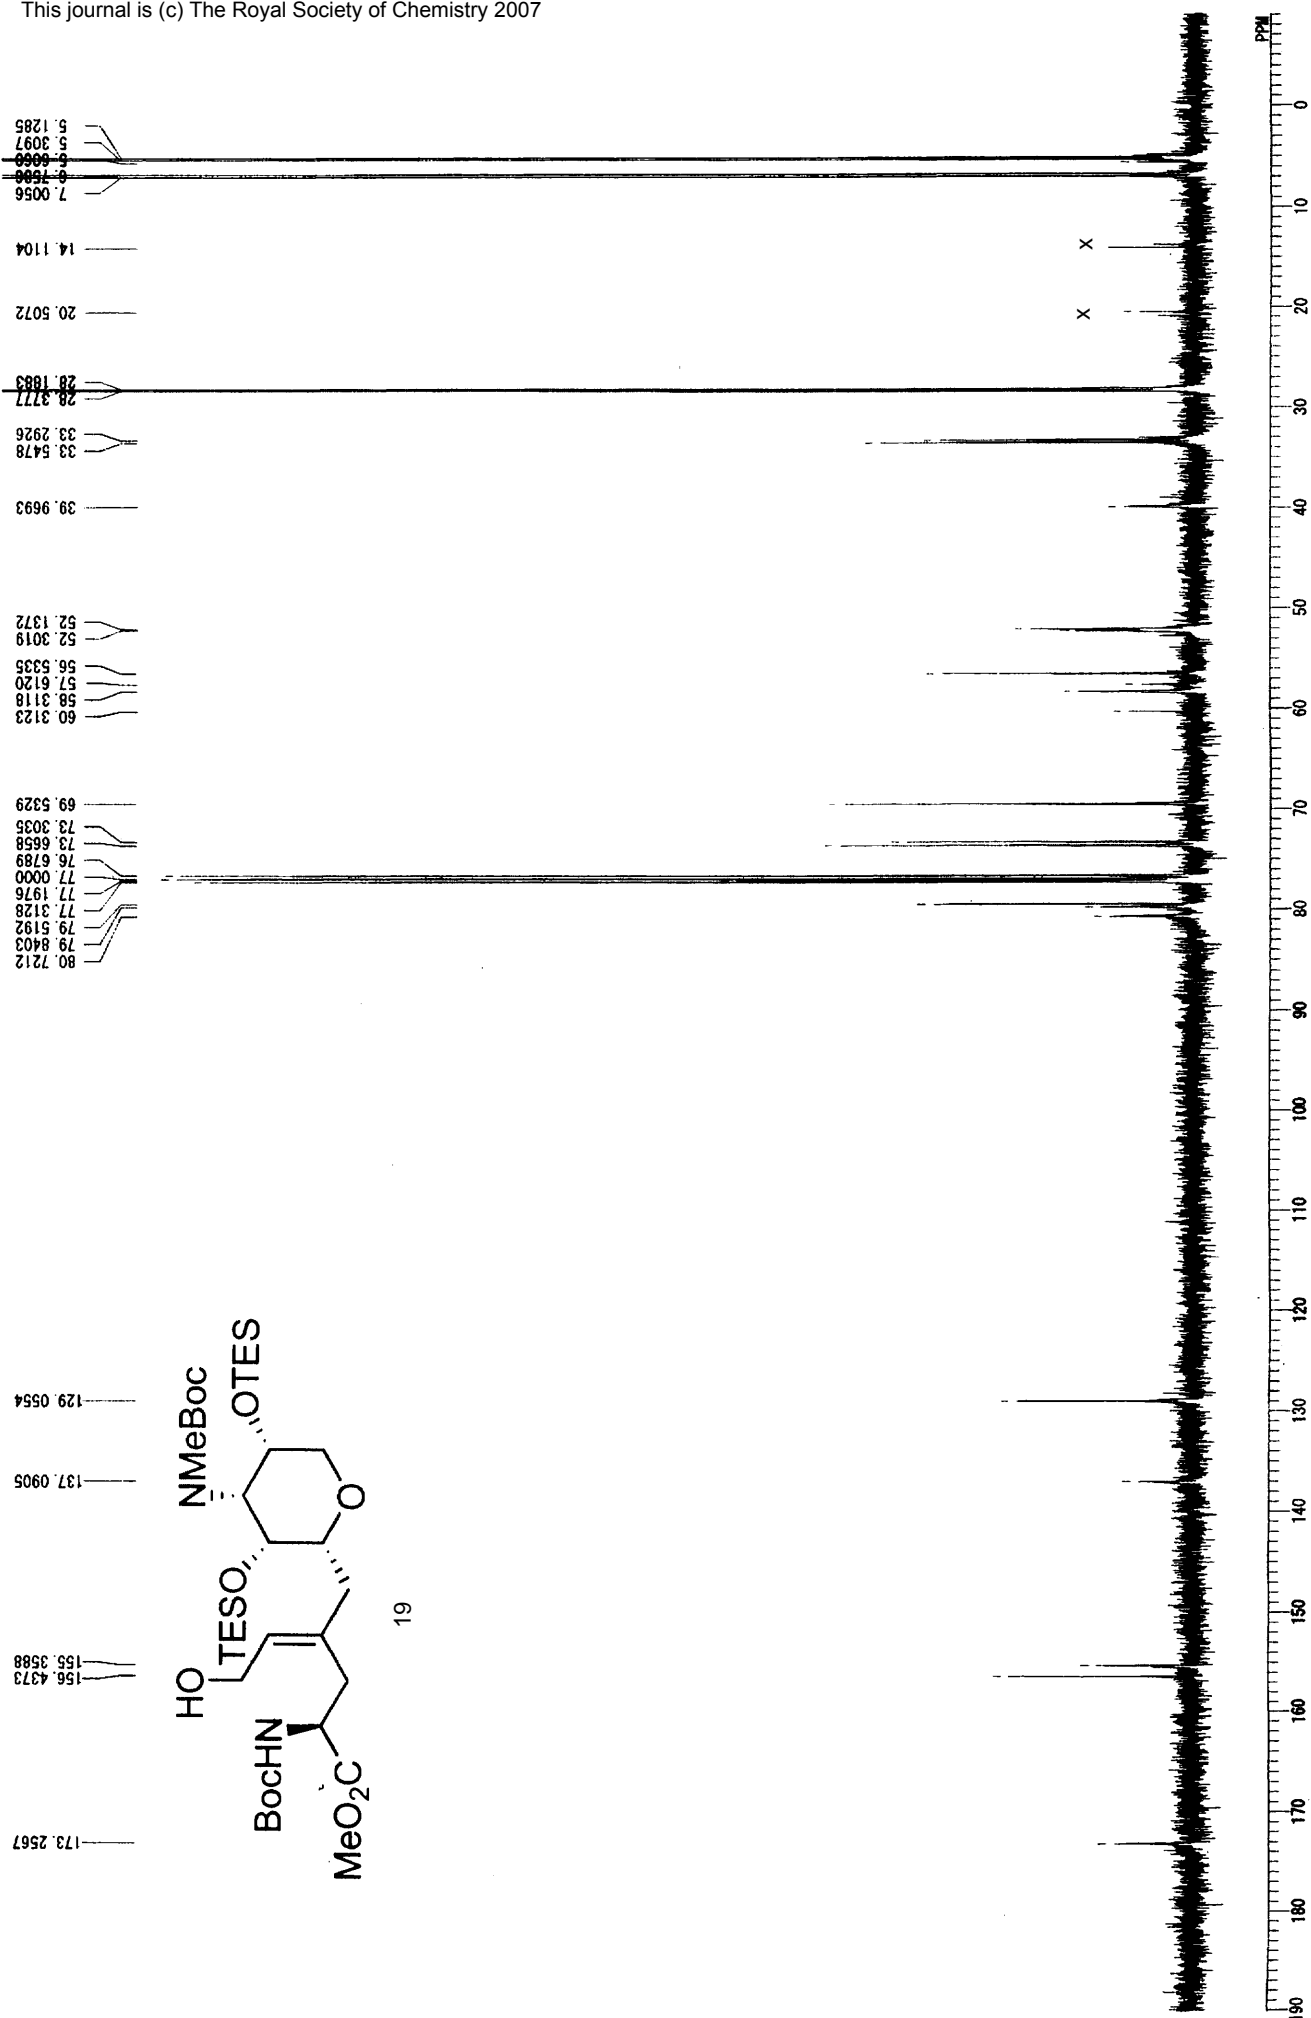

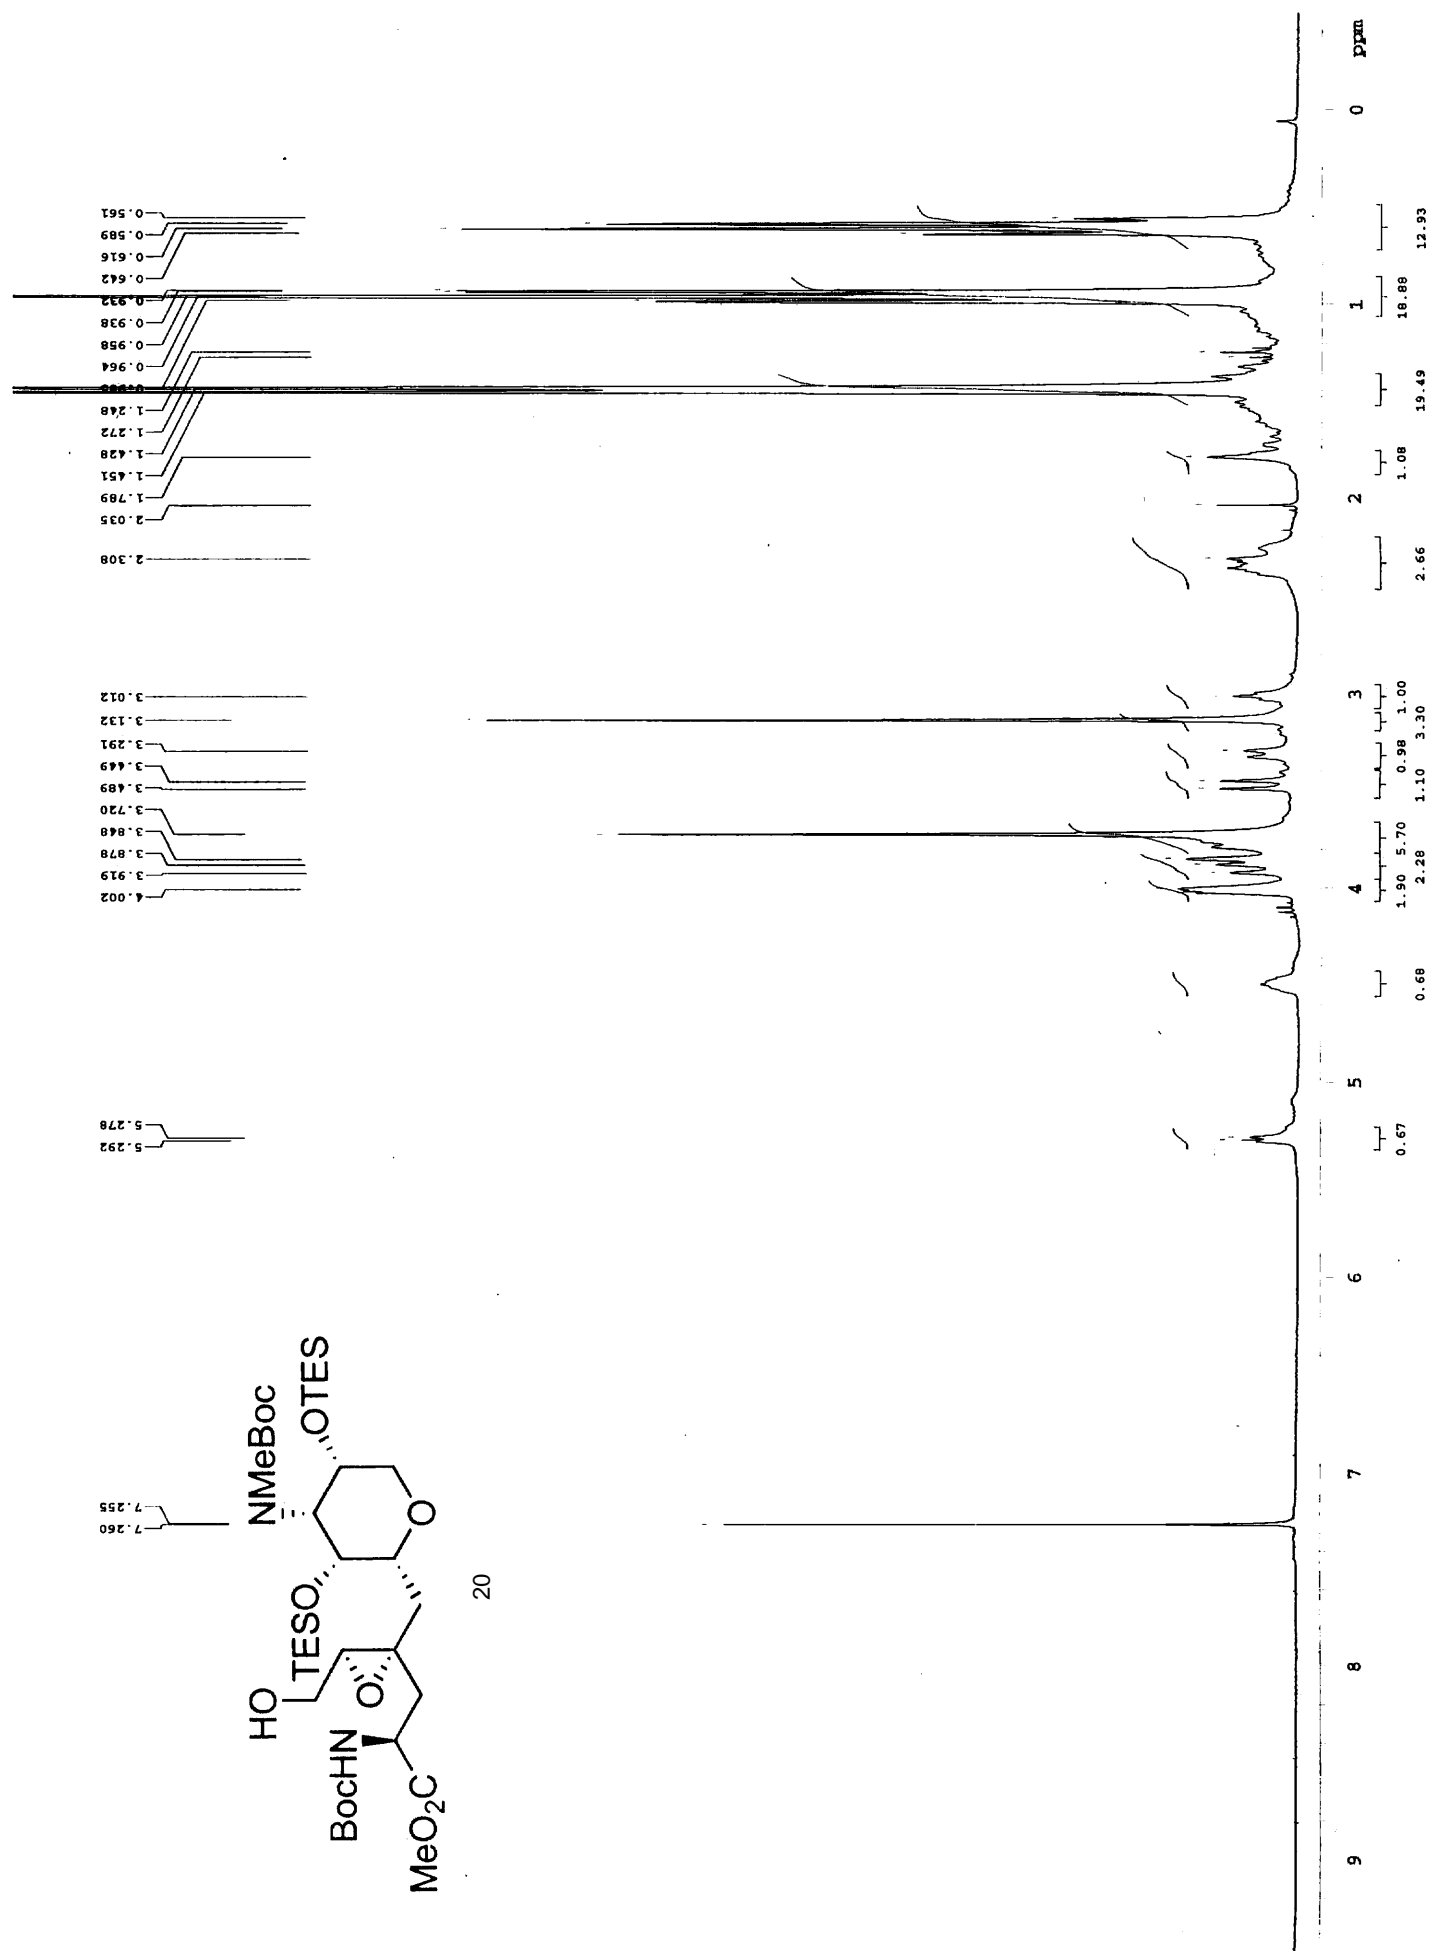

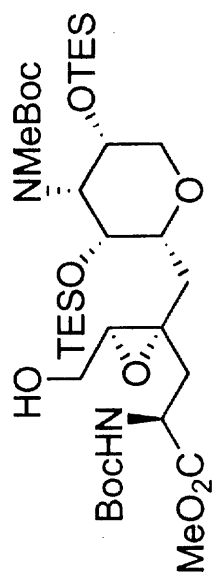

20

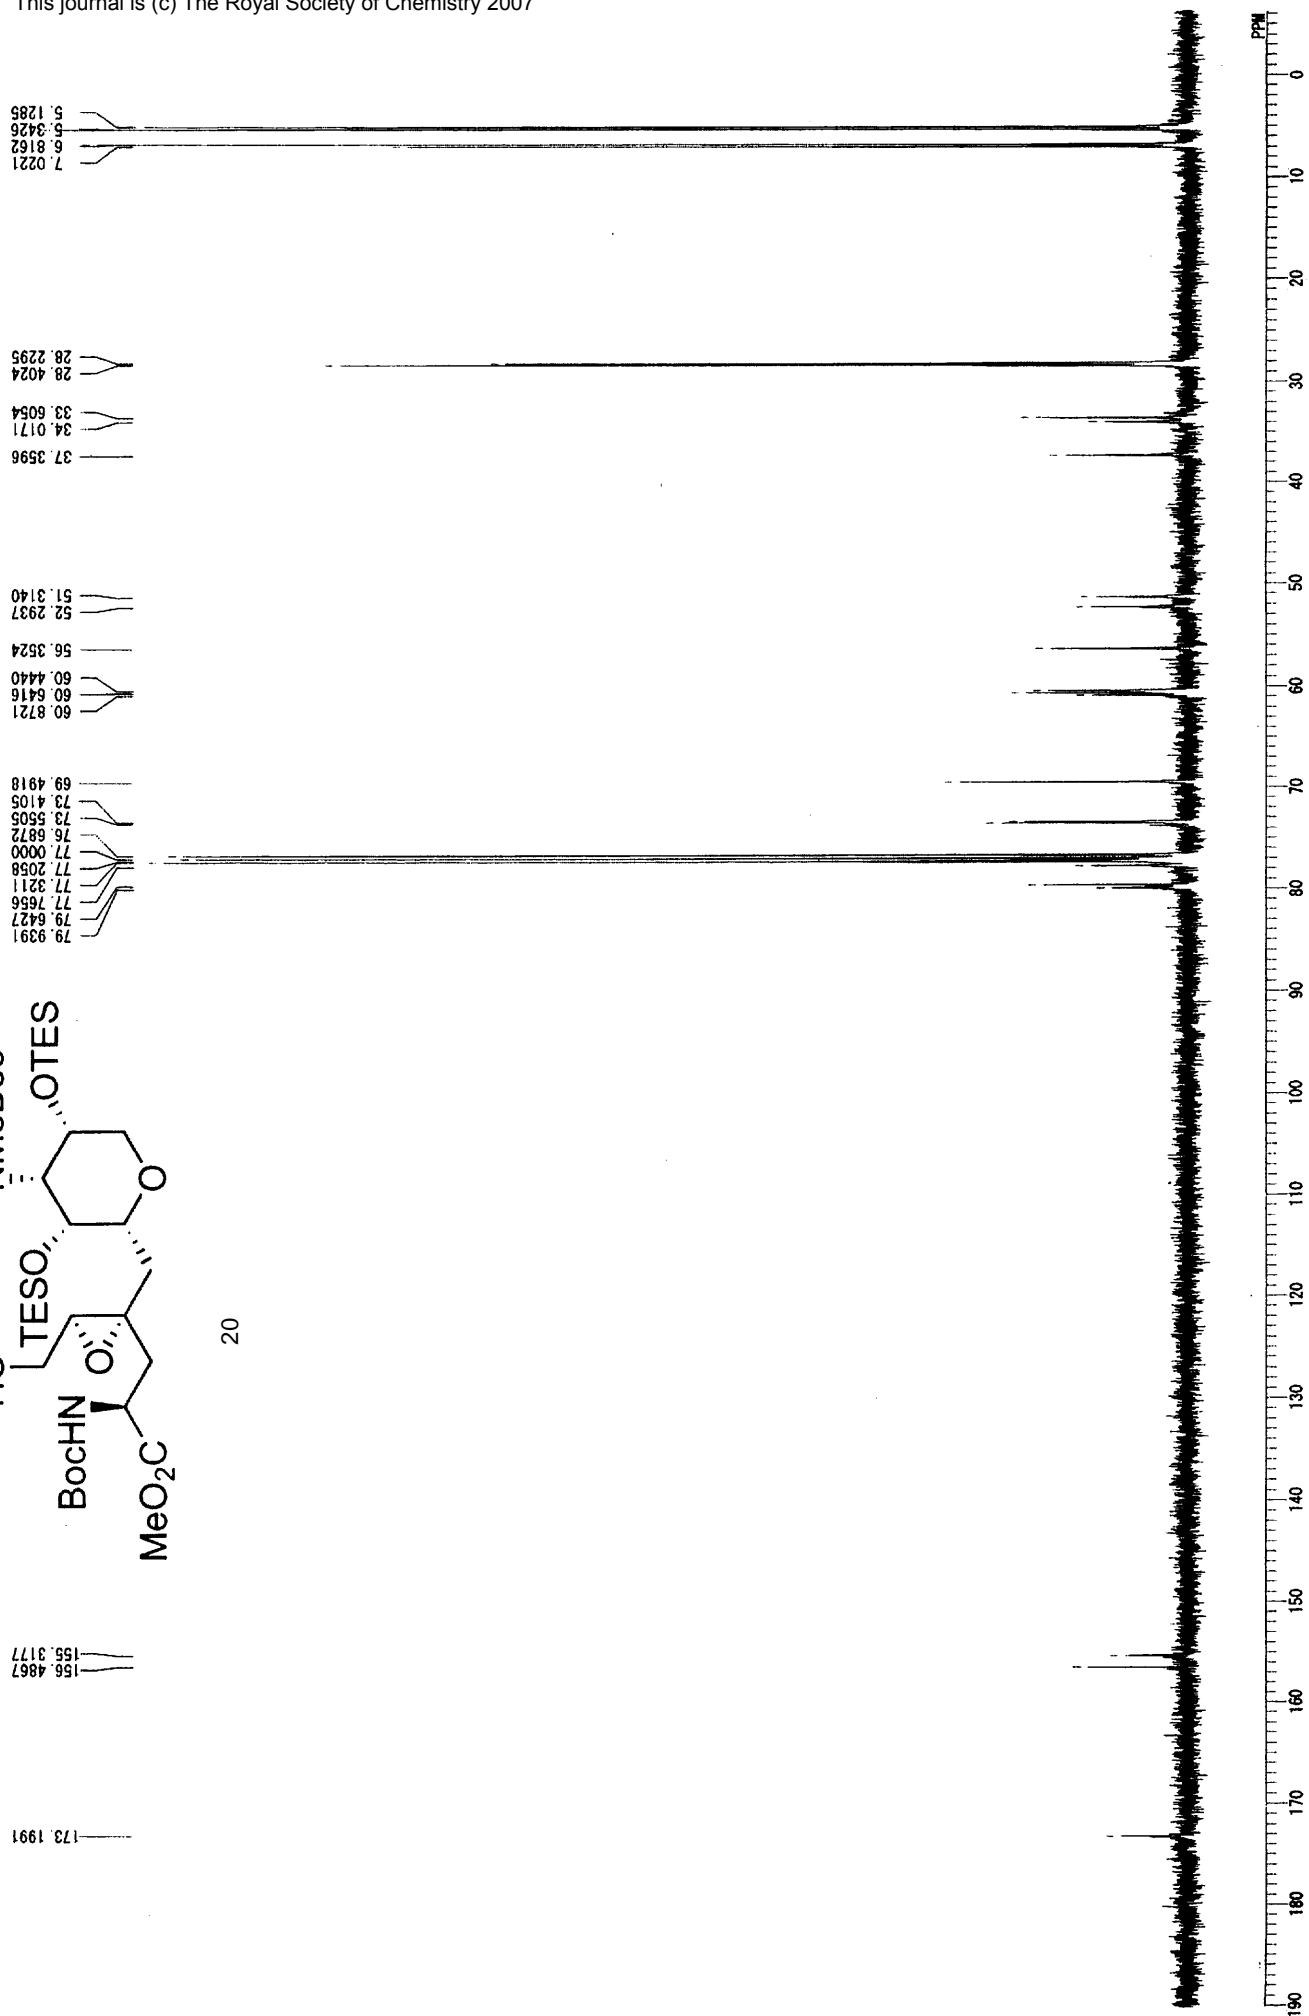

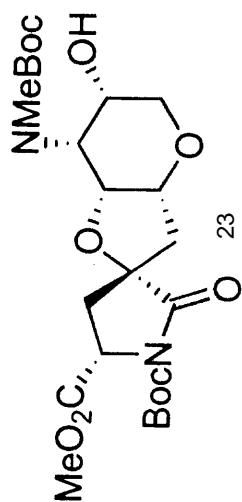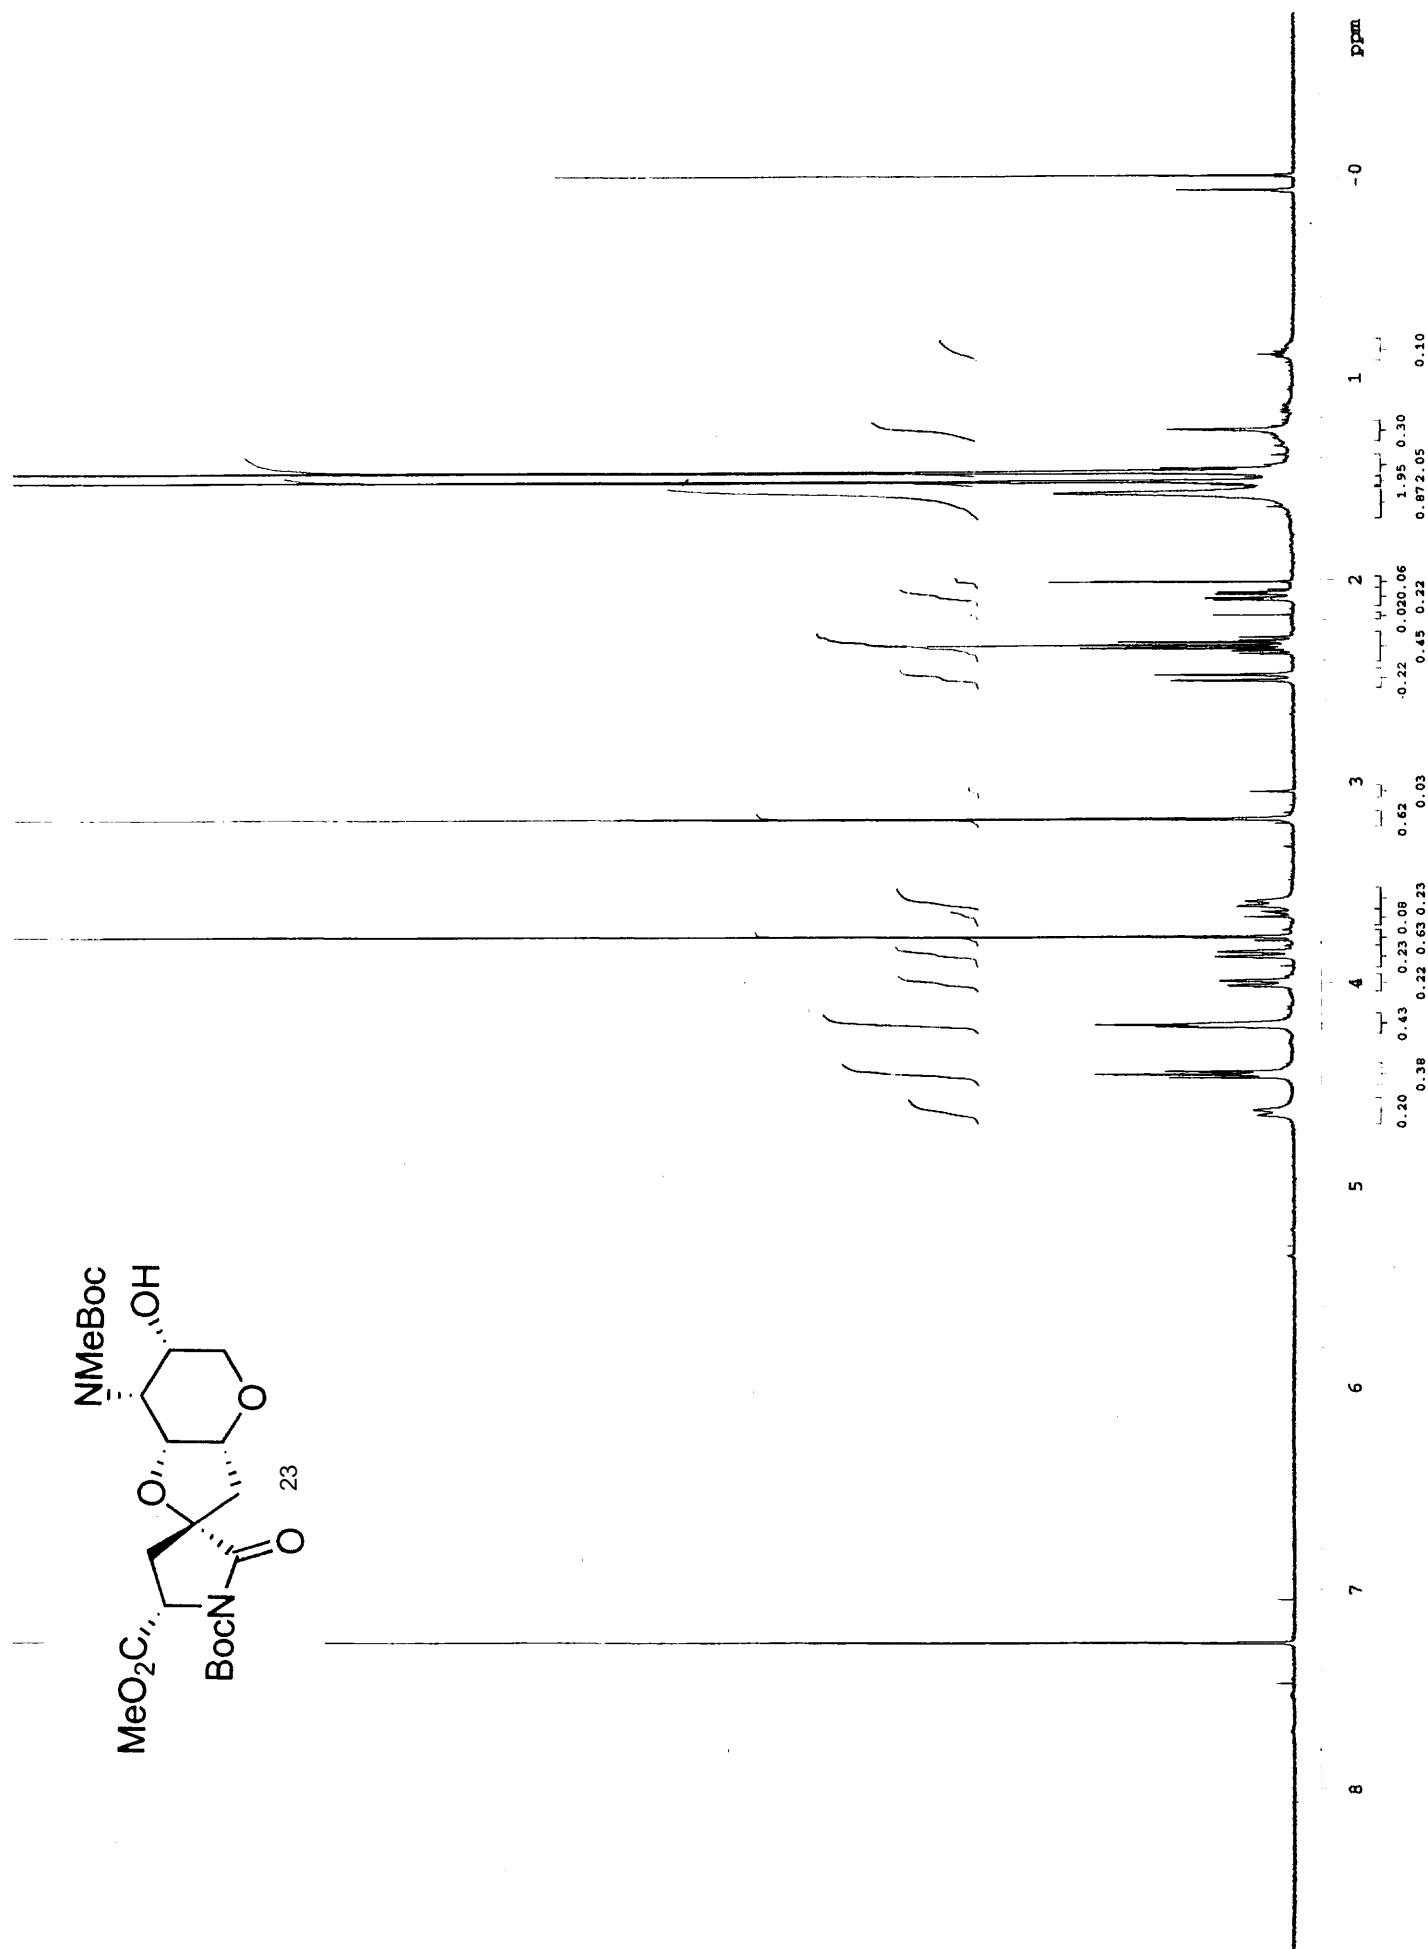

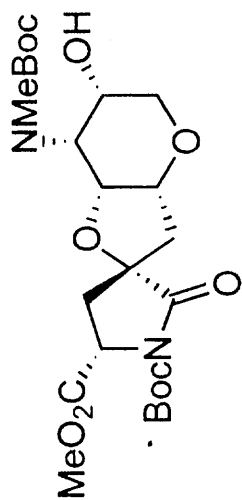

NOESY (500 MHz, CDCl<sub>3</sub>)

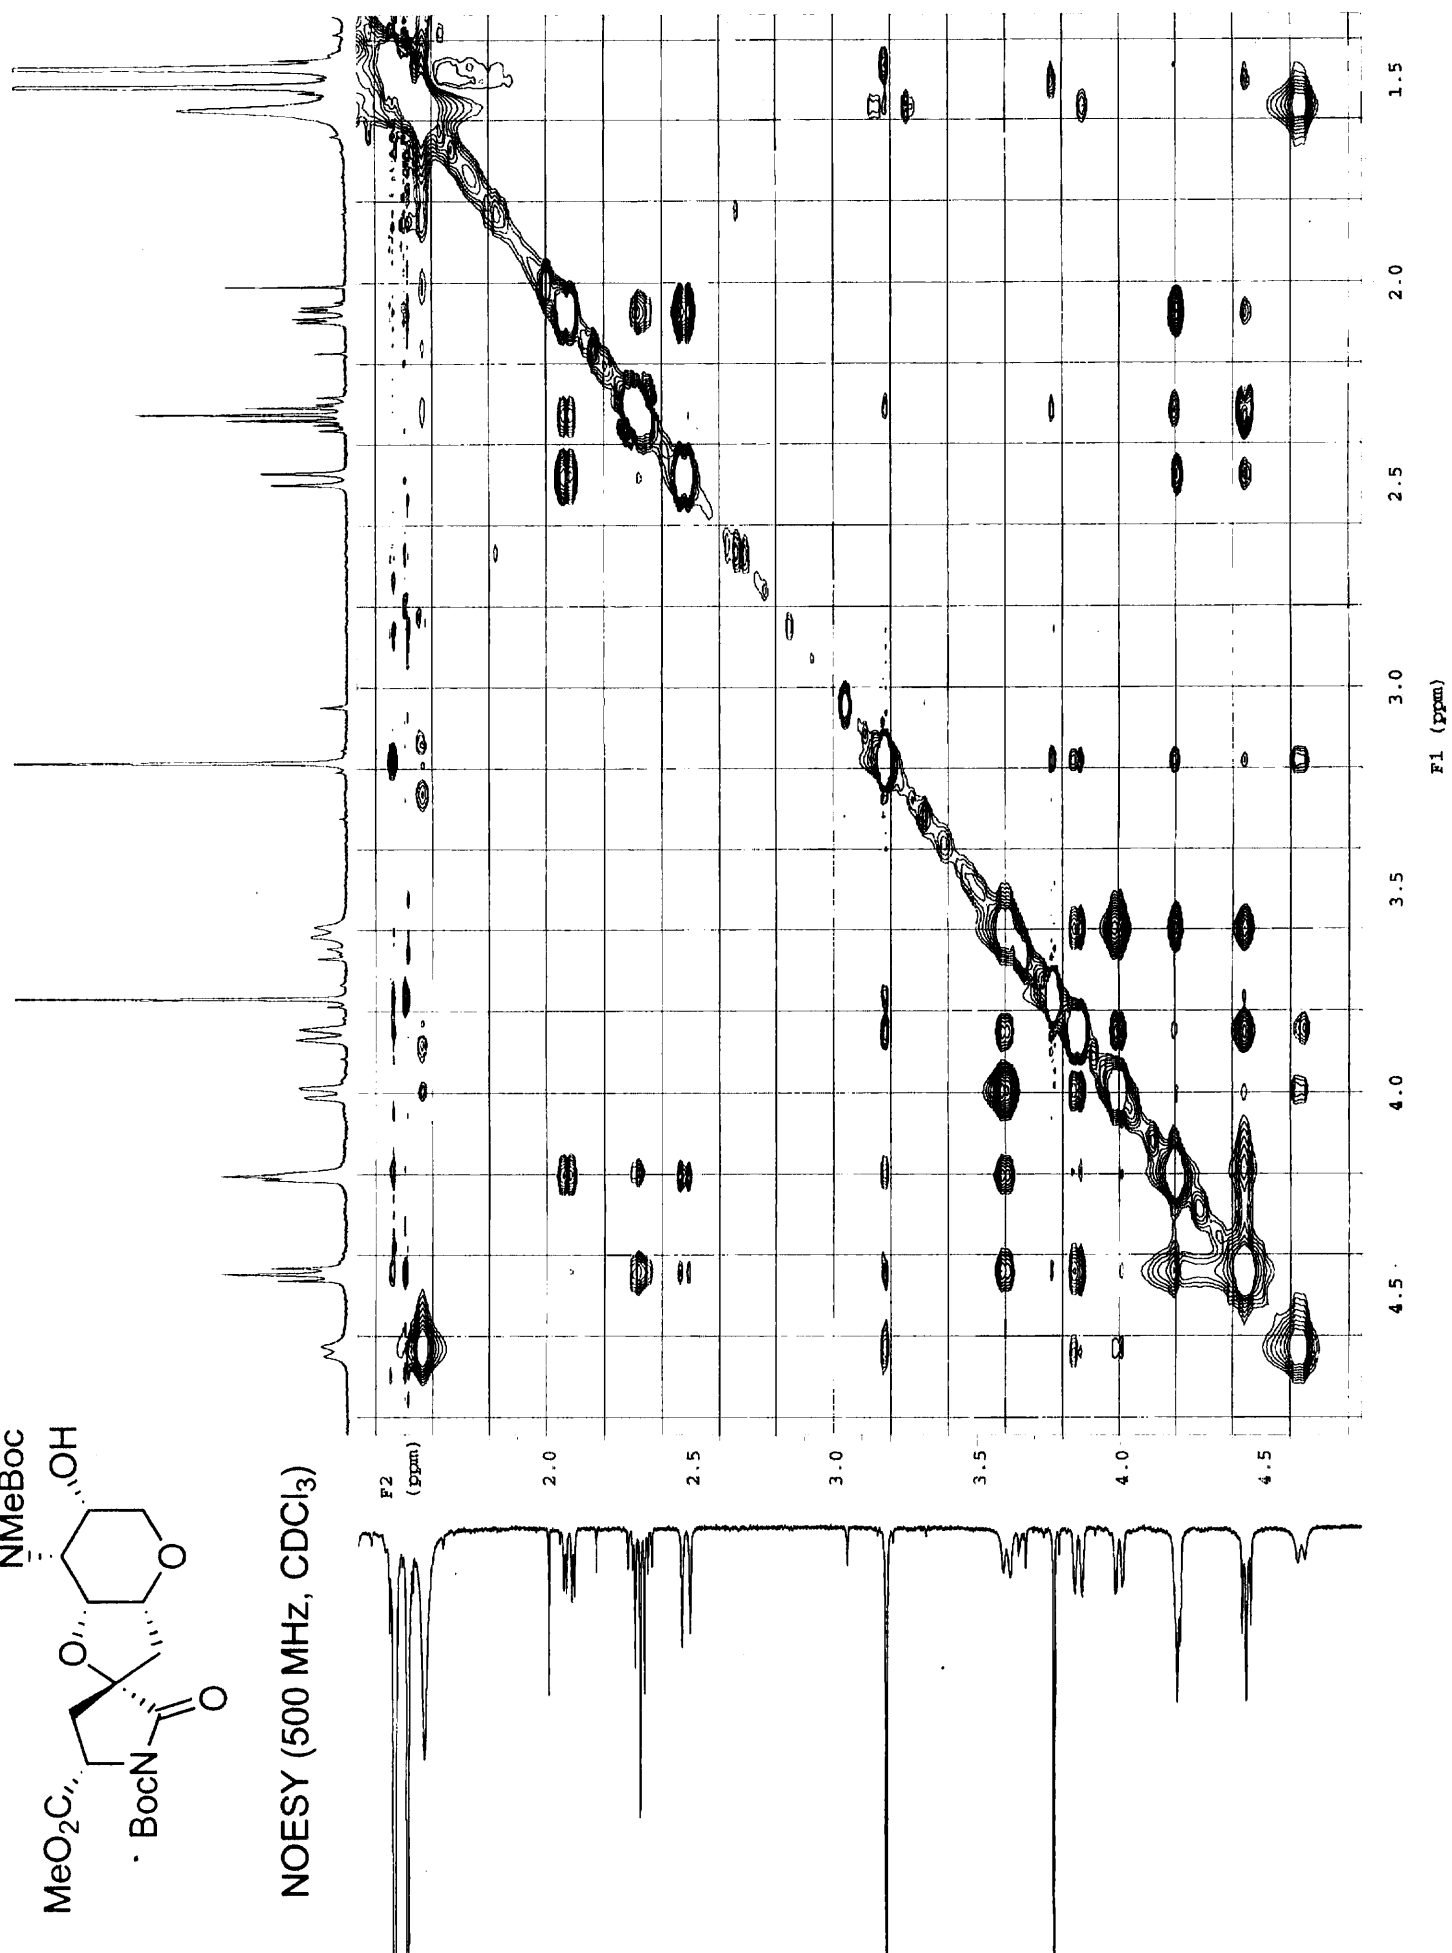

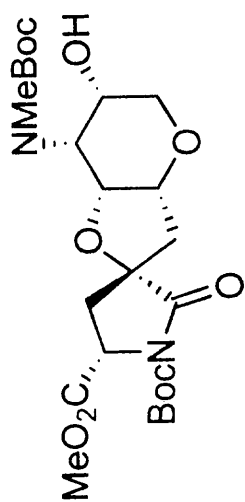

COSY (500 MHz, CDCl<sub>3</sub>)

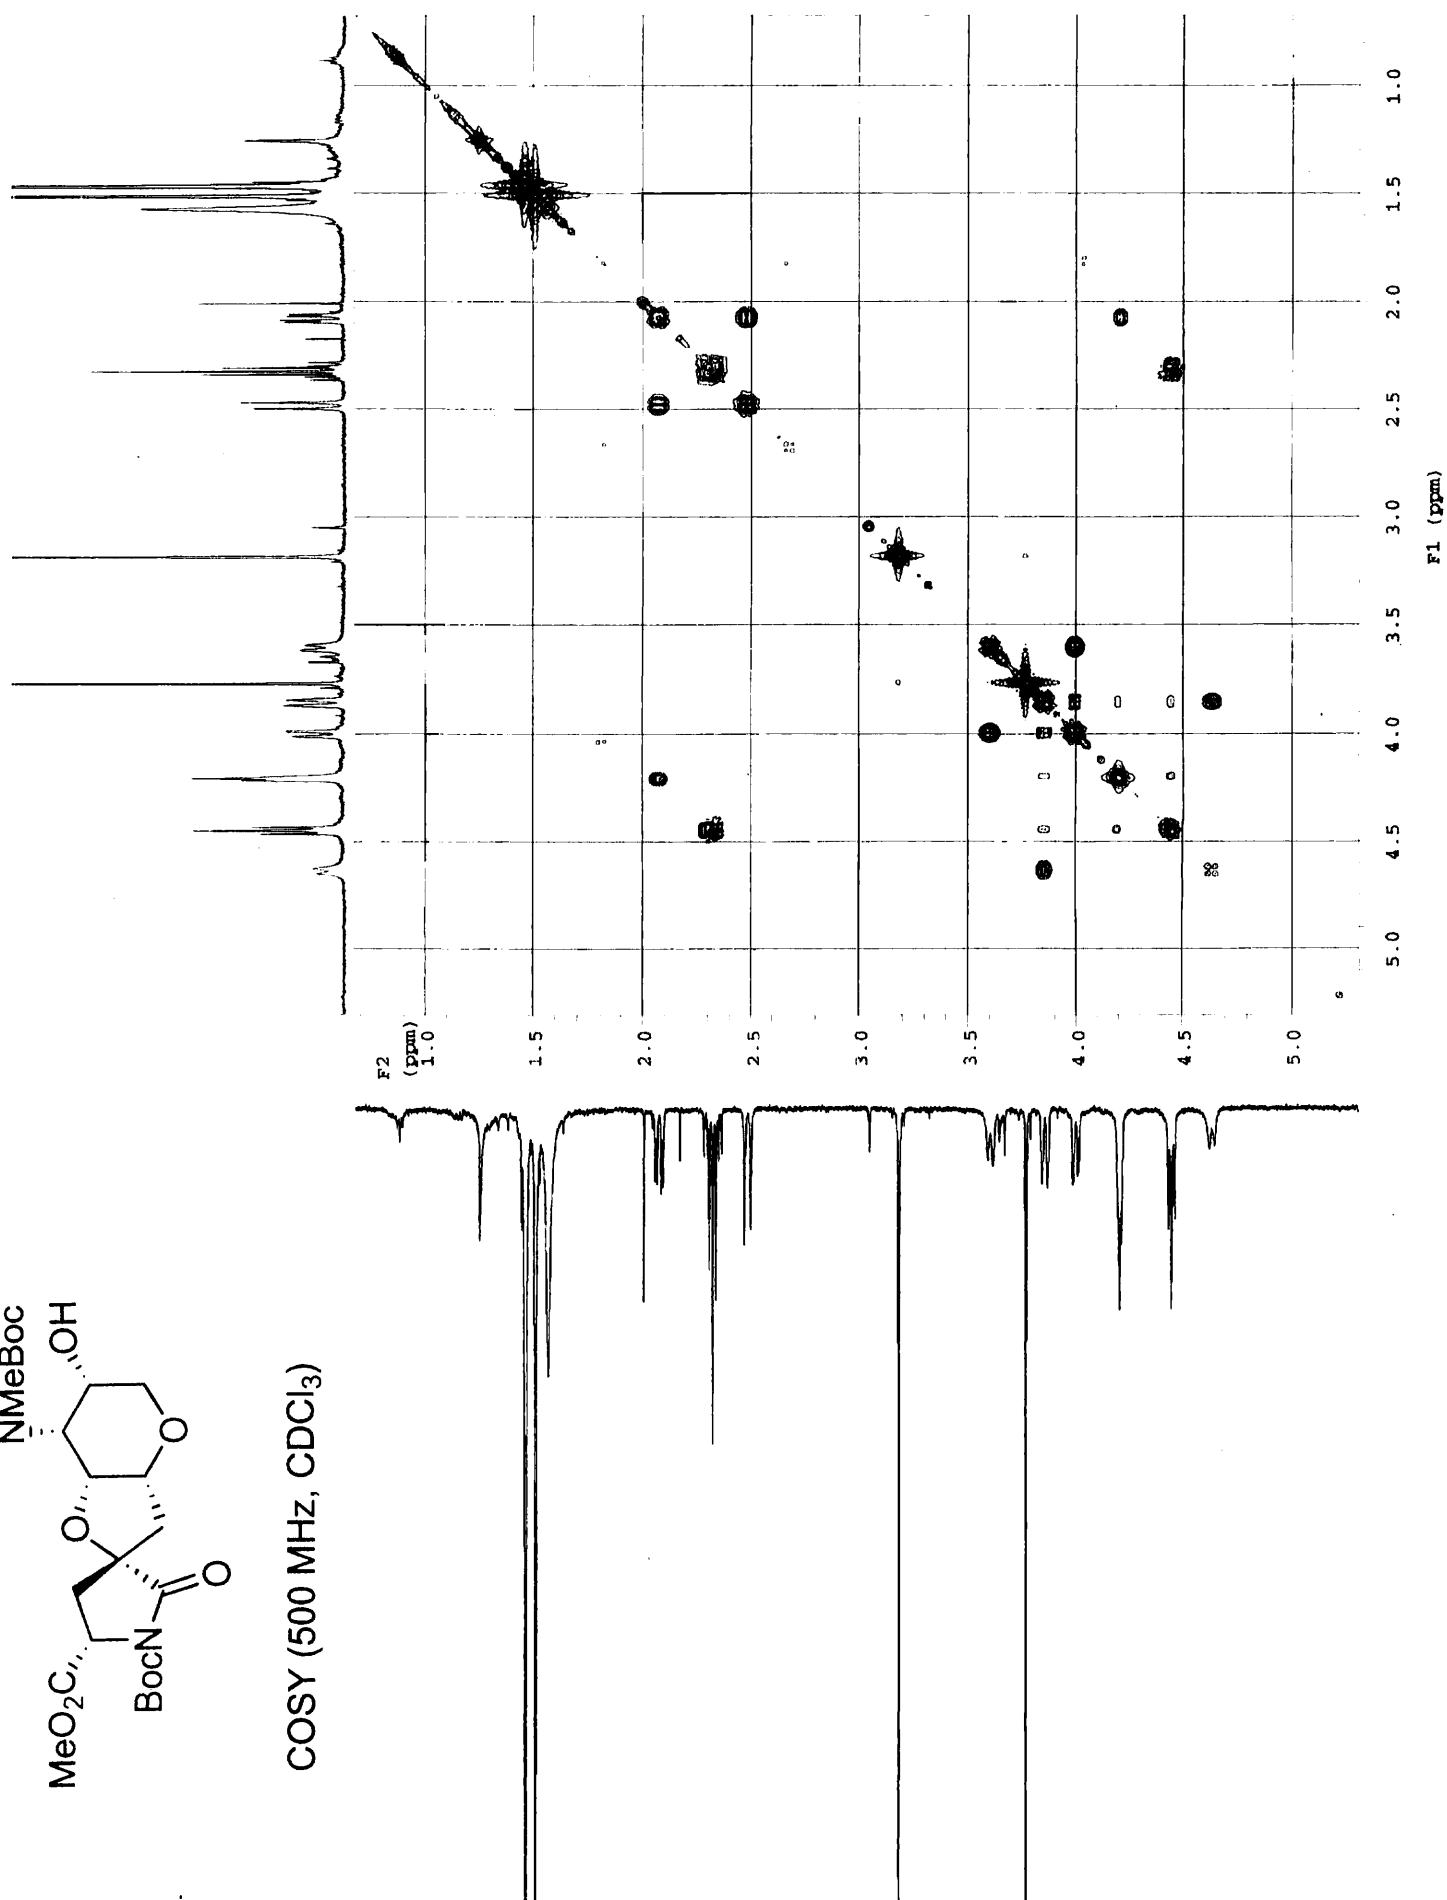

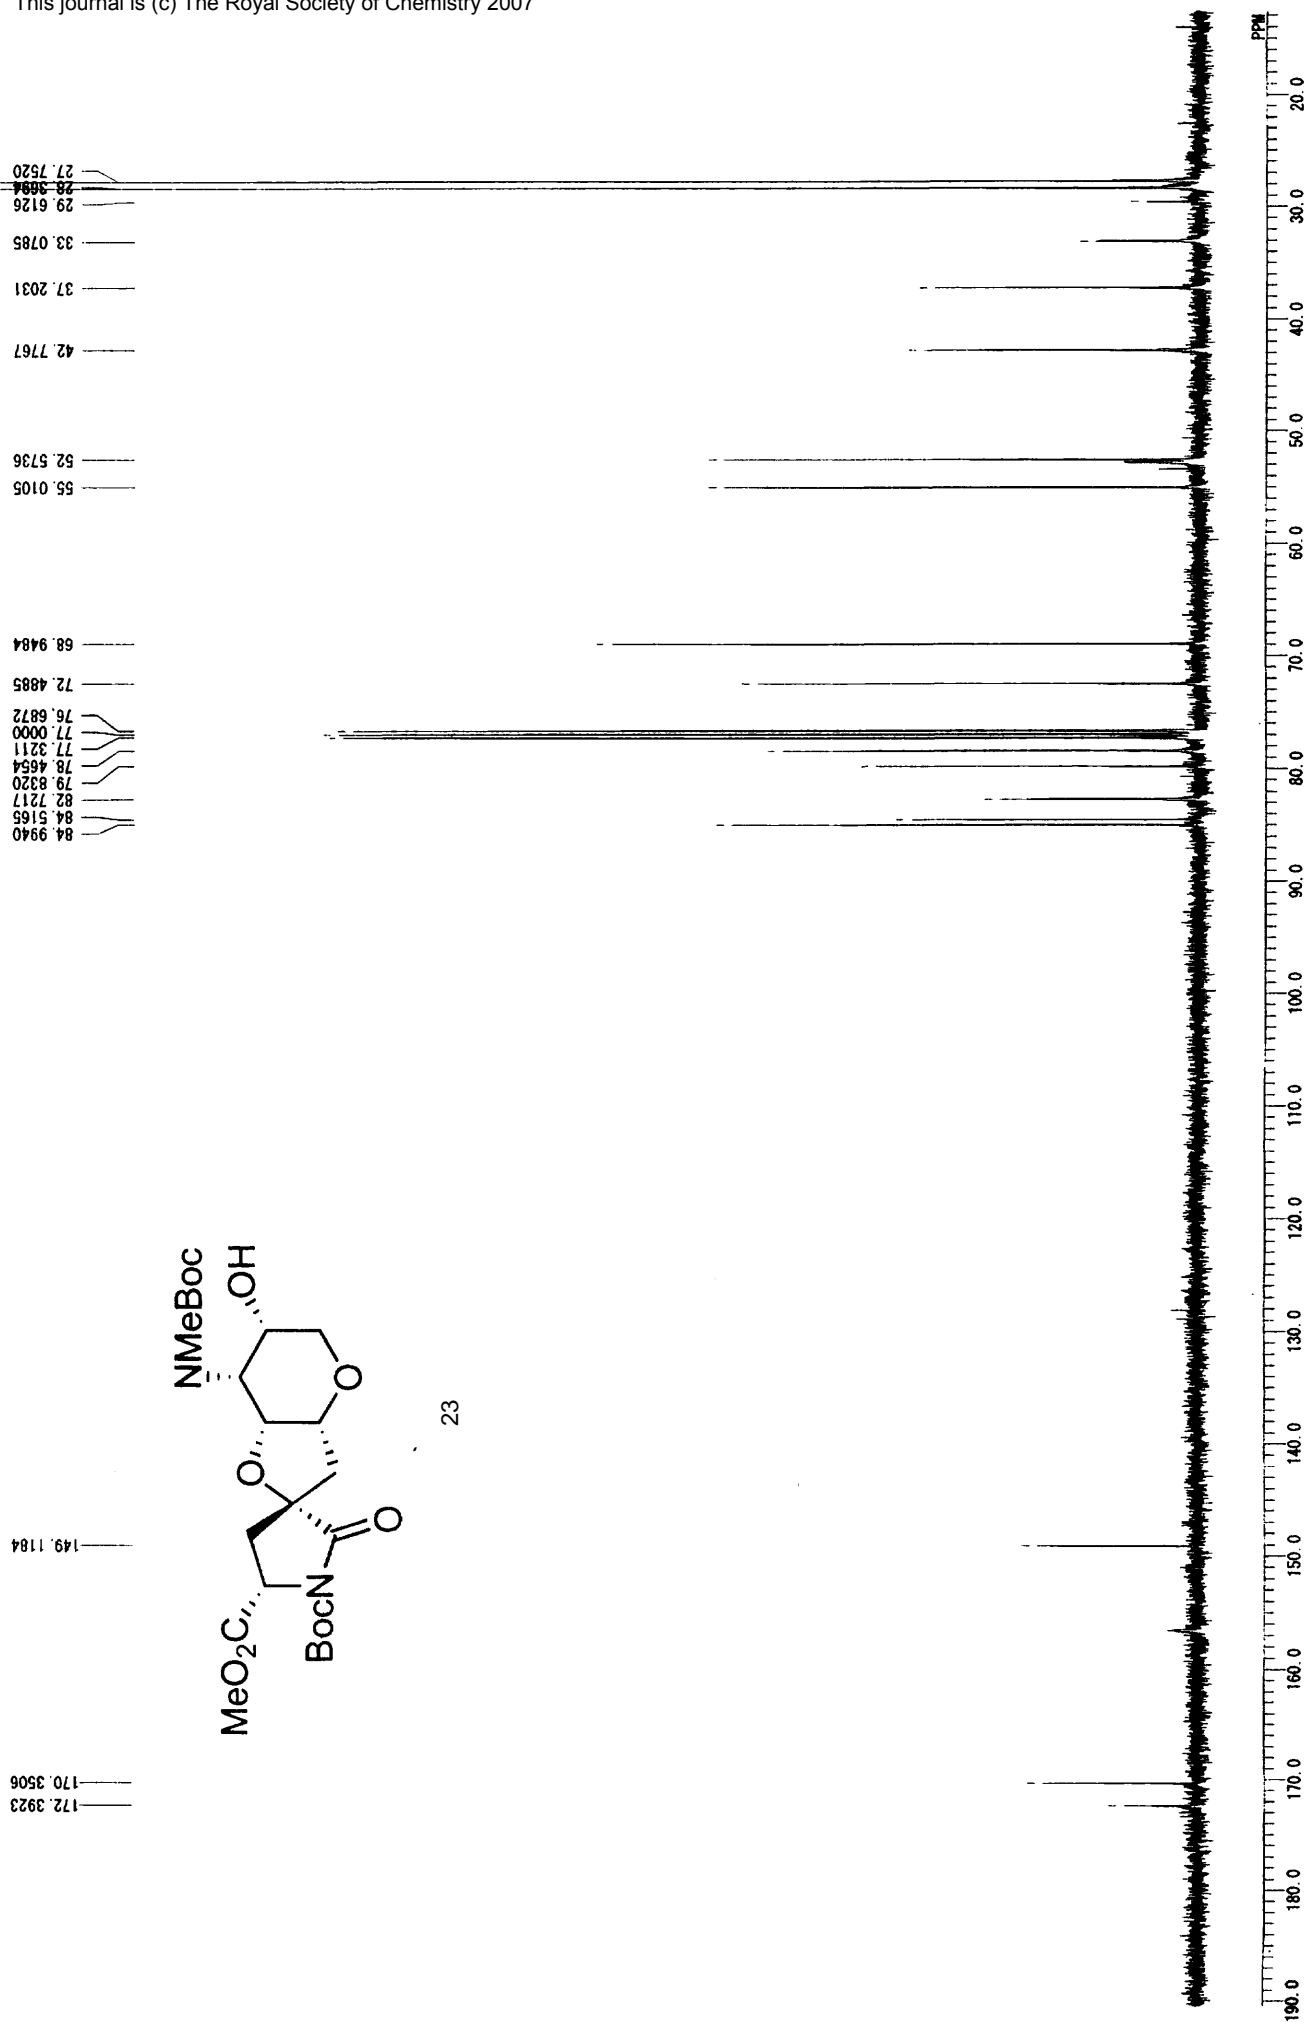



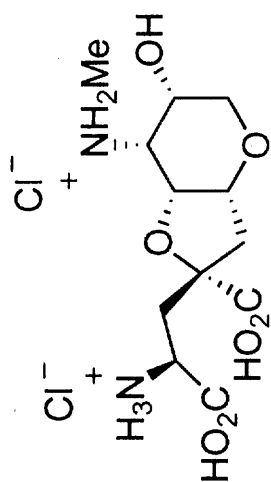

Dysiherbaine hydrochloride (Natural)

$^1\text{H}$  NMR 500 MHz,  $\text{D}_2\text{O}$

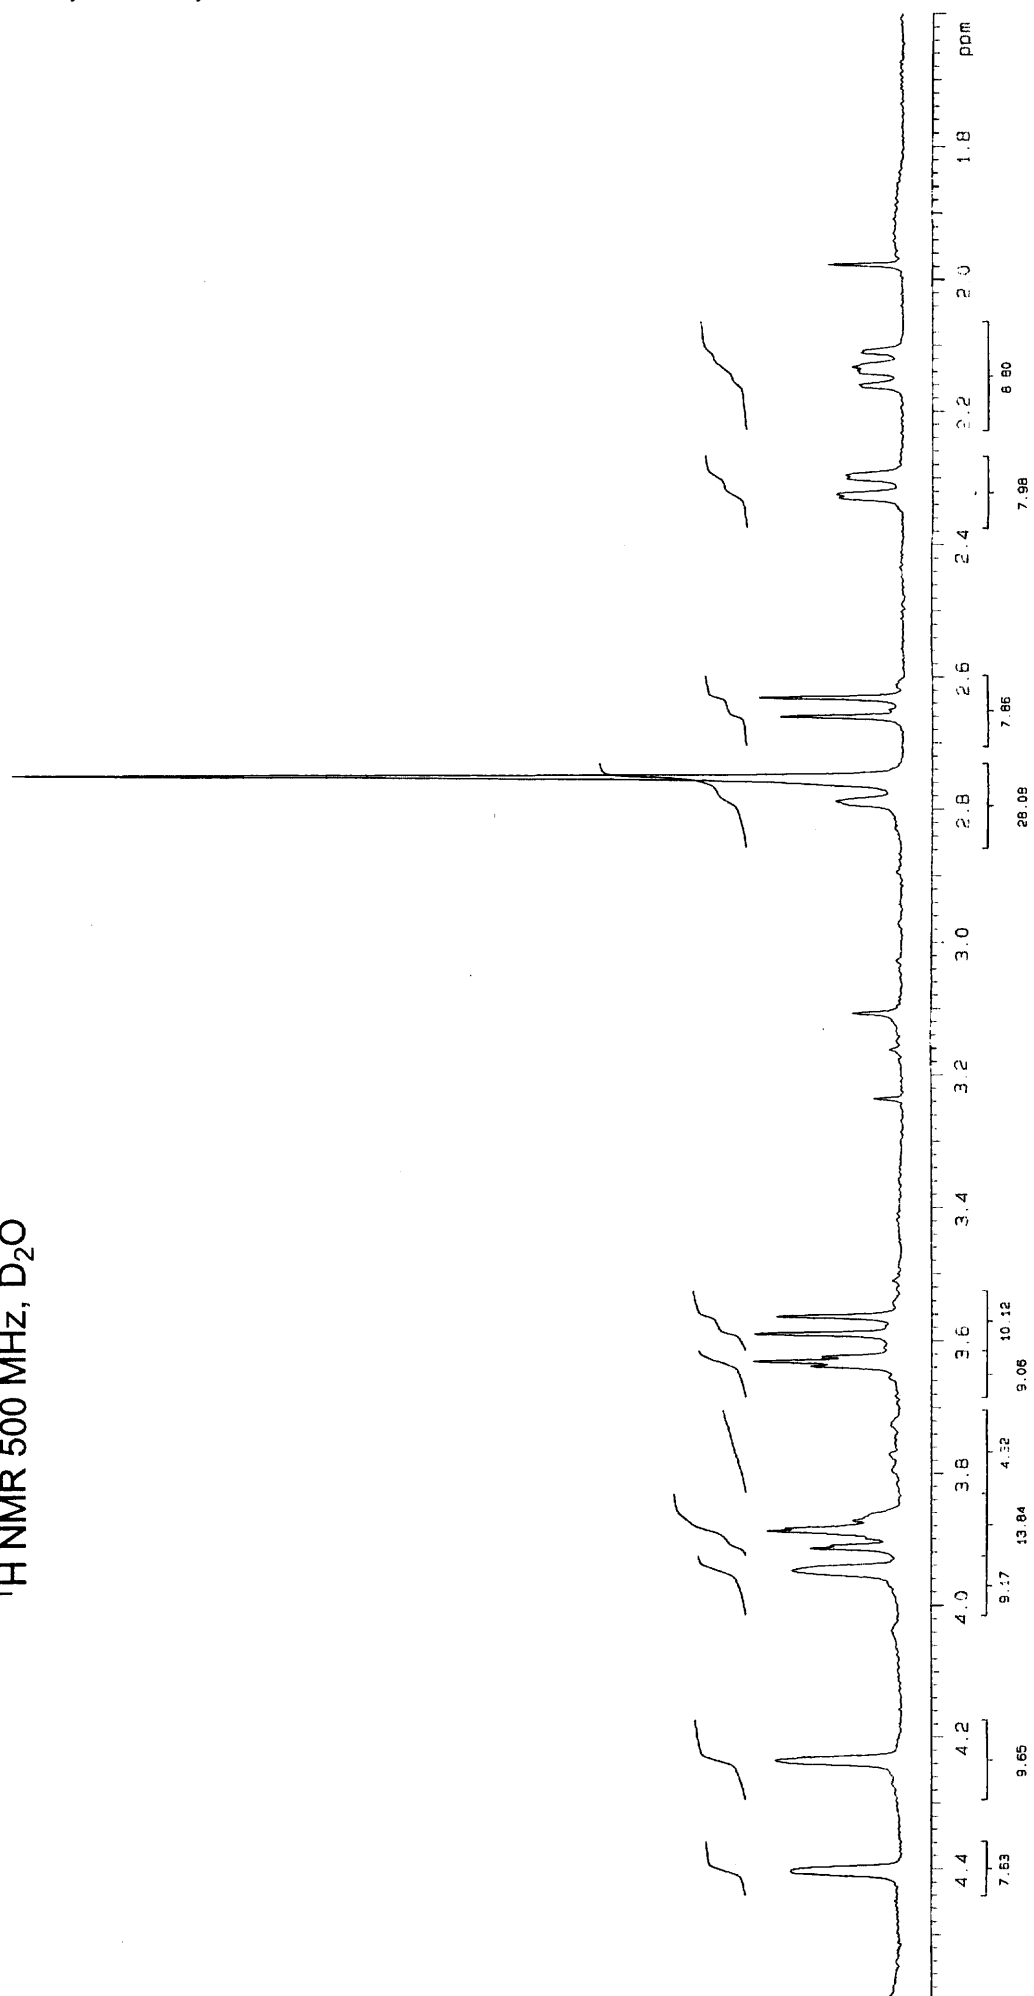

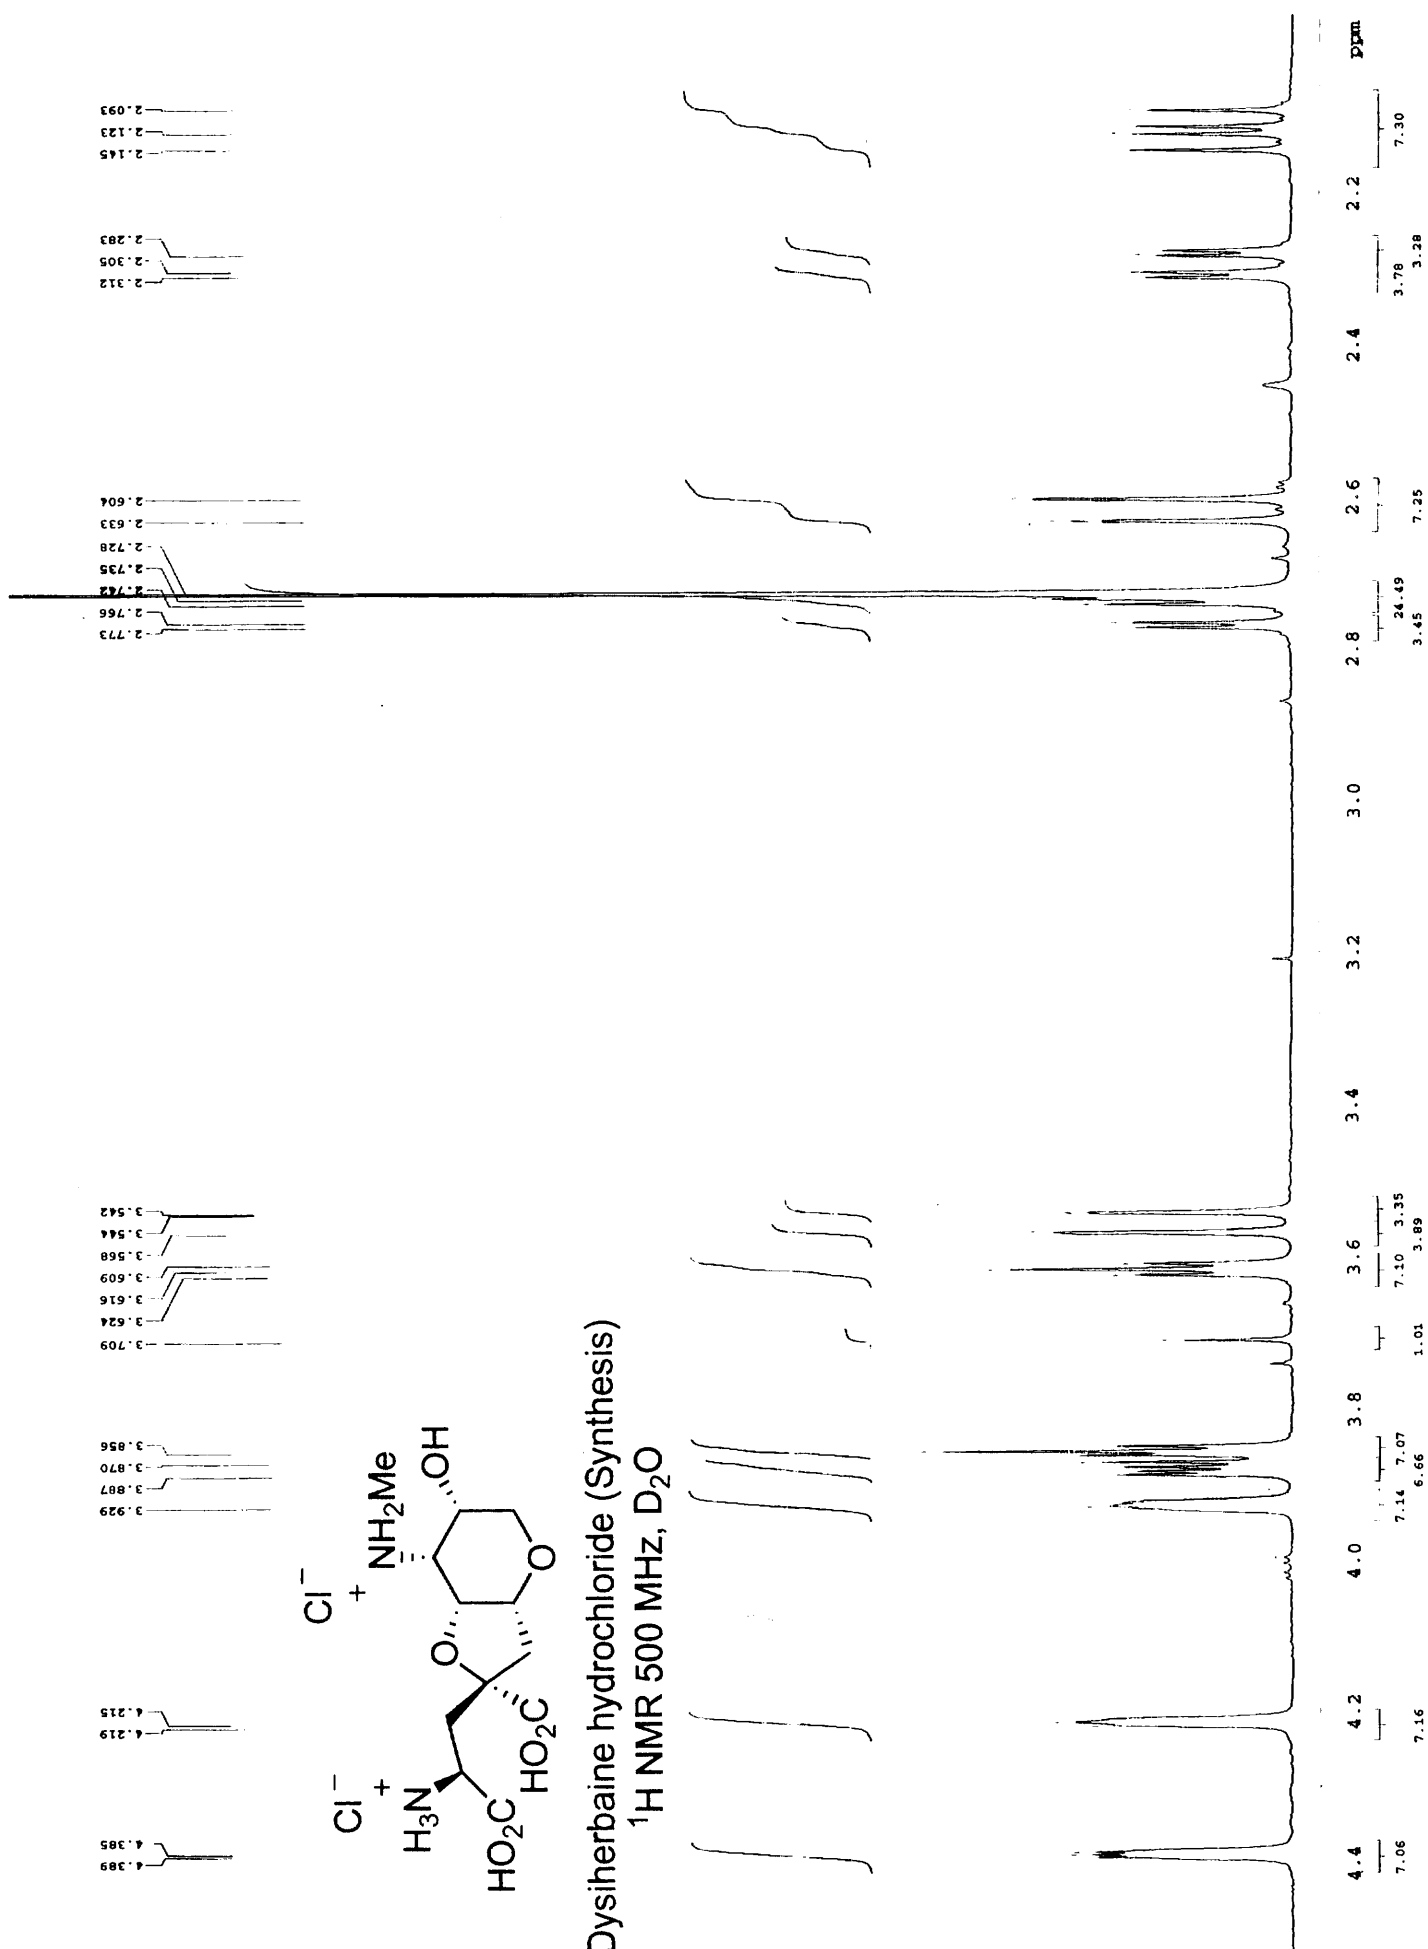

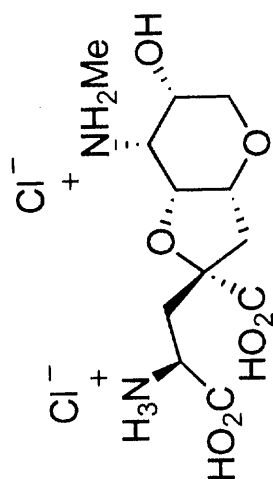

Dysiherbaine hydrochloride (Synthesis)  
<sup>13</sup>C NMR 100 MHz, D<sub>2</sub>O

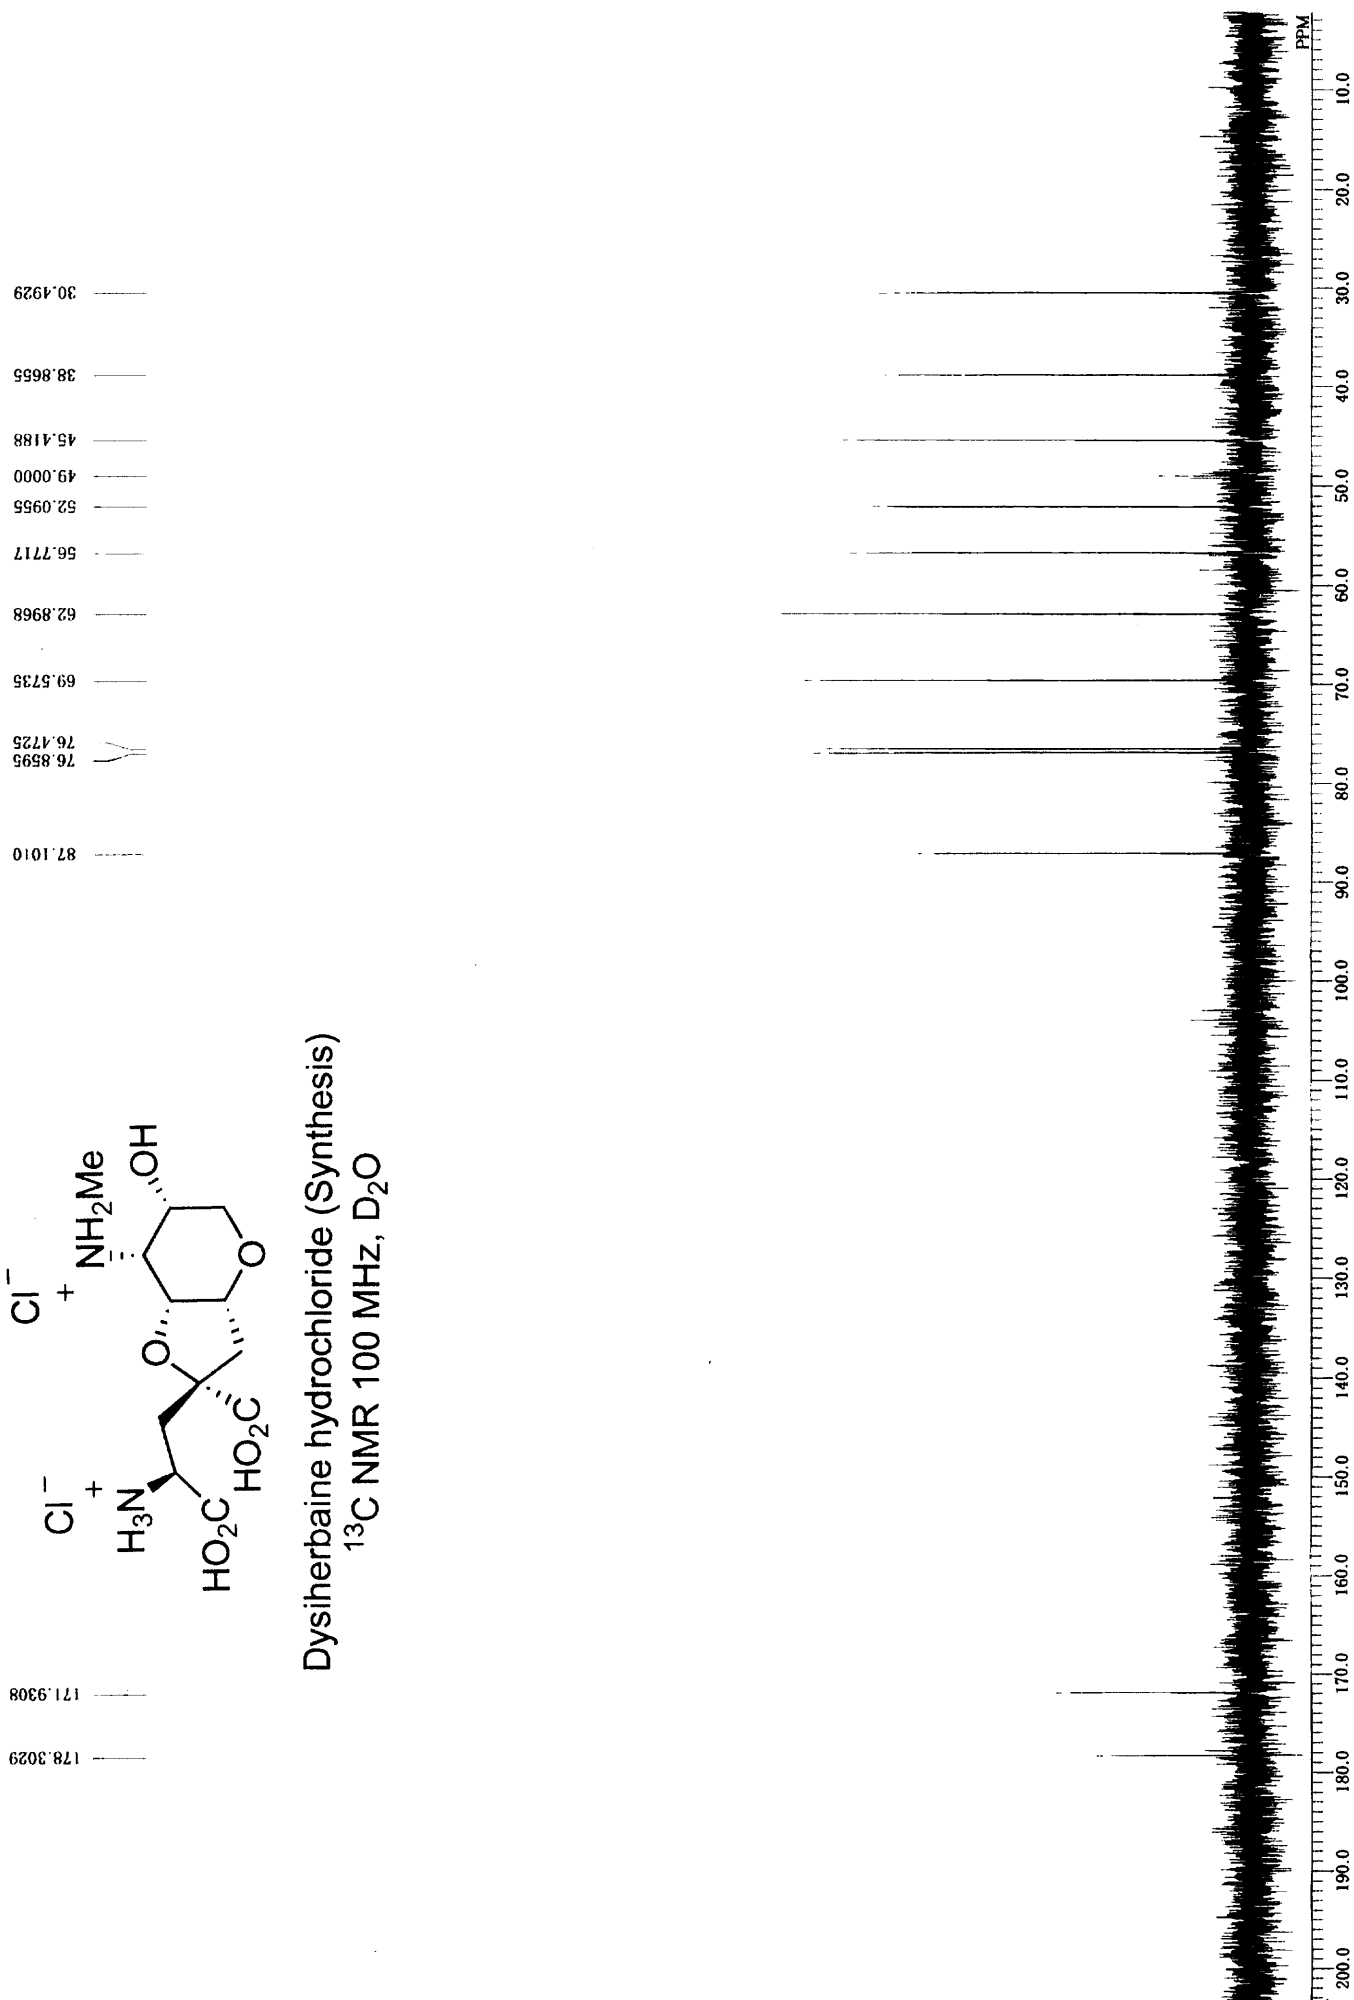

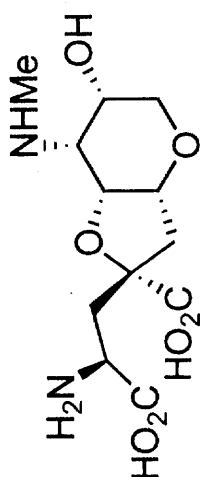

Dysiherbaine (Natural)

<sup>1</sup>H NMR 500 MHz, D<sub>2</sub>O

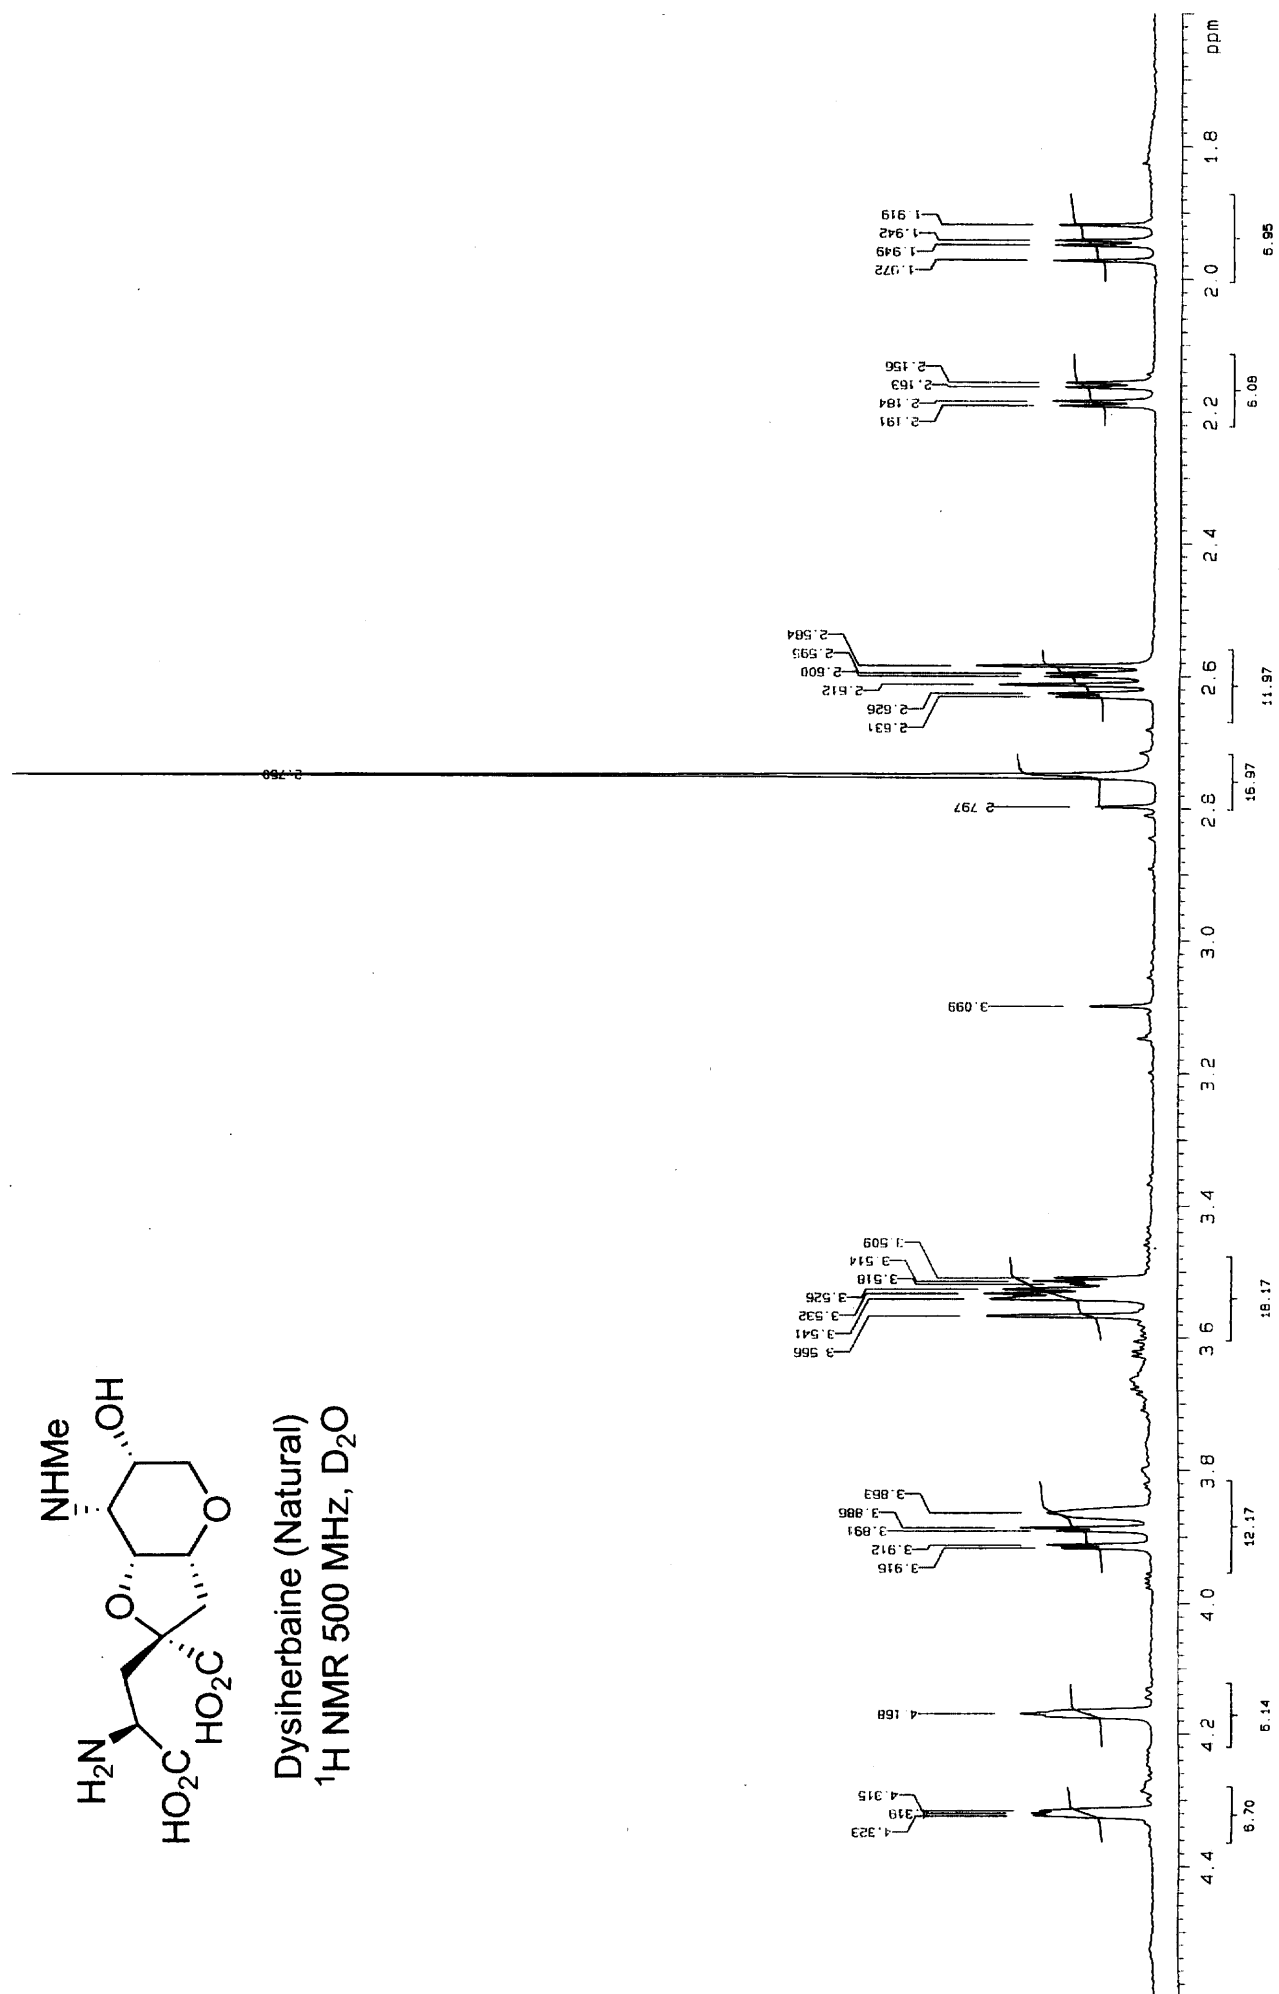

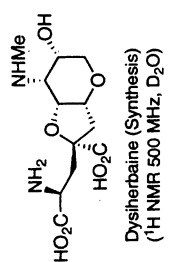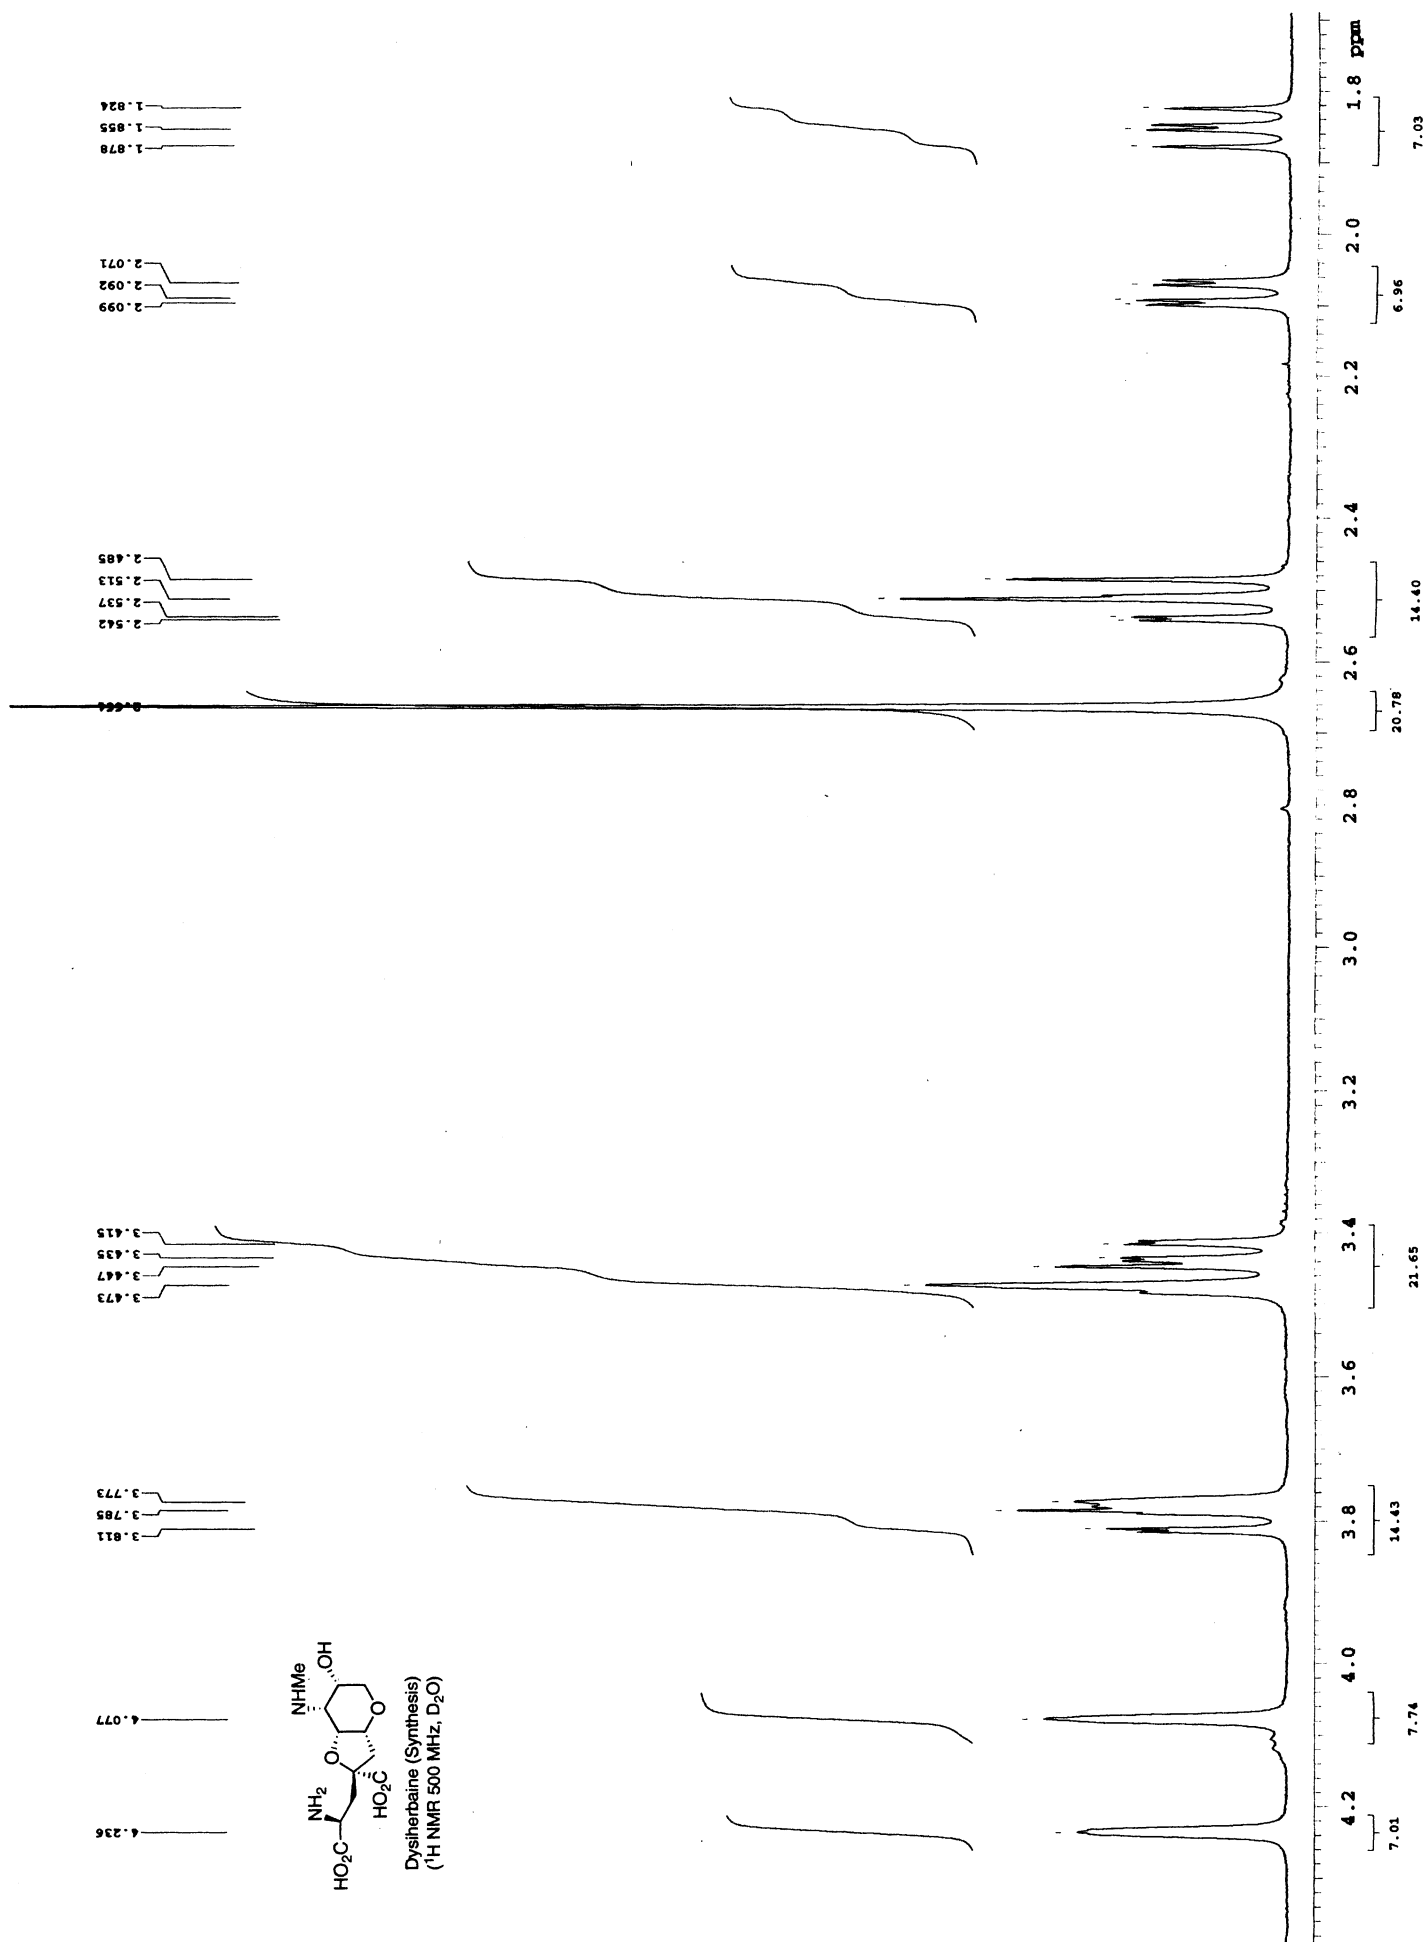

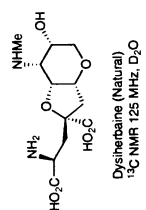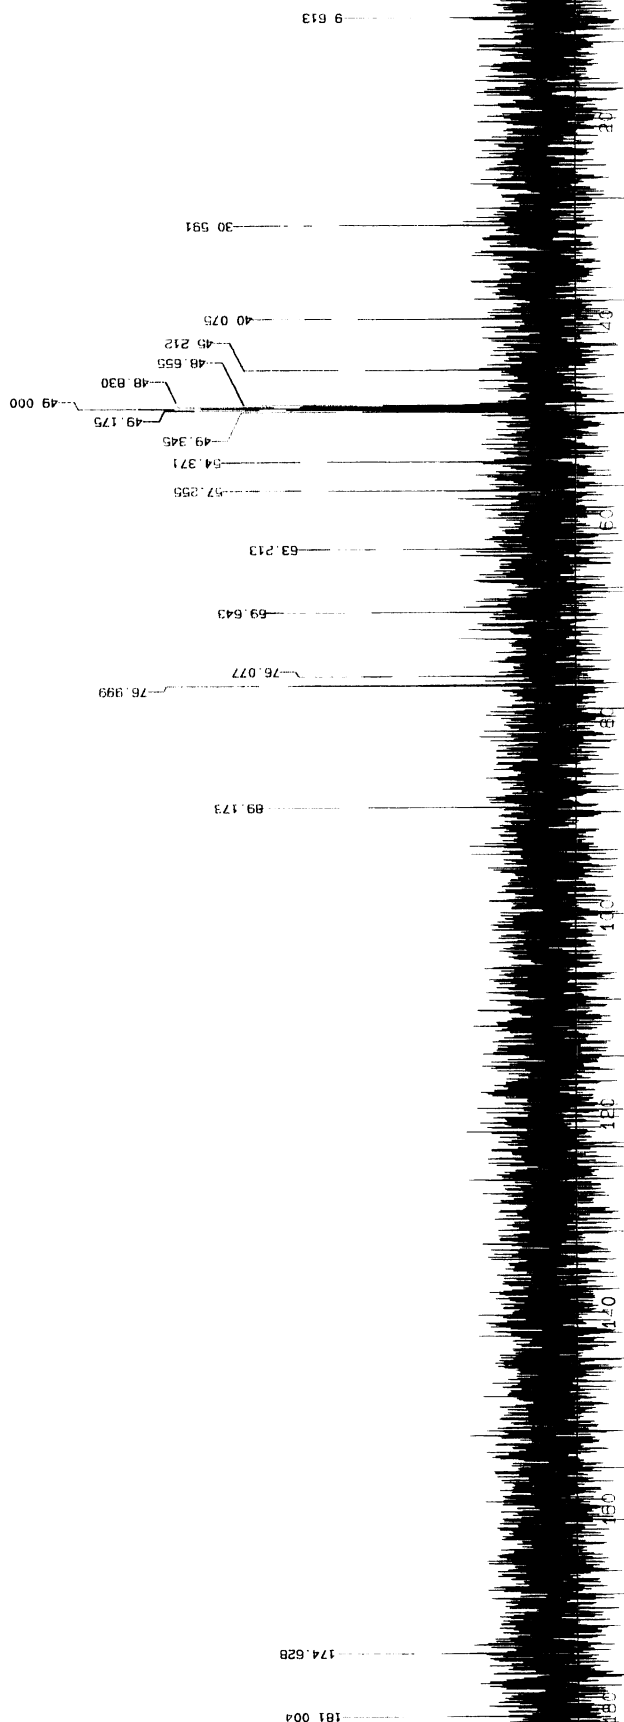

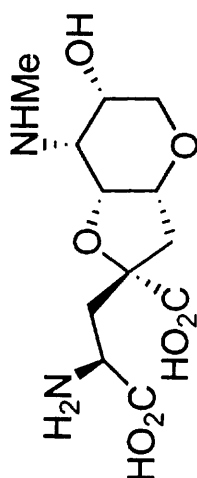

Dysiherbaine (Synthesis)  
 $^{13}\text{C}$  NMR 100 MHz,  $\text{D}_2\text{O}$

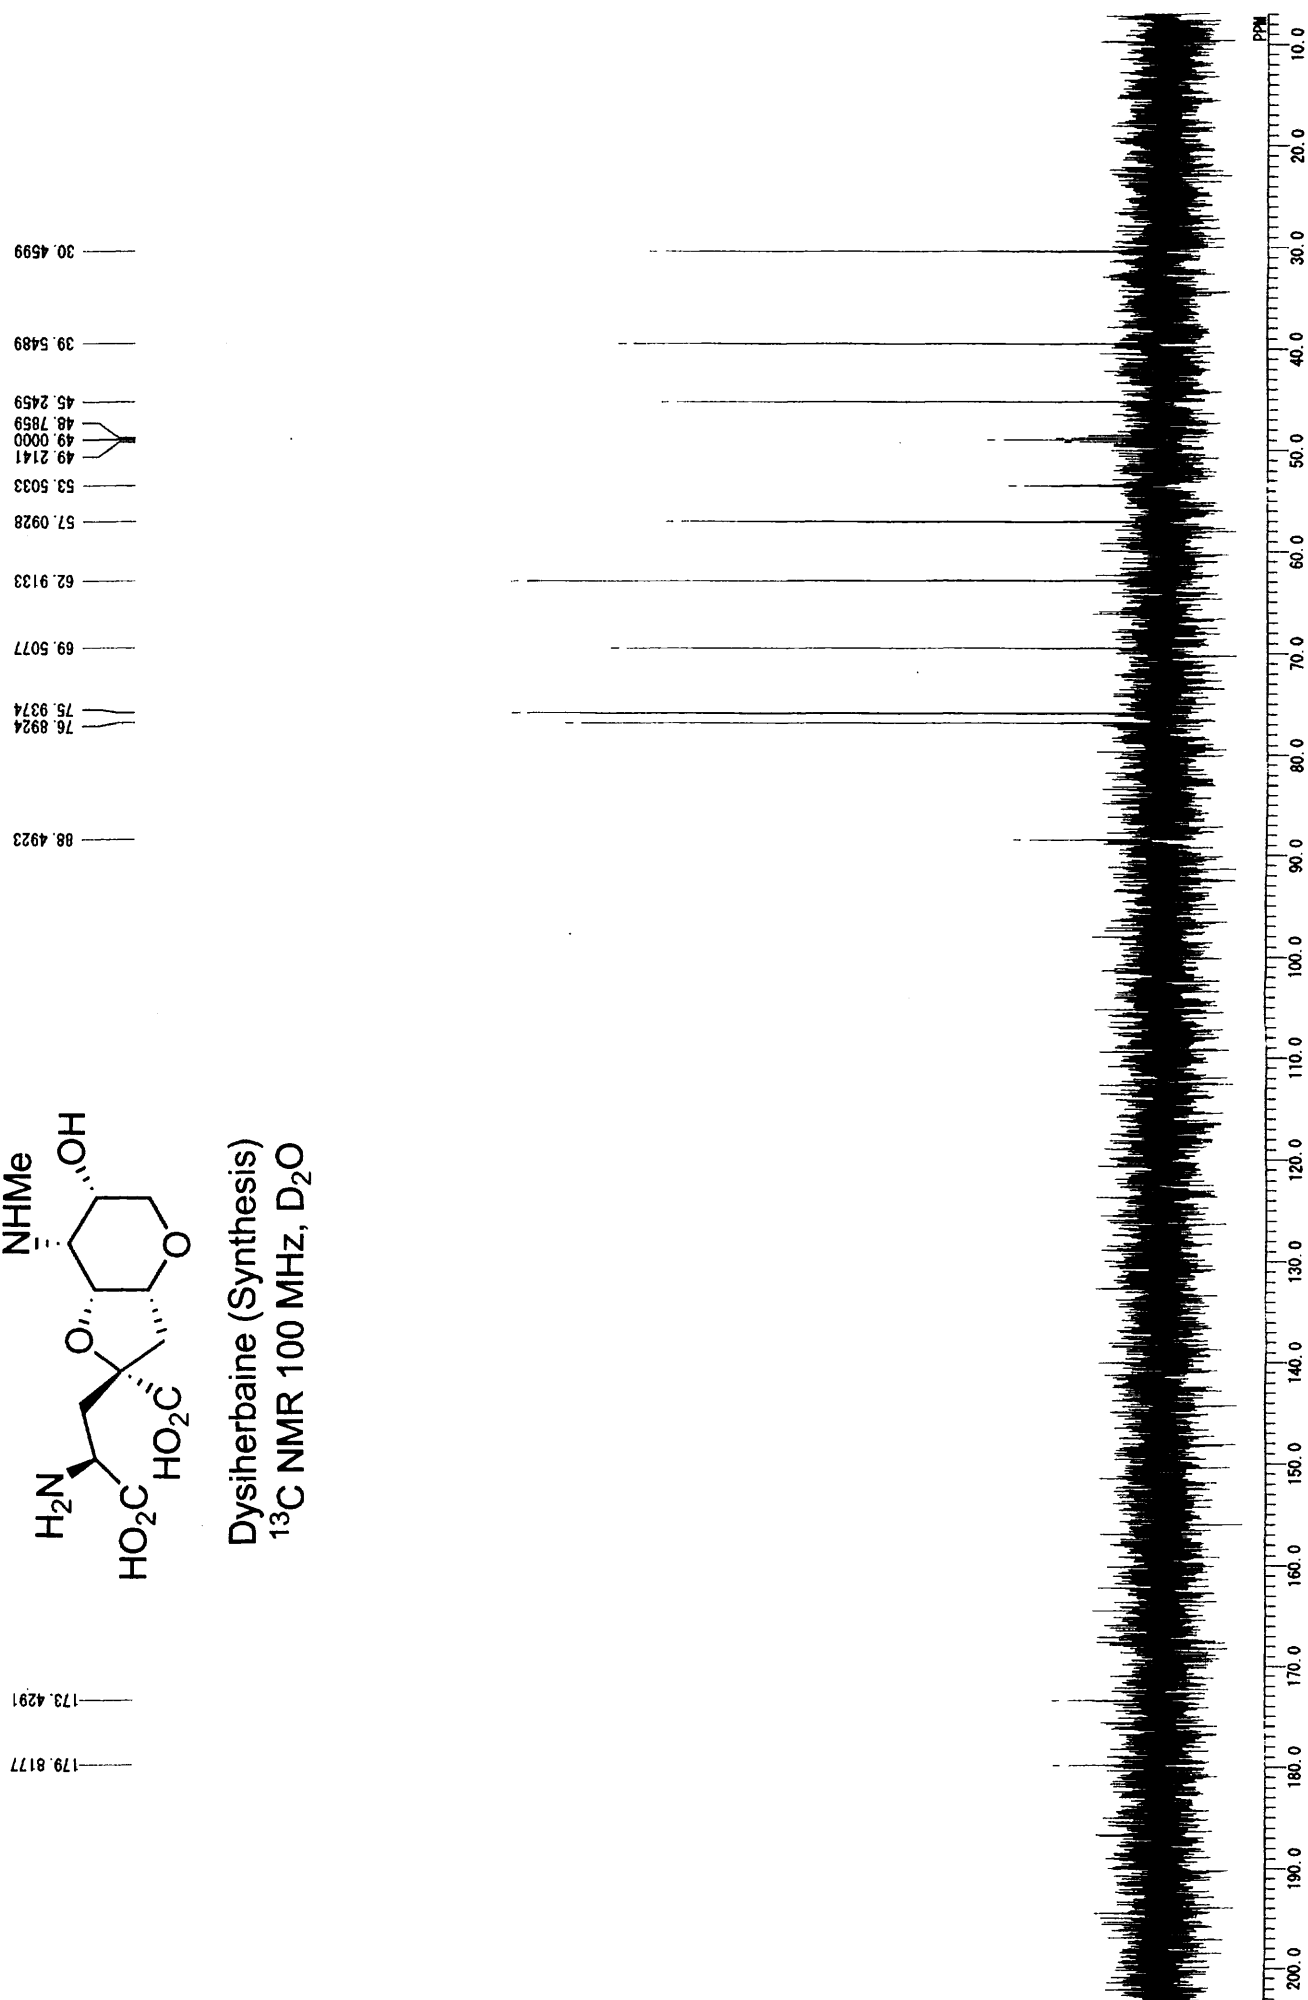

Supplement: b709627e.pdf [file b709627e.pdf]
